# Supplementary material
Source: publisher figshare collection journal article supplement (https://acs.figshare.com/ndownloader/files/24349419)
Supplement: Supplementary file 1 [file 24349419]

# Supporting Information

## **Rational Design of Triplet Sensitizers for the Transfer of Excited State Photochemistry from UV to Visible**

Luke D. Elliott,<sup>\*,[a]</sup> Surajit Kayal,<sup>[b]</sup> Michael W. George<sup>[b,c]</sup>  
and Kevin Booker-Milburn<sup>\*,[a]</sup>

[a] School of Chemistry, University of Bristol, Cantock's Close, Bristol, BS8 1TS, UK

[b] School of Chemistry, University of Nottingham, University Park, NG7 2RD, UK

[c] Department of Chemical and Environmental Engineering, The University of Nottingham Ningbo China, 199 Taikang East Road, Ningbo 315100, China

## Table of Contents

|                                                                                            |    |
|--------------------------------------------------------------------------------------------|----|
| General Details.....                                                                       | 4  |
| General Batch Irradiation Procedure.....                                                   | 4  |
| Synthesis of Thioxanthone Derivatives .....                                                | 4  |
| Newman-Kwart Rearrangements.....                                                           | 4  |
| 4-methoxythiosalicylic acid .....                                                          | 5  |
| 4-fluorothiosalicylic acid .....                                                           | 5  |
| 5-methoxythiosalicylic acid .....                                                          | 6  |
| 5-fluorothiosalicylic acid .....                                                           | 6  |
| Ullmann-Coupling / Friedel-Crafts Cyclization to Thioxanthenes.....                        | 7  |
| 4-methoxythioxanthone (4-MeOTX) .....                                                      | 7  |
| 3-methoxythioxanthone (3-MeOTX).....                                                       | 8  |
| 2-methoxythioxanthone (2-MeOTX).....                                                       | 8  |
| 3-fluorothioxanthone (3-FTX) .....                                                         | 9  |
| 2-fluorothioxanthone (2-FTX) .....                                                         | 9  |
| 3,6-dimethoxythioxanthone (3,3'-MeOTX).....                                                | 10 |
| 3,6-difluorothioxanthone (3,3'-FTX).....                                                   | 10 |
| 2-methoxy,7-fluorothioxanthone (2-F,2'-MeOTX) .....                                        | 11 |
| 2,7-dimethoxythioxanthone (2,2'-MeOTX).....                                                | 11 |
| UV-Vis Spectra of Thioxanthone Derivatives .....                                           | 12 |
| Triplet Measurements of Thioxanthone Derivatives.....                                      | 14 |
| Low temperature (77 K) emission measurement: .....                                         | 14 |
| ps and ns TRIR Studies.....                                                                | 16 |
| Instrumentation .....                                                                      | 16 |
| ps (400 nm excitation) TRIR spectra and kinetics of ITX .....                              | 17 |
| Estimation of triplet quantum yield for ITX from the parent bleach recovery kinetics ..... | 18 |
| TD-DFT Calculations of Thioxanthone Derivatives.....                                       | 20 |
| Optimised co-ordinates .....                                                               | 20 |
| 3,3'-MeOTX .....                                                                           | 20 |
| 3,3'-FTX .....                                                                             | 21 |
| 3-MeOTX.....                                                                               | 22 |
| 3-FTX.....                                                                                 | 23 |
| TX .....                                                                                   | 24 |
| ITX.....                                                                                   | 25 |
| 2-FTX.....                                                                                 | 26 |
| 4-MeOTX.....                                                                               | 27 |
| 2-MeOTX.....                                                                               | 28 |

|                                                                   |    |
|-------------------------------------------------------------------|----|
| 2-F,2'-MeOTX.....                                                 | 29 |
| 2,2'-MeOTX .....                                                  | 30 |
| Excited State Energies .....                                      | 31 |
| Synthesis of Novel Photochemical Precursors.....                  | 33 |
| Amino cinnamate 8 .....                                           | 33 |
| Boc protection to 25 .....                                        | 34 |
| $\alpha$ -amido acrylate 13.....                                  | 34 |
| Amido styrene 23 .....                                            | 35 |
| <i>N</i> -Bn-3-(but-3-en-1-yloxy)-maleimide (27).....             | 36 |
| Novel Reactor Configurations .....                                | 36 |
| Parallel NMR Tube Irradiations.....                               | 36 |
| 36 W Blue COB Reactor Configuration .....                         | 37 |
| 36 W Blue COB Reactor Construction .....                          | 37 |
| TX Sensitizer Screening Studies.....                              | 38 |
| Alkene Isomerization Studies in NMR Tubes .....                   | 38 |
| Sensitizer Screen with 125 W, 150 ml Immersion Well Reactor ..... | 40 |
| Enamide (1) to 2,4-methanopyrrolidine (2) .....                   | 40 |
| THPA (3) to Cyclobutene (7).....                                  | 40 |
| Cross [2+2] / retro-Mannich of (8) to (10).....                   | 41 |
| Cross [2+2] Sensitizer Screen in NMR Tubes.....                   | 42 |
| $\alpha$ -amido acrylate (11) to 2,4-methanoproline (12).....     | 42 |
| $\alpha$ -amido acrylate (13) to 2,4-methanoproline (14).....     | 42 |
| Preparative Scale Synthesis of 2,4-methanoproline (14) .....      | 43 |
| Blue Light Mediated Reactions with 36 W, 455 nm COB Reactor ..... | 44 |
| General procedure.....                                            | 44 |
| Intramolecular [2+2] of Styrene 15.....                           | 44 |
| Intramolecular [2+2] of Styrene 17.....                           | 44 |
| Cross [2+2] of Enamide 1 .....                                    | 45 |
| Cross [2+2] of Enamide 19 .....                                   | 45 |
| Cross [2+2] of Enamide 21 .....                                   | 45 |
| Cross [2+2] of Enamide 23 .....                                   | 46 |
| Cross [2+2] of Amino Cinnamate 25 .....                           | 46 |
| Intramolecular [2+2] of Alkoxy-maleimide 27.....                  | 47 |
| Cookson's Dione [2+2].....                                        | 47 |
| X-Ray Data for 24 and 26.....                                     | 49 |
| Copies of $^1\text{H}$ and $^{13}\text{C}$ NMR Spectra.....       | 52 |

## General Details

All reagents and solvents were used as purchased and no special precautions were taken to dry or otherwise further purify. For the purposes of thin layer chromatography (tlc), Merck silica-aluminium plates were used, visualising with UV light (254 nm) and/or dipping in potassium permanganate followed by heating. For column chromatography, Sigma Aldrich technical grade 60Å silica gel was used. All NMR data was collected using either a Jeol Eclipse 400 MHz, Varian 400 MHz or Varian 500 MHz instruments. Data was processed directly using MestReNova (version 11.0.2). Chemical shifts ( $\delta$ ) are given in parts per million (ppm). Reference values for residual solvents were taken as  $\delta$  = 7.27 (CDCl<sub>3</sub>), 2.50 (DMSO-d<sub>6</sub>) and 2.05 (acetone-d<sub>6</sub>) for <sup>1</sup>H NMR and  $\delta$  = 77.16 ppm (CDCl<sub>3</sub>), 39.52 (DMSO-d<sub>6</sub>) and 206.26 (acetone-d<sub>6</sub>) for <sup>13</sup>C NMR. Multiplicities for coupled signals were denoted as: s = singlet, d = doublet, t = triplet, q = quartet, m = multiplet, br. = broad, app. = apparent and dd = double doublet etc. Coupling constants (J) are given in Hz and are quoted to the nearest 0.1 Hz. Where appropriate, COSY, DEPT, HMQC and NOE NMR experiments were carried out to aid assignment. Mass spectrometry data was collected was carried out by the University of Bristol mass spectrometry service using Fisons Autospec or Bruker Daltonics MicrOTOF II instruments. Infrared data was collected using a Perkin-Elmer Spectrum One FTIR machine as thin films or solids compressed on a diamond plate. Melting points are uncorrected and were recorded on Stuart Scientific apparatus.

## General Batch Irradiation Procedure

For all photochemical reactions, solvents were “degassed” by evacuating a stirred vessel under vacuum and re-filling with N<sub>2</sub>. For the duration of the reaction, N<sub>2</sub> was bubbled through the solution. When photochemical reactions were followed for their duration by NMR, 1,3,5-trimethoxybenzene was used as an internal standard. In all cases, a stock solution (0.05 M) of this was added to aliquots of the reaction mixture prior to NMR sample preparation. Batch reactors, 125 W and 400 W medium pressure mercury lamps were purchased from Photochemical Reactors Ltd. Reading. In all cases, Pyrex immersion wells were used for irradiations.

## Synthesis of Thioxanthone Derivatives

### Newman-Kwart Rearrangements

Substituted thiosalicylic acids were prepared from the corresponding methyl thiosalicylic acids via a Newman-Kwart rearrangement as shown (Scheme S1). The thermal Newman-Kwart rearrangement was successfully carried out as a melt for 4-substituted derivatives but the 5-substituted derivatives resulted in extensive degradation.

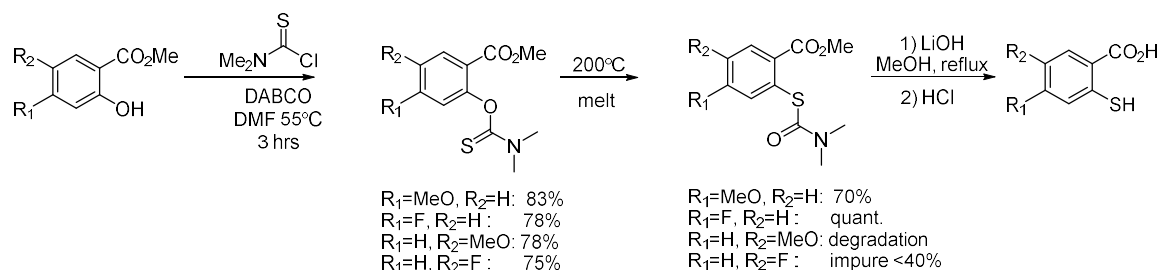

**Scheme S1:** Synthesis of thiosalicylic acids

A modification of the photoredox mediated Newman-Kwart rearrangement developed by Nicewicz<sup>1</sup> gave the 5-methoxysalicylate derivative in excellent yield (Scheme S2). Unfortunately, the 5-fluoro derivative failed to react under the photoredox conditions.

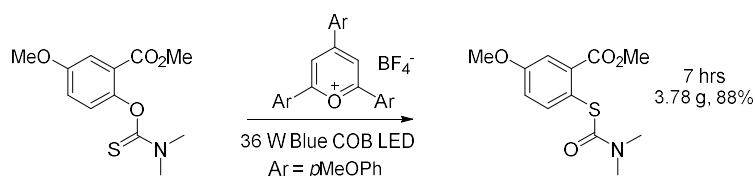

**Scheme S2:** Photoredox mediated Newman-Kwart

### Synthesis of *O*-aryl thiocarbamates

To a solution of the relevant methyl salicylate derivative (200 mmol) and dimethylthiocarbamoyl chloride (37.1 g, 300 mmol) in DMF (100 ml) was added DABCO (33.7 g, 300 mmol) before heating at 55°C for 3 hrs. The mixture was poured over water (500 ml) and extracted with EtOAc (3×300 ml). The combined extracts were dried ( $\text{MgSO}_4$ ), filtered and evaporated to a yellow solid which was washed with  $\text{Et}_2\text{O}$  and dried to give the thiocarbamate as a colourless powder.

#### 4-methoxythiosalicylic acid

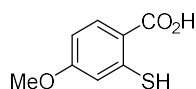

4-methoxythiosalicylic acid

The general procedure for *O*-aryl thiocarbamate synthesis was first followed using methyl 4-methoxysalicylate (45 g, 247 mmol), dimethylthiocarbamoyl chloride (42.7 g, 346 mmol) and DABCO (38.8 g, 346 mmol). After heating at 55°C for 3 hrs the work-up procedure was followed to give methyl 2-((dimethylcarbamothioyl)oxy)-4-methoxybenzoate as a colourless powder (55.2 g, 83%); m.p. 128-129°C (lit. 122-124 °C)<sup>2</sup>

The *O*-aryl thiocarbamate (57.8 g, 215 mmol) was then heated as a melt at 200°C under  $\text{N}_2$  for 5.5 hrs. The cooled mixture was purified by chromatography on silica (40 – 50% EtOAc in petrol) and the concentrated fractions were triturated with  $\text{Et}_2\text{O}$  and filtered to give methyl 2-((dimethylcarbamoyl)thio)-4-methoxybenzoate as a pale orange solid (40.4 g, 70%). To a solution of the *S*-aryl thiocarbamate (40.0 g, 149 mmol) in MeOH (110 ml) was added LiOH (8.91 g, 372 mmol) and the mixture heated at reflux for 2.5 hrs. The cooled solution was quenched with 3M HCl (130 ml), diluted with water (100 ml) and the resulting slurry extracted with EtOAc (500 ml and 2×250 ml). The combined extracts were dried ( $\text{MgSO}_4$ ), filtered and evaporated to give 4-methoxythiosalicylic acid as a white solid (28.0 g) of sufficient purity for further use:  $\delta_{\text{H}}$  (400 MHz,  $\text{DMSO-d}_6$ ) 7.88 (1H, d,  $J$  = 8.8 Hz, Ar.**H**), 7.11 (1H, d,  $J$  = 2.6 Hz, Ar.**H**), 6.75 (1H, dd,  $J$  = 8.8, 2.6 Hz, Ar.**H**), 3.79 (3H, s,  $\text{OCH}_3$ );  $\delta_{\text{C}}$  (101 MHz,  $\text{DMSO-d}_6$ ) 167.3 (C), 161.7 (C), 140.8 (C), 133.3 (CH), 118.8 (C), 115.0 (CH), 110.9 (CH), 55.5 ( $\text{CH}_3$ )

#### 4-fluorothiosalicylic acid

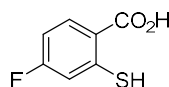

4-fluorothiosalicylic acid

The general procedure for *O*-aryl thiocarbamate synthesis was first followed using methyl 4-fluorosallylate (29.8 ml, 200 mmol), dimethylthiocarbamoyl chloride (37.1 g, 300 mmol) and DABCO (33.7 g, 300 mmol). After heating at 55°C for 3 hrs the work-up procedure was followed to give methyl 2-((dimethylcarbamothioyl)oxy)-4-fluorobenzoate as a colourless powder (42.3 g, 78%); m.p. 106-107°C (lit. 106.8-107.2°C)<sup>3</sup>

The *O*-aryl thiocarbamate (41.0 g, 159 mmol) was heated as a melt at 200°C under  $\text{N}_2$  for 2.5 hrs to give methyl 2-((dimethylcarbamoyl)thio)-4-fluorobenzoate. The resulting material was of sufficient

purity for subsequent hydrolysis. To a solution of the *S*-aryl thiocarbamate (41.0 g, 159 mmol) in MeOH (110 ml) was added LiOH (9.53 g, 398 mmol) and the mixture heated at reflux for 2.5 hrs. The cooled solution was quenched with 3M HCl (140 ml), diluted with water (100 ml) and the resulting slurry extracted with EtOAc (3×250 ml). The combined extracts were washed (1 M HCl, brine), dried (MgSO<sub>4</sub>), filtered and evaporated to give 4-fluorothiosalicylic acid as a white solid (27.6 g) of sufficient purity for further use:  $\delta_{\text{H}}$  (500 MHz, DMSO-*d*<sub>6</sub>) 8.11 (1H, dd, *J* = 8.7, 6.0 Hz, Ar.H), 7.33 (1H, dd, *J* = 10.2, 2.5 Hz, Ar.H), 7.20 (1H, app. td, *J* = 8.2, 2.5 Hz, Ar.H);  $\delta_{\text{C}}$  (126 MHz, DMSO-*d*<sub>6</sub>) 166.8 (C), 164.8 (d, *J* = 253.1 Hz, C), 142.4 (d, *J* = 7.7 Hz, C), 134.7 (d, *J* = 9.8 Hz, CH), 124.8 (d, *J* = 2.8 Hz, C), 113.5 (d, *J* = 21.9 Hz, CH), 111.7 (d, *J* = 26.8 Hz, CH);  $\delta_{\text{F}}$  (377 MHz, CDCl<sub>3</sub>) -105.1

### 5-methoxythiosalicylic acid

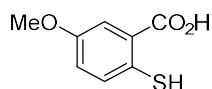

5-methoxythiosalicylic acid

The general procedure for *O*-aryl thiocarbamate synthesis was first followed using methyl 5-methoxysalicylate (29.8 ml, 200 mmol), dimethylthiocarbamoyl chloride (37.1 g, 300 mmol) and DABCO (33.7 g, 300 mmol). After heating at 55°C for 3 hrs the work-up procedure was followed to give methyl 2-((dimethylcarbamothioyl)oxy)-5-methoxybenzoate as a colourless powder (42.3 g, 78%): m.p. 103-104°C (lit. 99.5-100.5°C)<sup>4</sup>

A solution of the *O*-aryl thiocarbamate (4.31 g, 16 mmol) and 2, 4, 6-tris(4-methoxyphenyl)pyrylium tetrafluoroborate (0.08 mmol, 39 mg) in MeCN (80 ml) was irradiated with a 36 W blue COB LED for 7 hrs. The solvent was removed *in vacuo* and chromatography on silica (10% Et<sub>2</sub>O in DCM) yielded methyl 2-((dimethylcarbamoyl)thio)-5-methoxybenzoate as a pale yellow solid (3.78 g, 88%). To a solution of the *S*-aryl thiocarbamate (23.0 g, 85.5 mmol) in MeOH (60 ml) was added LiOH (5.13 g, 214 mmol) and the mixture heated at reflux for 2.5 hrs. The cooled solution was quenched with 3M HCl (80 ml) and the resulting slurry extracted with EtOAc (250 ml and 3×100 ml). The combined extracts were washed (1 M HCl, brine), dried (MgSO<sub>4</sub>), filtered and evaporated to give 5-methoxythiosalicylic acid (15.7 g) as a pale yellow solid of sufficient purity for further use:  $\delta_{\text{H}}$  (400 MHz, DMSO-*d*<sub>6</sub>) 7.42 (1H, d, *J* = 3.0 Hz, Ar.H), 7.41 (1H, d, *J* = 8.7 Hz, Ar.H), 7.04 (dd, *J* = 8.7, 3.0 Hz, Ar.H), 3.75 (3H, s, OCH<sub>3</sub>);  $\delta_{\text{C}}$  (101 MHz, DMSO-*d*<sub>6</sub>) 167.4 (C), 156.4 (C), 131.9 (CH), 128.4 (C), 127.5 (C), 119.6 (CH), 115.4 (CH), 55.3 (CH<sub>3</sub>)

### 5-fluorothiosalicylic acid

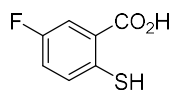

5-fluorothiosalicylic acid

The general procedure for *O*-aryl thiocarbamate synthesis was first followed using methyl 5-fluorosalicylate (40 g, 235 mmol), dimethylthiocarbamoyl chloride (34.9 g, 282 mmol) and DABCO (31.6 g, 282 mmol). After heating at 55°C for 3 hrs the work-up procedure was followed to give methyl 2-((dimethylcarbamothioyl)oxy)-5-fluorobenzoate as a colourless powder (45.3 g, 75%): m.p. 120-121°C

The *O*-aryl thiocarbamate (43.1 g, 168 mmol) was then heated as a melt at 215 °C under N<sub>2</sub> for 5.5 hrs. The cooled mixture was purified by chromatography on silica (30% EtOAc in petrol) to give a dark oil (25.8 g) which contained the *S*-aryl thiocarbamate in approximately 60% purity due to a significant unknown by-product. To the crude mixture in MeOH (100 ml) was added LiOH (6.36 g, 265 mmol) and the solution heated at reflux for 3 hrs. The cooled solution was quenched with 3M HCl (100 ml), extracted with DCM (3×150 ml), the organic extracts concentrated *in vacuo* and re-dissolved in water (150 ml) with K<sub>2</sub>CO<sub>3</sub> (25 g, 181 mmol). The aqueous solution was washed with DCM (2×50 ml) and

acidified with HCl (12 M, 30 ml) to give a pale yellow suspension which was extracted with DCM (3×50 ml). The combined extracts were dried (MgSO<sub>4</sub>), filtered and evaporated to give 5-fluorothiosalicylic acid (9.3 g) containing significant impurities, but of sufficient purity for further use

### Ullmann-Coupling / Friedel-Crafts Cyclization to Thioxanthenes

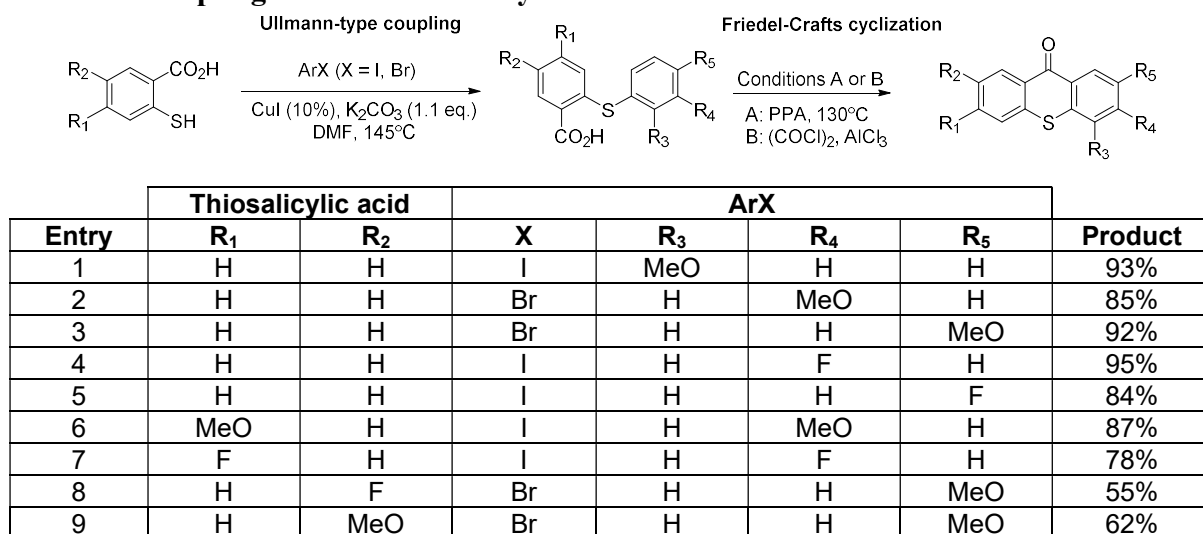

**Table S1:** Ullmann-type coupling of thiosalicylic acids with aryl bromides and iodides

| Entry | Conditions | R <sub>1</sub> | R <sub>2</sub> | R <sub>3</sub> | R <sub>4</sub> | R <sub>5</sub> | Product |
|-------|------------|----------------|----------------|----------------|----------------|----------------|---------|
| 1     | A          | H              | H              | MeO            | H              | H              | 81%     |
| 2     | B          | H              | H              | H              | MeO            | H              | 76%     |
| 3     | A          | H              | H              | H              | H              | MeO            | 49%     |
| 4     | B          | H              | H              | H              | F              | H              | 83%     |
| 5     | A          | H              | H              | H              | H              | F              | 94%     |
| 6     | B          | MeO            | H              | H              | MeO            | H              | 69%     |
| 7     | B          | F              | H              | H              | F              | H              | 84%     |
| 8     | A          | H              | F              | H              | H              | MeO            | 62%     |
| 9     | A          | H              | MeO            | H              | H              | MeO            | 80%     |

**Table S2:** Intramolecular Friedel-Crafts cyclization to thioxanthenes

### 4-methoxythioxanthone (4-MeOTX)

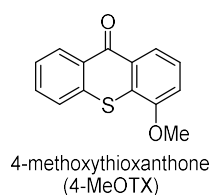

Thiosalicylic acid (30.8 g, 200 mmol) and K<sub>2</sub>CO<sub>3</sub> (30.4 g, 220 mmol) were added to DMF (300 ml) in a 1 L flask. CuI (3.8 g, 20 mmol) and 2-iodoanisole (28.6 ml, 220 mmol) were then added and the mixture heated at 145°C for 19 hrs before cooling and pouring over water (500 ml). The aqueous mixture was filtered before acidifying with 3 M HCl (80 ml). The resulting slurry was filtered and the residue washed with water, stirred in EtOH, filtered again and dried to give 2-((2-methoxyphenyl)thio)benzoic acid as a grey power (48.3 g, 93%).

A mixture of the thioether (52 g, 200 mmol) and polyphosphoric acid (100 g) was heated at 130°C for 1 hr before allowing to cool and quenching with water (150 ml). The mixture was mechanically broken up to a suspension which was extracted with DCM (500 ml). The aqueous solution was further extracted

with DCM (2×250 ml) and the combined extracts washed with sat. aq. NaHCO<sub>3</sub> (2×100 ml), dried (MgSO<sub>4</sub>), filtered and evaporated to a beige solid (41.5 g) which was recrystallized from MeCN (600 ml) to give 4-methoxythioxanthone as a fluffy solid (39.3 g, 81%): m.p. 168 – 169 °C (lit. 165 °C)<sup>5</sup>;  $\lambda_{\text{max}}$ (MeCN)/nm 385 ( $\epsilon/\text{M}^{-1}\text{cm}^{-1}$  5,940);  $\delta_{\text{H}}$  (400 MHz, CDCl<sub>3</sub>) 8.60 (1H, app. d,  $J$  = 8.1 Hz), 8.25 (1H, app. d,  $J$  = 8.4 Hz), 7.66 – 7.58 (2H, m), 7.50 – 7.41 (2H, m), 7.13 (1H, app. d,  $J$  = 7.9 Hz), 4.03 (3H, s, OCH<sub>3</sub>);  $\delta_{\text{C}}$  (101 MHz, CDCl<sub>3</sub>) 180.2 (C), 154.5 (C), 137.5 (C), 132.3 (CH), 130.4 (C), 129.8 (CH), 129.1 (C), 127.7 (C), 126.8 (CH), 126.4 (CH), 126.1 (CH), 121.8 (CH), 112.33 (CH) 56.6 (CH<sub>3</sub>); ESI-HRMS  $m/z$  243.0474 (MH<sup>+</sup> C<sub>14</sub>H<sub>11</sub>O<sub>2</sub>S requires 243.0474)

### 3-methoxythioxanthone (3-MeOTX)

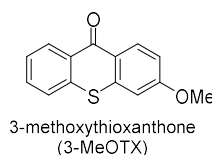

Thiosalicylic acid (30.8 g, 200 mmol) and K<sub>2</sub>CO<sub>3</sub> (30.4 g, 220 mmol) were added to DMF (400 ml) in a 1 L flask. CuI (3.8 g, 20 mmol) and 3-bromoanisole (27.9 ml, 220 mmol) were then added and the mixture heated at 145°C for 20 hrs before cooling and pouring over water (600 ml). The aqueous mixture was filtered before acidifying with 3 M HCl (90 ml). The resulting slurry was filtered and the residue washed with water, stirred in EtOH, filtered again and dried to give 2-((3-methoxyphenyl)thio)benzoic acid as a grey power (44.2 g, 85%).

A mixture of the thioether (10 g, 38.4 mmol) in anhydrous DCM (70 ml) with a few drops of DMF was cooled in an ice bath before the addition of (COCl)<sub>2</sub> (3.9 ml, 46 mmol). The stirred mixture was removed from the ice bath until the reaction had reached completion before removing the solvent *in vacuo*. The residue was re-dissolved in anhydrous DCM (100 ml) and the solution cooled in an ice bath before the addition of AlCl<sub>3</sub> (6.13 g, 46 mmol). After stirring overnight the mixture was quenched with water, extracted with DCM (3×150 ml), washed with sat. aq. NaHCO<sub>3</sub>, dried (MgSO<sub>4</sub>), filtered and evaporated to a beige solid (9 g) which was recrystallized from MeCN (50 ml) to give 3-methoxythioxanthone as an off-white powder (7.1 g, 76%): m.p. 133 – 134 °C (lit. 129 °C)<sup>4</sup>;  $\lambda_{\text{max}}$ (MeCN)/nm 367 ( $\epsilon/\text{M}^{-1}\text{cm}^{-1}$  5,550);  $\delta_{\text{H}}$  (400 MHz, CDCl<sub>3</sub>) 8.62 – 8.58 (1H, m), 8.55 (1H, d,  $J$  = 9.0 Hz), 7.62 – 7.51 (2H, m), 7.49 – 7.44 (1H, m), 7.03 (1H, dd,  $J$  = 9.0, 2.5 Hz), 6.96 (1H, d,  $J$  = 2.4 Hz), 3.92 (3H, s, OCH<sub>3</sub>);  $\delta_{\text{C}}$  (101 MHz, CDCl<sub>3</sub>) 179.2 (C), 162.7 (C), 139.7 (C), 137.1 (C), 132.1 (CH), 132.1 (CH), 129.9 (CH), 129.5 (C), 126.4 (CH), 125.9 (CH), 123.2 (C), 115.3 (CH), 108.2 (CH), 55.8 (CH<sub>3</sub>); ESI-HRMS  $m/z$  243.0475 (MH<sup>+</sup> C<sub>14</sub>H<sub>11</sub>O<sub>2</sub>S requires 243.0474)

### 2-methoxythioxanthone (2-MeOTX)

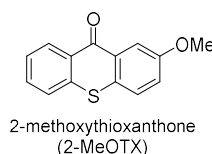

Thiosalicylic acid (30.8 g, 200 mmol) and K<sub>2</sub>CO<sub>3</sub> (30.4 g, 220 mmol) were added to DMF (300 ml) in a 1 L flask. CuI (3.8 g, 20 mmol) and 4-bromoanisole (27.9 ml, 220 mmol) were then added and the mixture heated at 145°C for 20 hrs before cooling and pouring over water (600 ml). The aqueous mixture was filtered before acidifying with 3 M HCl (90 ml). The resulting slurry was filtered and the residue washed with water, stirred in MeOH, filtered again and dried to give 2-((4-methoxyphenyl)thio)benzoic acid as a grey power (47.8 g, 92%).

A mixture of the thioether (46 g, 177 mmol) and polyphosphoric acid (180 g) was heated at 130°C for 4.5 hrs before allowing to cool and quenching with water (150 ml). The mixture was mechanically broken up to a suspension which was extracted with DCM, washed with sat. aq. NaHCO<sub>3</sub>, dried (MgSO<sub>4</sub>), filtered and evaporated to a yellow solid (25) which was recrystallized from MeCN (200 ml)



to give 2-methoxythioxanthone as a fluffy yellow solid (20.8 g, 49%): m.p. 128 – 129 °C (lit. 129 °C)<sup>6</sup>;  $\lambda_{\text{max}}$ (MeCN)/nm 399 ( $\epsilon/\text{M}^{-1}\text{cm}^{-1}$  6,050);  $\delta_{\text{H}}$  (400 MHz,  $\text{CDCl}_3$ ) 8.65 – 8.61 (1H, m), 8.08 (1H, d,  $J$  = 2.9 Hz), 7.64 – 7.56 (2H, m), 7.51 – 7.45 (2H, m), 7.26 (1H, dd,  $J$  = 8.8, 3.0 Hz), 3.94 (3H, s,  $\text{OCH}_3$ );  $\delta_{\text{C}}$  (101 MHz,  $\text{CDCl}_3$ ) 179.8 (C), 158.6 (C), 137.7 (C), 132.2 (CH), 130.4 (C), 130.0 (CH), 129.3 (C), 128.8 (C), 127.4 (CH), 126.2 (CH), 126.1 (CH), 122.9 (CH), 110.5 (CH), 55.9 ( $\text{CH}_3$ ); ESI-HRMS  $m/z$  243.0476 ( $\text{MH}^+$   $\text{C}_{14}\text{H}_{11}\text{O}_2\text{S}$  requires 243.0474)

### 3-fluorothioxanthone (3-FTX)

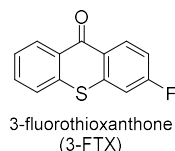

Thiosalicylic acid (30.8 g, 200 mmol) and  $\text{K}_2\text{CO}_3$  (30.4 g, 220 mmol) were added to DMF (300 ml) in a 1 L flask.  $\text{CuI}$  (3.8 g, 20 mmol) and 3-fluoriodobenzene (25.8 ml, 220 mmol) were then added and the mixture heated at 145°C for 19 hrs before cooling and pouring over water (500 ml). The aqueous mixture was filtered before acidifying with 3 M  $\text{HCl}$  (90 ml). The resulting slurry was filtered and the residue washed with water, stirred in hot  $\text{MeOH}$  (70 ml), filtered again and dried to give 2-((3-fluorophenyl)thio)benzoic acid as a grey power (47.1 g, 95%).

To a stirred mixture of the thioether (10 g, 40.3 mmol) in anhydrous DCM (90 ml) with a few drops of DMF was added  $(\text{COCl})_2$  (4.1 ml, 48.5 mmol). When the reaction had reached full conversion after 3 hrs the solvent was removed *in vacuo*, the residue was re-dissolved in anhydrous DCM (130 ml) and the solution cooled in an ice bath before the addition of  $\text{AlCl}_3$  (6.5 g, 48.7 mmol). After stirring for 1 hr the mixture was quenched with water (80 ml) and extracted with DCM (3×150 ml). The combined organic extracts were washed with sat. aq.  $\text{NaHCO}_3$ , dried ( $\text{MgSO}_4$ ), filtered and evaporated to a beige solid which was recrystallized from  $\text{MeCN}$  (90 ml) to give 3-fluorothioxanthone as a colourless powder (7.7 g, 83%): m.p. 166 – 167 °C;  $\lambda_{\text{max}}$ (MeCN)/nm 370 ( $\epsilon/\text{M}^{-1}\text{cm}^{-1}$  5,710);  $\delta_{\text{H}}$  (400 MHz,  $\text{CDCl}_3$ ) 8.63 (1H, dd,  $J$  = 9.0, 6.0 Hz), 8.61 – 8.57 (1H, m), 7.62 (1H, ddd,  $J$  = 8.4, 7.0, 1.5 Hz), 7.56 – 7.52 (1H, m), 7.49 (1H, ddd,  $J$  = 8.2, 7.0, 1.3 Hz), 7.24 (1H, dd,  $J$  = 8.8, 2.5 Hz), 7.17 (1H, ddd,  $J$  = 9.0, 8.0, 2.5 Hz);  $\delta_{\text{C}}$  (101 MHz,  $\text{CDCl}_3$ ) 179.1 (C), 164.8 (d,  $J$  = 256.8 Hz, C), 139.8 (d,  $J$  = 10.2 Hz, C), 136.9 (C), 133.2 (d,  $J$  = 9.9 Hz, CH), 132.5 (CH), 130.0 (CH), 129.2 (C), 126.8 (CH), 126.1 (d,  $J$  = 2.1 Hz, C), 126.0 (CH), 115.1 (d,  $J$  = 22.5 Hz, CH), 112.0 (d,  $J$  = 24.6 Hz, CH);  $\delta_{\text{F}}$  (376 MHz,  $\text{CDCl}_3$ ) -104.8; ESI-HRMS  $m/z$  231.0271 ( $\text{MH}^+$   $\text{C}_{13}\text{H}_8\text{OFS}$  requires 231.0274)

### 2-fluorothioxanthone (2-FTX)

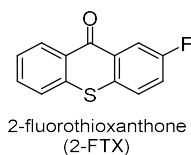

Thiosalicylic acid (30.8 g, 200 mmol) and  $\text{K}_2\text{CO}_3$  (30.4 g, 220 mmol) were added to DMF (400 ml) in a 1 L flask.  $\text{CuI}$  (3.8 g, 20 mmol) and 4-fluoriodobenzene (24.2 ml, 220 mmol) were then added and the mixture heated at 145°C for 12 hrs before cooling and pouring over water (500 ml). The aqueous mixture was filtered before acidifying with 3 M  $\text{HCl}$  (90 ml). The resulting slurry was filtered and the residue washed with water, stirred in hot  $\text{MeOH}$  (70 ml), filtered again and dried to give 2-((4-fluorophenyl)thio)benzoic acid as a grey power (41.9 g, 84%).

A mixture of the thioether (40.5 g, 163 mmol) and polyphosphoric acid (150 g) was heated at 130°C for 11 hrs before allowing to cool and quenching with water (150 ml). The mixture was mechanically broken up to a suspension which was extracted with DCM (500 ml). The aqueous solution was further extracted with DCM (2×250 ml) and the combined extracts washed with sat. aq.  $\text{NaHCO}_3$  (2×100 ml), dried ( $\text{MgSO}_4$ ), filtered and evaporated to give 2-fluorothioxanthone as an off white solid (35.4 g, 94%):

m.p. 170 – 171 °C (lit. 171 °C)<sup>7</sup>;  $\lambda_{\text{max}}$ (MeCN)/nm 388 ( $\epsilon/\text{M}^{-1}\text{cm}^{-1}$  6,310);  $\delta_{\text{H}}$  (400 MHz,  $\text{CDCl}_3$ ) 8.63 – 8.58 (1H, m), 8.29 (1H, dd,  $J = 9.6, 2.9$  Hz), 7.66 – 7.54 (3H, m), 7.49 (1H, ddd,  $J = 8.2, 6.9, 1.4$  Hz), 7.38 (1H, ddd,  $J = 8.8, 7.5, 2.9$  Hz);  $\delta_{\text{C}}$  (101 MHz,  $\text{CDCl}_3$ ) 179.3 (d,  $J = 2.4$  Hz, C), 161.3 (d,  $J = 247.6$  Hz, C), 137.3 (C), 132.7 (d,  $J = 2.4$  Hz, C), 132.6 (CH), 131.0 (d,  $J = 6.5$  Hz, C), 130.1 (CH), 128.43 (C), 128.1 (d,  $J = 7.4$  Hz, CH), 126.7 (CH), 126.1 (CH), 121.2 (d,  $J = 24.2$  Hz, CH), 115.5 (d,  $J = 22.9$  Hz, CH);  $\delta_{\text{F}}$  (376 MHz,  $\text{CDCl}_3$ ) -113.6; ESI-HRMS  $m/z$  231.0270 ( $\text{MH}^+$   $\text{C}_{13}\text{H}_8\text{OFS}$  requires 231.0274)

### 3,6-dimethoxythioxanthone (3,3'-MeOTX)

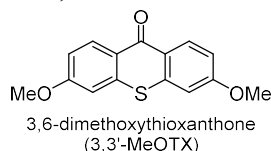

4-Methoxythiosalicylic acid (17.6 g, 96 mmol) and  $\text{K}_2\text{CO}_3$  (14.6 g, 106 mmol) were added to DMF (200 ml) in a 1 L flask.  $\text{CuI}$  (1.83 g, 9.6 mmol) and 3-bromoanisole (13.4 ml, 106 mmol) were then added and the mixture heated at 145°C for 2.5 hrs before cooling and pouring over water (300 ml). The aqueous mixture was filtered before acidifying with 3 M  $\text{HCl}$  (40 ml). The resulting slurry was filtered and the residue washed with water, dissolved in  $\text{EtOAc}$  (300 ml), washed with brine, dried ( $\text{MgSO}_4$ ) and filtered. The solution was evaporated *in vacuo* to give 4-methoxy-2-((3-methoxyphenyl)thio)benzoic acid as a white power (24.2 g, 87%).

To a stirred mixture of the thioether (10 g, 34.4 mmol) in anhydrous DCM (70 ml) with a few drops of DMF was added  $(\text{COCl})_2$  (3.5 ml, 41.3 mmol). When the reaction had reached full conversion after 1 hr the solvent was removed *in vacuo*, the residue was re-dissolved in anhydrous DCM (130 ml) and the solution cooled in an ice bath before the addition of  $\text{AlCl}_3$  (5.51 g, 41.3 mmol). After stirring for 1 hr the mixture was quenched with water (50 ml) and extracted with DCM (3×150 ml). The combined organic extracts were washed with sat. aq.  $\text{NaHCO}_3$ , dried ( $\text{MgSO}_4$ ), filtered and evaporated to a beige solid (9.2 g) which was recrystallized from MeCN (90 ml) to give 3,6-dimethoxythioxanthone as a colourless powder (6.5 g, 69%): m.p. 175°C;  $\lambda_{\text{max}}$ (MeCN)/nm 354 ( $\epsilon/\text{M}^{-1}\text{cm}^{-1}$  5,850);  $\delta_{\text{H}}$  (400 MHz,  $\text{CDCl}_3$ ) 8.52 (2H, d,  $J = 9.0$  Hz), 7.00 (2H, dd,  $J = 9.0, 2.5$  Hz), 6.92 (2H, d,  $J = 2.5$  Hz), 3.91 (6H, s,  $\text{OCH}_3$ );  $\delta_{\text{C}}$  (101 MHz,  $\text{CDCl}_3$ ) 178.5 (C), 162.4 (C), 139.3 (C), 132.0 (CH), 123.3 (C), 114.9 (CH), 108.2 (CH), 55.8 ( $\text{CH}_3$ ); ESI-HRMS  $m/z$  273.0572 ( $\text{MH}^+$   $\text{C}_{15}\text{H}_{13}\text{O}_3\text{S}$  requires 273.0580)

### 3,6-difluorothioxanthone (3,3'-FTX)

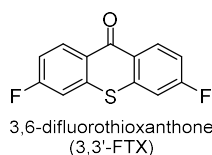

4-Fluorothiosalicylic acid (27 g, 157 mmol) and  $\text{K}_2\text{CO}_3$  (24.2 g, 175 mmol) were added to DMF (250 ml) in a 1 L flask.  $\text{CuI}$  (3.1 g, 16 mmol) and 3-fluoroiodobenzene (20.6 ml, 175 mmol) were then added and the mixture heated at 145°C for 3 hrs before cooling and pouring over water (400 ml). The aqueous mixture was filtered before acidifying with 3 M  $\text{HCl}$  (70 ml). The resulting slurry was filtered and the residue washed with water, stirred in hot MeOH (80 ml), filtered again and dried to give 4-fluoro-2-((3-fluorophenyl)thio)benzoic acid as a white power (32.5 g, 78%).

To a stirred mixture of the thioether (10 g, 37.6 mmol) in anhydrous DCM (90 ml) with a few drops of DMF was added  $(\text{COCl})_2$  (3.8 ml, 45 mmol). When the reaction had reached full conversion after 2 hrs the solvent was removed *in vacuo*, the residue was re-dissolved in anhydrous DCM (130 ml) and the solution cooled in an ice bath before the addition of  $\text{AlCl}_3$  (6.0 g, 45 mmol). After stirring for 1 hr the mixture was quenched with water (80 ml) and extracted with DCM (3×150 ml). The combined organic extracts were washed with sat. aq.  $\text{NaHCO}_3$ , dried ( $\text{MgSO}_4$ ), filtered and evaporated to a pale orange solid (9.0 g) which was recrystallized from MeCN (100 ml) to give 3,6-difluorothioxanthone as a

colourless powder (7.8 g, 84%): m.p. 207 – 208 °C;  $\lambda_{\text{max}}$ (MeCN)/nm 361 ( $\epsilon/\text{M}^{-1}\text{cm}^{-1}$  5,290);  $\delta_{\text{H}}$  (400 MHz,  $\text{CDCl}_3$ ) 8.62 (2H, dd,  $J = 9.0, 5.8$  Hz), 7.25 – 7.16 (4H, m);  $\delta_{\text{C}}$  (101 MHz,  $\text{CDCl}_3$ ) 178.0 (C), 164.8 (d,  $J = 257.2$  Hz, C), 139.2 (d,  $J = 10.0$  Hz, C), 133.3 (d,  $J = 10.0$  Hz, CH), 125.9 (d,  $J = 2.5$  Hz, C), 115.4 (d,  $J = 22.3$  Hz, CH), 112.0 (d,  $J = 24.8$  Hz, CH);  $\delta_{\text{F}}$  (376 MHz,  $\text{CDCl}_3$ ) -104.5; ESI-HRMS  $m/z$  249.0174 ( $\text{MH}^+$   $\text{C}_{13}\text{H}_7\text{OF}_2\text{S}$  requires 249.0180)

### 2-methoxy,7-fluorothioxanthone (2-F,2'-MeOTX)

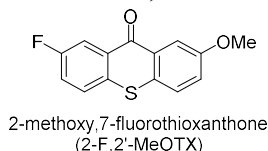

5-Fluorothiosalicylic acid (9.3 g, 54 mmol) and  $\text{K}_2\text{CO}_3$  (7.5 g, 54 mmol) were added to DMF (100 ml) in a 250 ml flask.  $\text{CuI}$  (0.95 g, 5.0 mmol) and 4-bromoanisole (6.8 ml, 54 mmol) were then added and the mixture heated at 145°C for 23 hrs before cooling and pouring over water (200 ml). The aqueous mixture was filtered through celite before acidifying with 3 M  $\text{HCl}$  (25 ml). The resulting slurry was filtered and the residue dissolved in  $\text{EtOAc}$  (200 ml), dried ( $\text{MgSO}_4$ ) and filtered. The solution was evaporated *in vacuo* to a slurry which was washed with  $\text{Et}_2\text{O}$  and dried to give 5-fluoro-2-((4-methoxyphenyl)thio)benzoic acid as a white powder (8.2 g, 55%).

A mixture of the thioether (1.0 g, 3.6 mmol) and polyphosphoric acid (5 ml) was heated at 120°C for 1 hr before allowing to cool and quenching with water (10 ml). The mixture was mechanically broken up to a suspension which was extracted with DCM and  $\text{Et}_2\text{O}$ . The combined extracts were dried ( $\text{MgSO}_4$ ), filtered and evaporated to a yellow solid (0.68 g) which was recrystallized from MeCN (12 ml) to give 2-methoxy,7-fluorothioxanthone as a fluffy yellow powder (858 mg, 62%); m.p. 160 – 161°C;  $\lambda_{\text{max}}$ (MeCN)/nm 408 ( $\epsilon/\text{M}^{-1}\text{cm}^{-1}$  6,220);  $\delta_{\text{H}}$  (400 MHz,  $\text{CDCl}_3$ ) 8.29 (1H, dd,  $J = 9.7, 2.9$  Hz), 8.04 (1H, d,  $J = 2.9$  Hz), 7.57 (1H, dd,  $J = 8.8, 4.8$  Hz), 7.49 (1H, d,  $J = 8.8$  Hz), 7.41 – 7.33 (1H, m), 7.30 – 7.24 (1H, m), 3.94 (3H, s);  $\delta_{\text{C}}$  (101 MHz,  $\text{CDCl}_3$ ) 179.0 (d,  $J = 2.3$  Hz, C), 161.2 (d,  $J = 247.3$  Hz, C), 158.7 (C), 132.94 (d,  $J = 2.4$  Hz, C), 130.3 (d,  $J = 6.5$  Hz, C), 129.5 (C), 129.2 (C), 128.1 (d,  $J = 7.5$  Hz, CH), 127.4 (CH), 123.2 (CH), 121.0 (d,  $J = 24.2$  Hz, CH), 115.4 (d,  $J = 22.8$  Hz, CH), 110.4 (d,  $J = 1.5$  Hz, CH), 55.8 ( $\text{CH}_3$ );  $\delta_{\text{F}}$  (376 MHz,  $\text{CDCl}_3$ ) -113.9; ESI-HRMS  $m/z$  261.0376 ( $\text{MH}^+$   $\text{C}_{14}\text{H}_{10}\text{O}_2\text{FS}$  requires 261.0380)

### 2,7-dimethoxythioxanthone (2,2'-MeOTX)

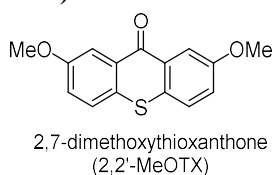

5-Methoxythiosalicylic acid (15.5 g, 84 mmol) and  $\text{K}_2\text{CO}_3$  (12.8 g, 93 mmol) were added to DMF (200 ml) in a 1 L flask.  $\text{CuI}$  (1.6 g, 8.4 mmol) and 4-bromoanisole (13.4 ml, 93 mmol) were then added and the mixture heated at 145°C for 23 hrs before cooling and pouring over water (300 ml). The aqueous mixture was filtered before acidifying with 3 M  $\text{HCl}$  (40 ml). The resulting slurry was filtered and the residue, dissolved in  $\text{EtOAc}$  (200 ml), washed with brine, dried ( $\text{MgSO}_4$ ) and filtered. The solution was evaporated *in vacuo* to a slurry which was washed with  $\text{Et}_2\text{O}$  and dried to give 5-methoxy-2-((4-methoxyphenyl)thio)benzoic acid as an off white solid (15.1 g, 62%).

A mixture of the thioether (13.9 g, 48 mmol) and polyphosphoric acid (130 g) was heated at 120°C for 1 hr before allowing to cool and quenching with water (100 ml). The mixture was mechanically broken up to a suspension which was extracted with DCM, washed with sat. aq.  $\text{NaHCO}_3$ , dried ( $\text{MgSO}_4$ ), filtered and evaporated to a yellow solid (11.8 g) which was recrystallized from MeCN (155 ml) to give 2,7-dimethoxythioxanthone as a fluffy yellow solid (10.5 g, 80%); m.p. 155 – 157 °C;  $\lambda_{\text{max}}$ (MeCN)/nm

415 ( $\epsilon/M^{-1}cm^{-1}$  6,270);  $\delta_H$  (400 MHz,  $CDCl_3$ ) 8.08 (2H, d,  $J = 2.9$  Hz), 7.49 (2H, d,  $J = 8.9$  Hz), 7.25 (2H, dd,  $J = 8.9, 2.9$  Hz), 3.94 (6H, s);  $\delta_C$  (101 MHz,  $CDCl_3$ ) 179.5 (C), 158.4 (C), 129.7 (C), 129.6 (C), 127.5 (CH), 122.8 (CH), 110.4 (CH), 55.8 ( $CH_3$ ); ESI-HRMS  $m/z$  273.0573 ( $MH^+$   $C_{15}H_{13}O_3S$  requires 273.0580)

## UV-Vis Spectra of Thioxanthone Derivatives

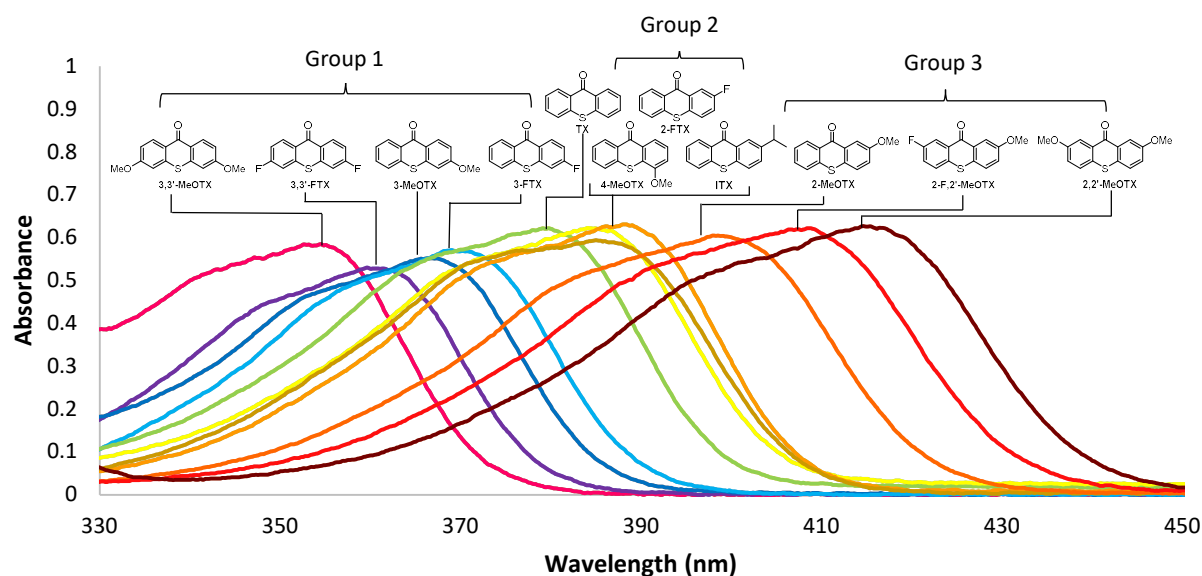

**Figure S1:** Composite UV-vis spectra of TX derivatives (MeCN,  $1 \times 10^{-4}$  M)

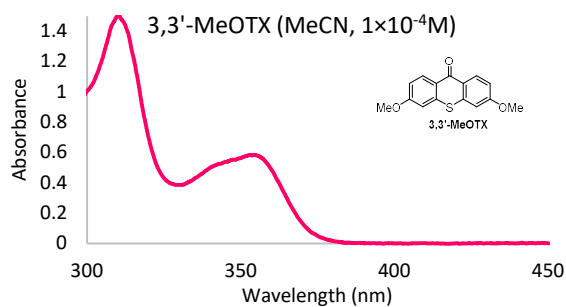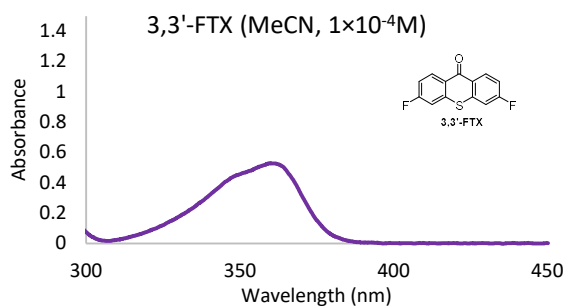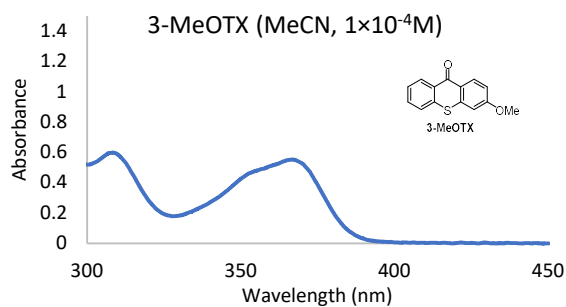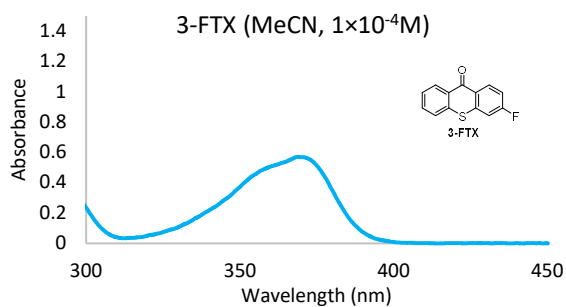

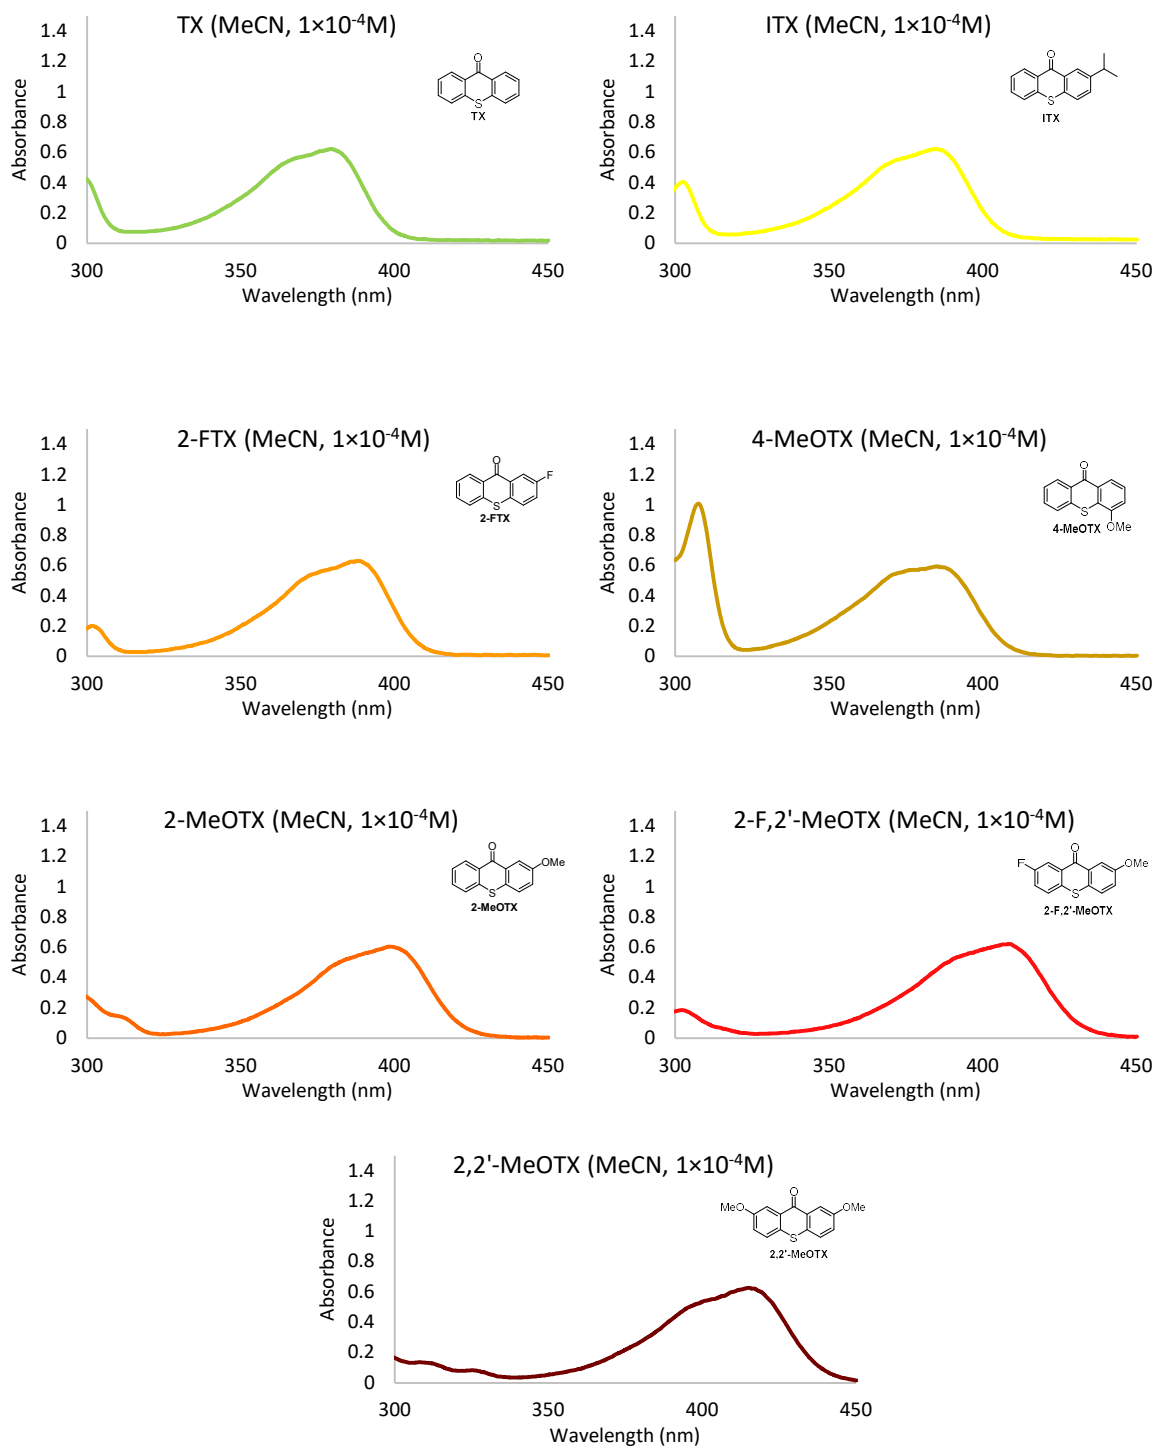

**Figure S2:** Individual UV-vis absorption spectra of TX derivatives

## Triplet Measurements of Thioxanthone Derivatives

### Low temperature (77 K) emission measurement:

The low temperature emission spectra were measured in FLS900 Fluorescence spectrometer (Edinburgh Instrument). The room temperature absorption spectra were measured in UV-Vis spectrometer (Agilent Cary 60). For all the measurements 10  $\mu$ M concentration was used. Methylcyclohexane (Alfa Aesar), 2-methyl tetrahydrofuran (Alfa Aesar) were used as received.

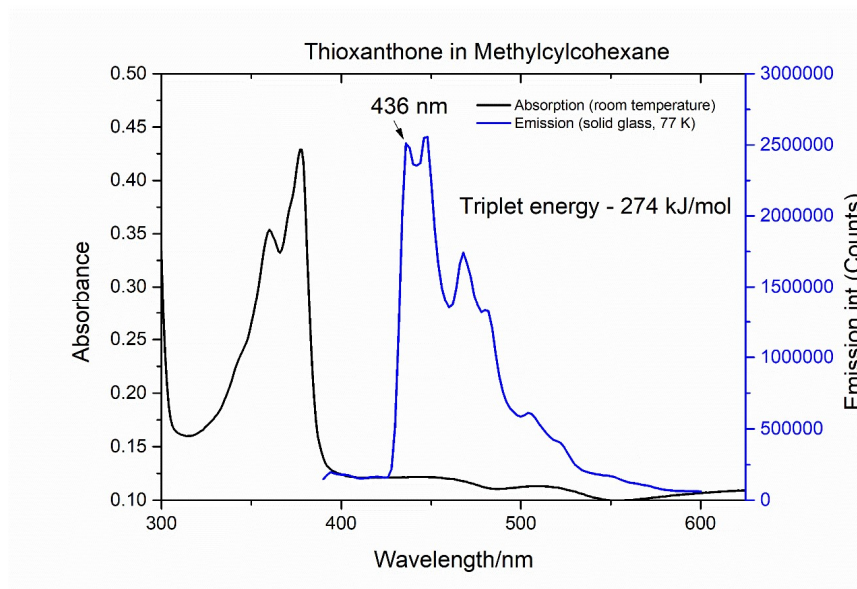

**Figure S3:** Room temperature absorption and glass temperature emission spectra of thioxanthone in methylcyclohexane. The excitation wavelength was 380 nm.

In Figure S3, the room temperature absorption and glass temperature emission spectra are presented for the thioxanthone. It is well known that the thioxanthone is nonemissive in nonpolar solvents at room temperature. Therefore, the strong red-shifted emission observed in nonpolar solvent (Methylcyclohexane) at glass temperature is safely assigned to the emission from the triplet state. The highest energy emission band (436 nm) is used as the lowest triplet energy and it matches well with the reported triplet energy of thioxanthone. The emission and absorption spectra of other molecules are presented in Figure S4

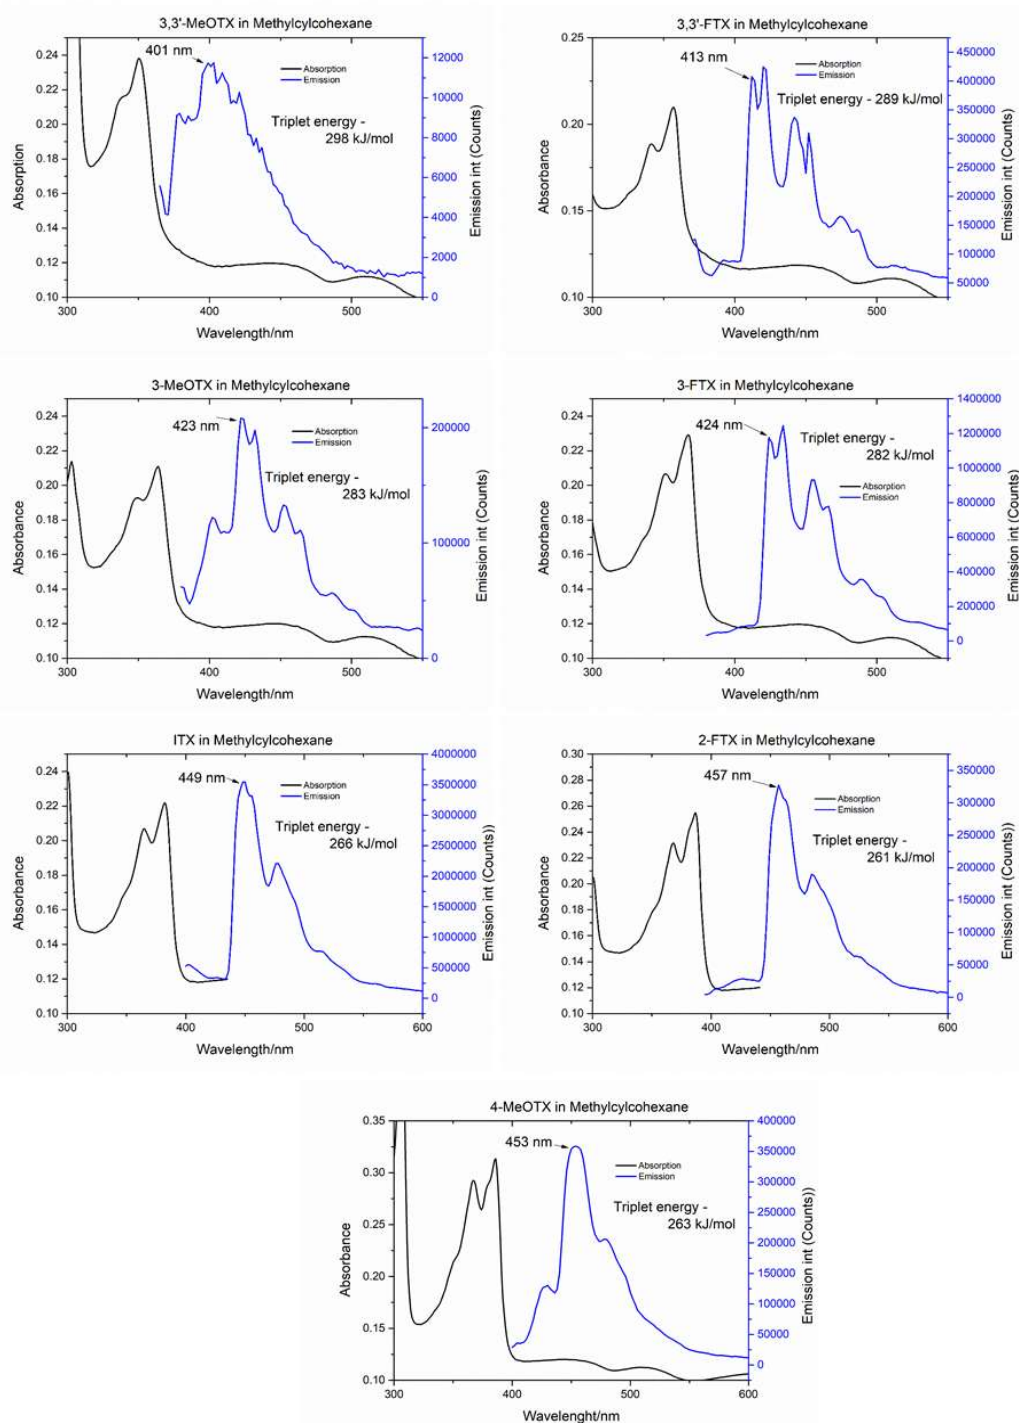

**Figure S4.** Room temperature absorption and glass temperature emission spectra of different thioxathone derivatives in methylcyclohexane. The lowest energy bands are mentioned and the calculated triplet energies are reported. The excitation wavelengths are: 350 nm (3,3'- MeOTX), 360 nm (3,3'-FTX), 370 nm (3-MeOTX), 375 nm (3-FTX), 380 nm (ITX), 385 nm (2-FTX), 390 nm (4-MeOTX) respectively.

The emission results at 77K in 2-MeTHF for the last three derivatives, 2-MeOTX, 2-F,2'-MeOTX, 2,2'-MeOTX are shown in Figure S5

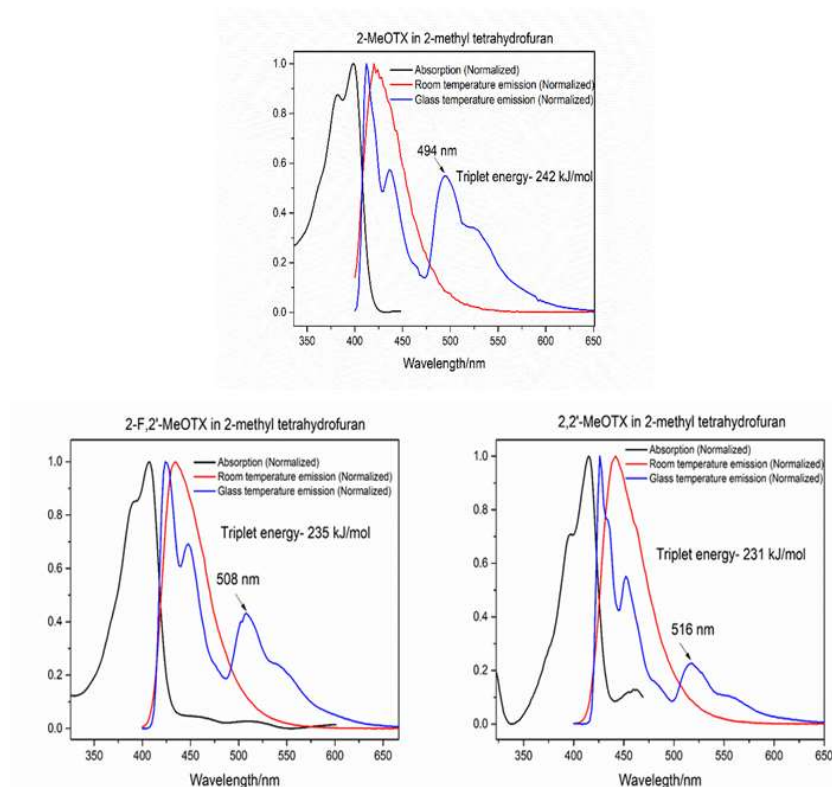

**Figure S5.** Room temperature absorption, room temperature emission and 77K emission of the thioxanthone derivatives in 2-methyl tetrahydrofuran. For all the measurements 390 nm excitation wavelength was used. Here we have plotted all the spectra with x-axis normalized.

## ps and ns TRIR Studies

### Instrumentation

We performed ps and ns time-resolved infrared (TRIR) measurements in order to measure the singlet and triplet lifetimes. All the measurements were performed in  $\text{CD}_3\text{CN}$  (1 mM). Each solution was degassed using three freeze pump thaw cycles before time-resolved measurements. The sample Harrick cell (path length 400  $\mu\text{m}$ ) with  $\text{CaF}_2$  windows was continuously raster scan in order to avoid photodamage. The detailed description of the TRIR measurements at the Nottingham has been discussed in detail elsewhere.<sup>8</sup> Briefly, 800 nm, 100 fs, 80 MHz fundamental pulses are generated with a commercial Ti:Sapphire oscillator (MaiTai). The input pulses are amplified in a Ti:Sapphire amplifier (Spitfire Pro/Spectra Physics) to produce 800 nm, 100 fs, 1 kHz, 2 mJ pulses. Half of the output is used to pump a TOPAS-C (Light Conversion) that produces tunable IR pulses using a difference frequency generator. The other part of the amplifier output is used to pump a harmonic generator (Timeplate tripler, Minioptic Technology) to produce 400 nm, 100 fs pump pulses. For 355 nm picosecond experiments, we have used a second TOPAS output pumped by the 800 nm fundamental. The IR beam passes through a Ge beam splitter and half of the IR beam is reflected onto a single element MCT detector (Kolmar Technology) to serve as a reference and the other half is focused and overlaps with the pump beam at the sample position. The pump pulse was delayed relative to the probe pulse by using a translation stage (LMA Actuator, Aerotech, USA). The polarization of the pump pulse was set at the magic angle ( $54.7^\circ$ ) relative to the probe pulse to avoid rotational diffusion. For a measurement with a longer time delays a Q-switched Nd:YVO ns-laser (ACE- 25QSPXHP/MOPA, Advanced Optical Technology, UK) was employed as a pump source and this was synchronized relative to the Spitfire Pro amplifier output. The IR probe beam was dispersed with a spectrograph and detected with a 128 element HgCdTe linear array detector (Infrared Associates, USA).



## ps (400 nm excitation) TRIR spectra and kinetics of ITX

The ps and ns TRIR spectra of ITX in  $\text{CD}_3\text{CN}$  as the photophysical properties (singlet lifetime, triplet quantum yield) are well known. The ps TRIR spectra of ITX in the  $1650\text{--}1450\text{ cm}^{-1}$  region for selected time delays after 400 nm excitation were presented in Figure S6. The negative peaks at  $1637$  and  $1592\text{ cm}^{-1}$  are associated with the ground state bleach and are assigned to  $\nu(\text{C}=\text{O})$  and  $\nu(\text{C}=\text{C})$  bands respectively. The transient peak at  $1477\text{ cm}^{-1}$  appears immediately after the flash and is assigned to the singlet excited state. The  $1477\text{ cm}^{-1}$  band decays at the same rate ( $240 \pm 10\text{ ps}$ ) as a new band at  $1518\text{ cm}^{-1}$  grows in and this peak is assigned to the triplet state.

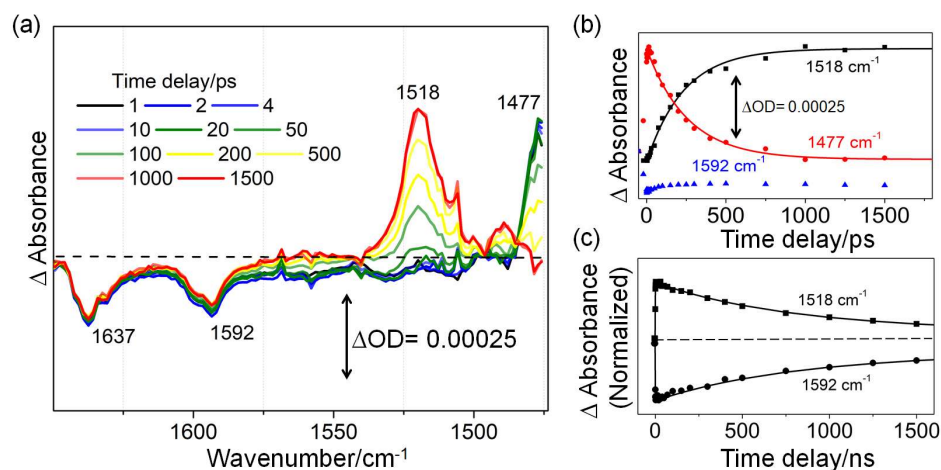

**Figure S6.** (a) ps-TRIR spectra of ITX for selected time delays in  $\text{CD}_3\text{CN}$  following photoexcitation (400 nm). (b) and (c) show selected TRIR kinetic traces associated with the formation and decay of the parent ( $1592\text{ cm}^{-1}$ ), singlet ( $1477\text{ cm}^{-1}$ ) and triplet ( $1518\text{ cm}^{-1}$ ) excited state bands obtained from TRIR spectra.

### Estimation of triplet quantum yield for ITX from the parent bleach recovery kinetics

The triplet quantum yield ( $\Phi_{ISC}$ ) is estimated from the parent bleach recovery kinetics using the approximation that triplet quantum yield is given by the  $\Delta A^{max} / \Delta A^{\infty}$  ratio.

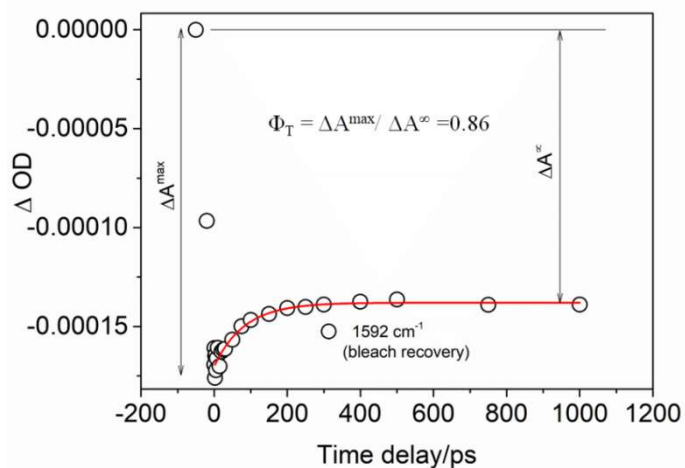

**Figure S7.** ps intensity kinetics of 1592 cm<sup>-1</sup> band. The initial bleach recovery is associated with ground state recovery due to radiative (fluorescence) and nonradiative (internal conversion) decays. The bleach recovery at longer time is used to calculate the triplet quantum yield.

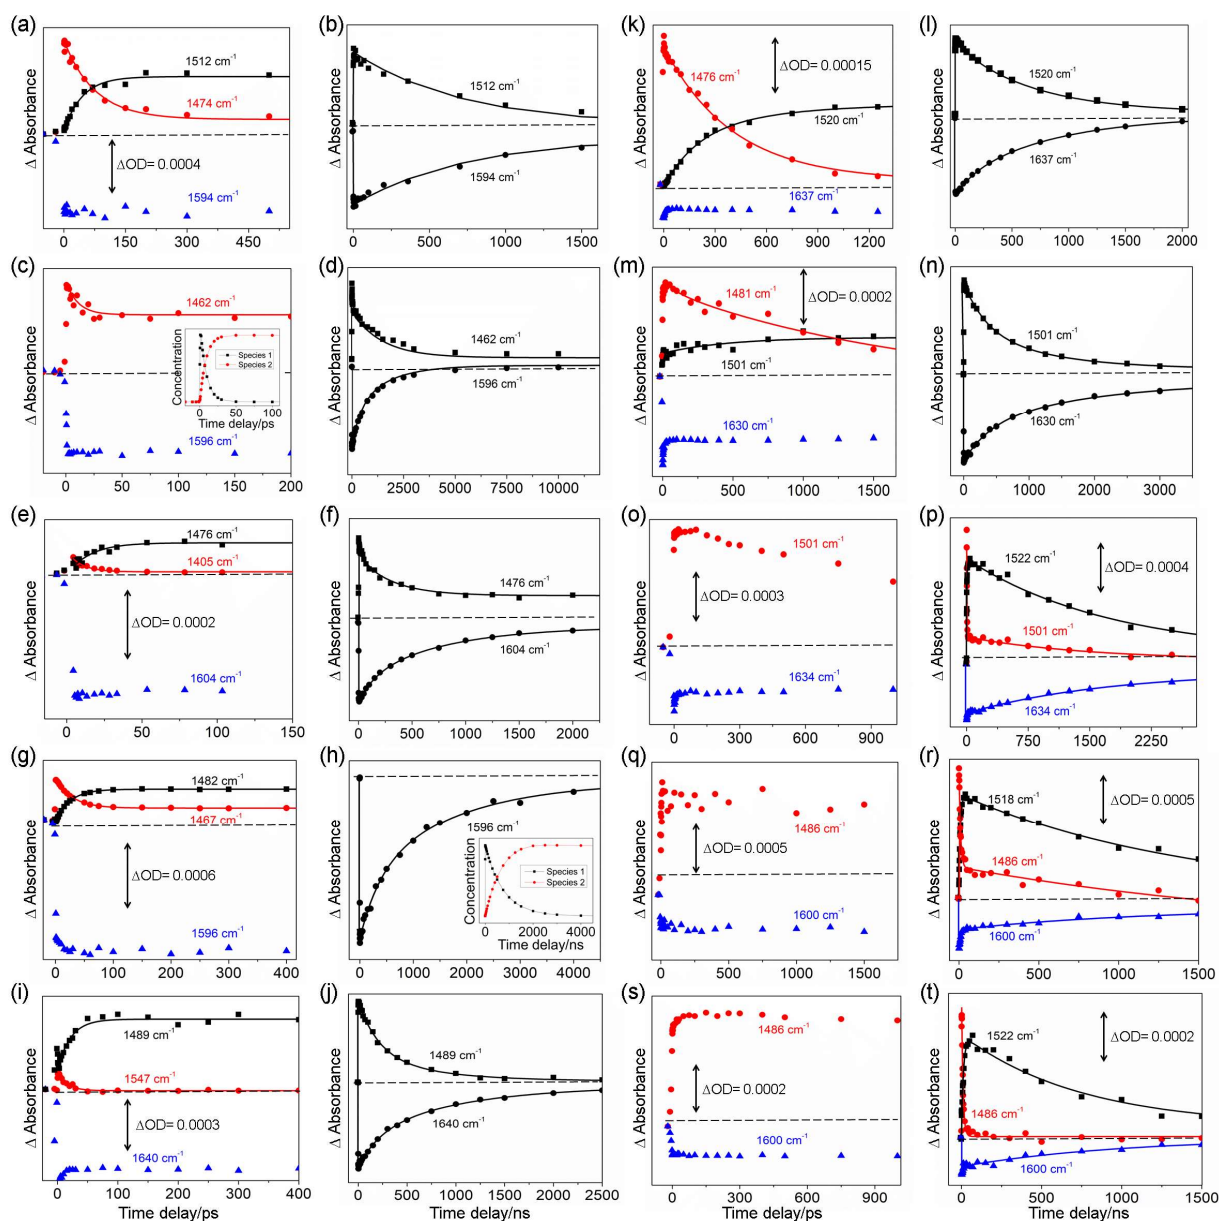

**Figure S8.** Selected TRIR kinetic traces associated with the singlet, triplet excited states and ground state displaying decay of the singlet state, formation and decay of the triplet state, and ground state recovery for the thioxathione derivatives in CD<sub>3</sub>CN. The figures associated with various derivatives of TX {(a) and (b)}; 3,3'-MeOTX {(c) and (d) – please note the insert to (c) which shows the results from global analysis to more clearly show the decay of the singlet and the growth of the triplet}; 3,3'-FTX {(e) and (f)}; 3-MeOTX {(g) and (h) – please note the insert to (h) which shows the results from global analysis to clearly show the recovery of parent}; 3-FTX {(i) and (j)}; 2-FTX {(k) and (l)}; 4-MeOTX {(m) and (n)}; 2-MeOTX {(o) and (p)}; 2-F,2'-MeOTX {(q) and (r)} and 2,2'-MeOTX {(s) and (t)} are shown.

## TD-DFT Calculations of Thioxanthone Derivatives

Calculations were carried out with Gaussian09W on a standard desktop PC (Octo-Core Intel i7-9700, 16 GB RAM)<sup>9</sup>

### Optimised co-ordinates

#### 3,3'-MeOTX

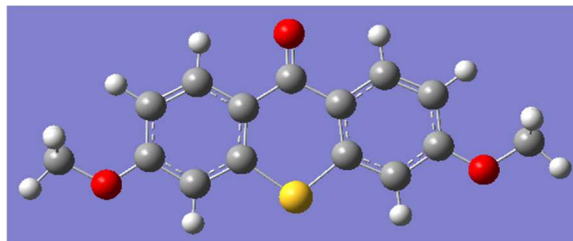

Charge = 0 Multiplicity = 1

| # opt b3lyp/6-31g(d,p) geom=connectivity |          |          |          | # opt b3lyp/6-31g(d,p)<br>scrf=(cpcm,solvent=acetonitrile)<br>geom=connectivity |          |          |          |
|------------------------------------------|----------|----------|----------|---------------------------------------------------------------------------------|----------|----------|----------|
| C                                        | 2.62616  | -1.20095 | -0.00017 | C                                                                               | 2.62328  | -1.20037 | -0.00502 |
| C                                        | 1.39402  | -0.55507 | 0        | C                                                                               | 1.39404  | -0.55274 | -0.01169 |
| C                                        | 1.28285  | 0.84041  | 0.00005  | C                                                                               | 1.28096  | 0.84344  | -0.00732 |
| C                                        | 2.47053  | 1.60535  | 0.00005  | C                                                                               | 2.47416  | 1.60622  | 0.0044   |
| C                                        | 3.72255  | 1.00171  | -0.00003 | C                                                                               | 3.7217   | 1.00077  | 0.01178  |
| C                                        | 3.78835  | -0.40397 | -0.00007 | C                                                                               | 3.79028  | -0.4068  | 0.00703  |
| H                                        | 2.72348  | -2.28645 | -0.00043 | H                                                                               | 2.7164   | -2.2876  | -0.00855 |
| H                                        | 2.38366  | 2.69979  | 0.00015  | H                                                                               | 2.39494  | 2.70044  | 0.00759  |
| H                                        | 4.62038  | 1.61058  | -0.0001  | H                                                                               | 4.62526  | 1.60869  | 0.02098  |
| C                                        | 0        | 1.58152  | 0.00001  | C                                                                               | 0        | 1.57574  | -0.01455 |
| O                                        | 0        | 2.8042   | -0.0001  | O                                                                               | 0        | 2.80559  | -0.02539 |
| C                                        | -1.28284 | 0.84041  | 0.0001   | C                                                                               | -1.28096 | 0.84344  | -0.00723 |
| C                                        | -1.39401 | -0.55506 | 0.00011  | C                                                                               | -1.39404 | -0.55274 | -0.01175 |
| C                                        | -2.47052 | 1.60536  | 0.00015  | C                                                                               | -2.47416 | 1.60621  | 0.00465  |
| C                                        | -2.62617 | -1.20095 | 0.00004  | C                                                                               | -2.62328 | -1.20037 | -0.00519 |
| C                                        | -3.72255 | 1.00172  | 0.00011  | C                                                                               | -3.7217  | 1.00076  | 0.01197  |
| H                                        | -2.38365 | 2.69979  | 0.00022  | H                                                                               | -2.39494 | 2.70044  | 0.00801  |
| C                                        | -3.78835 | -0.40397 | -0.00004 | C                                                                               | -3.79028 | -0.40681 | 0.00702  |
| H                                        | -2.72348 | -2.28644 | 0.00004  | H                                                                               | -2.7164  | -2.2876  | -0.00895 |
| H                                        | -4.62037 | 1.61059  | 0.00022  | H                                                                               | -4.62526 | 1.60869  | 0.02126  |
| S                                        | 0        | -1.61602 | 0.00032  | S                                                                               | 0        | -1.61508 | -0.02879 |
| O                                        | 4.93884  | -1.14594 | 0.00012  | O                                                                               | 4.93565  | -1.14493 | 0.01343  |
| O                                        | -4.93884 | -1.14593 | -0.00039 | O                                                                               | -4.93564 | -1.14493 | 0.01336  |
| C                                        | 6.20772  | -0.44281 | -0.00029 | C                                                                               | 6.21232  | -0.4448  | 0.02703  |
| H                                        | 6.30771  | 0.15996  | 0.90692  | H                                                                               | 6.30693  | 0.15462  | 0.93764  |
| H                                        | 6.92256  | -1.27695 | 0.00003  | H                                                                               | 6.92471  | -1.2814  | 0.03003  |
| H                                        | 6.30746  | 0.15922  | -0.90801 | H                                                                               | 6.32249  | 0.16143  | -0.87729 |
| C                                        | -6.20774 | -0.44282 | -0.00018 | C                                                                               | -6.21231 | -0.44479 | 0.02696  |
| H                                        | -6.30761 | 0.1599   | -0.90743 | H                                                                               | -6.3225  | 0.16135  | -0.87741 |
| H                                        | -6.92257 | -1.27696 | -0.00055 | H                                                                               | -6.9247  | -1.28139 | 0.0301   |
| H                                        | -6.30761 | 0.15926  | 0.90751  | H                                                                               | -6.3069  | 0.1547   | 0.93752  |

### 3,3'-FTX

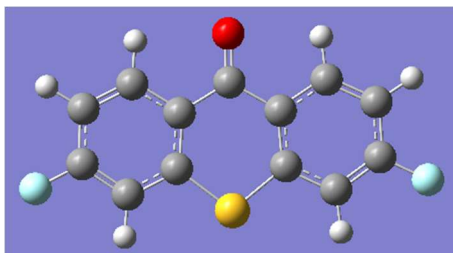

Charge = 0 Multiplicity = 1

| # opt b3lyp/6-31g(d,p) geom=connectivity |          |          |          | # opt b3lyp/6-31g(d,p)<br>scrf=(cpcm,solvent=acetonitrile)<br>geom=connectivity |          |          |          |
|------------------------------------------|----------|----------|----------|---------------------------------------------------------------------------------|----------|----------|----------|
| C                                        | -1.26551 | -0.00002 | -2.63026 | C                                                                               | -0.00061 | -1.26507 | -2.62752 |
| C                                        | -0.61501 | 0.00023  | -1.38956 | C                                                                               | -0.00005 | -0.61344 | -1.38777 |
| C                                        | 0.77732  | 0.00019  | -1.28649 | C                                                                               | 0.00053  | 0.78027  | -1.2855  |
| C                                        | 1.54813  | 0        | -2.47299 | C                                                                               | 0.00052  | 1.54896  | -2.47498 |
| C                                        | 0.94041  | -0.00028 | -3.72298 | C                                                                               | -0.00005 | 0.93951  | -3.7233  |
| C                                        | -0.46211 | -0.00035 | -3.77003 | C                                                                               | -0.0006  | -0.46314 | -3.76787 |
| H                                        | -2.35447 | 0.00006  | -2.70765 | H                                                                               | -0.00104 | -2.35651 | -2.70291 |
| H                                        | 2.64275  | 0.00013  | -2.38499 | H                                                                               | 0.00098  | 2.64344  | -2.39519 |
| H                                        | 1.53502  | -0.00052 | -4.63664 | H                                                                               | -0.00007 | 1.53631  | -4.63782 |
| C                                        | 1.52289  | 0.00026  | 0        | C                                                                               | 0.00118  | 1.51891  | 0        |
| O                                        | 2.74215  | 0.00029  | 0        | O                                                                               | 0.00224  | 2.74415  | 0        |
| C                                        | 0.77732  | 0.00019  | 1.28649  | C                                                                               | 0.00053  | 0.78027  | 1.2855   |
| C                                        | -0.61501 | 0.00023  | 1.38956  | C                                                                               | -0.00005 | -0.61344 | 1.38777  |
| C                                        | 1.54813  | 0        | 2.47299  | C                                                                               | 0.00052  | 1.54896  | 2.47498  |
| C                                        | -1.26551 | -0.00002 | 2.63026  | C                                                                               | -0.00061 | -1.26507 | 2.62752  |
| C                                        | 0.94041  | -0.00028 | 3.72298  | C                                                                               | -0.00005 | 0.93951  | 3.7233   |
| H                                        | 2.64275  | 0.00013  | 2.38499  | H                                                                               | 0.00098  | 2.64344  | 2.39519  |
| C                                        | -0.46211 | -0.00035 | 3.77003  | C                                                                               | -0.0006  | -0.46314 | 3.76787  |
| H                                        | -2.35447 | 0.00006  | 2.70765  | H                                                                               | -0.00104 | -2.35651 | 2.70291  |
| H                                        | 1.53502  | -0.00052 | 4.63664  | H                                                                               | -0.00007 | 1.53631  | 4.63782  |
| S                                        | -1.6754  | 0.0007   | 0        | S                                                                               | -0.00005 | -1.67511 | 0        |
| F                                        | -1.0552  | -0.00064 | -4.96142 | F                                                                               | -0.00115 | -1.05758 | -4.95934 |
| F                                        | -1.0552  | -0.00064 | 4.96142  | F                                                                               | -0.00115 | -1.05758 | 4.95934  |

### 3-MeOTX

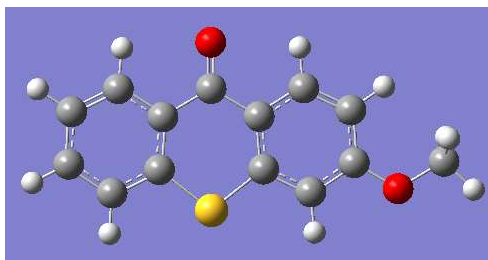

Charge = 0 Multiplicity = 1

| # opt b3lyp/6-31g(d,p) geom=connectivity |          |          |          | # opt b3lyp/6-31g(d,p)<br>scrf=(cpcm,solvent=acetonitrile)<br>geom=connectivity |          |          |          |
|------------------------------------------|----------|----------|----------|---------------------------------------------------------------------------------|----------|----------|----------|
| C                                        | 3.24792  | -1.5541  | -0.00014 | C                                                                               | 3.24499  | -1.55372 | 0.02514  |
| C                                        | 2.05814  | -0.81243 | 0.00008  | C                                                                               | 2.05806  | -0.81065 | -0.0122  |
| C                                        | 2.06601  | 0.582    | 0.00002  | C                                                                               | 2.06497  | 0.58505  | -0.00471 |
| C                                        | 3.31133  | 1.24643  | -0.00026 | C                                                                               | 3.31209  | 1.24684  | 0.04361  |
| C                                        | 4.50088  | 0.52347  | -0.00049 | C                                                                               | 4.49912  | 0.52204  | 0.08203  |
| C                                        | 4.46827  | -0.87943 | -0.00044 | C                                                                               | 4.46598  | -0.88101 | 0.07231  |
| H                                        | 3.22775  | -2.64447 | -0.0001  | H                                                                               | 3.22702  | -2.64668 | 0.01852  |
| H                                        | 3.31948  | 2.34256  | -0.00027 | H                                                                               | 3.32918  | 2.34163  | 0.04977  |
| H                                        | 5.45727  | 1.04449  | -0.00073 | H                                                                               | 5.45822  | 1.04176  | 0.11952  |
| H                                        | 5.40137  | -1.44374 | -0.00063 | H                                                                               | 5.39999  | -1.44787 | 0.10233  |
| C                                        | 0.8388   | 1.42904  | 0.00021  | C                                                                               | 0.83809  | 1.42323  | -0.04614 |
| O                                        | 0.9423   | 2.64574  | 0.00033  | O                                                                               | 0.94303  | 2.64581  | -0.09475 |
| C                                        | -0.49608 | 0.79217  | 0.00022  | C                                                                               | -0.49369 | 0.79517  | -0.02423 |
| C                                        | -0.71805 | -0.5909  | 0.00025  | C                                                                               | -0.71684 | -0.5888  | -0.0329  |
| C                                        | -1.61995 | 1.64938  | 0.00017  | C                                                                               | -1.62312 | 1.65052  | 0.00432  |
| C                                        | -1.99818 | -1.13565 | 0.00013  | C                                                                               | -1.9945  | -1.13542 | -0.0152  |
| C                                        | -2.91551 | 1.14761  | 0.00005  | C                                                                               | -2.91401 | 1.14628  | 0.02423  |
| H                                        | -1.44646 | 2.73346  | 0.00022  | H                                                                               | -1.45745 | 2.735    | 0.01046  |
| C                                        | -3.09324 | -0.24887 | -0.0001  | C                                                                               | -3.0942  | -0.25196 | 0.01417  |
| H                                        | -2.18157 | -2.21006 | 0.00022  | H                                                                               | -2.17371 | -2.21179 | -0.0226  |
| H                                        | -3.76227 | 1.82586  | 0.00009  | H                                                                               | -3.76642 | 1.82359  | 0.04673  |
| S                                        | 0.5868   | -1.75802 | 0.0005   | S                                                                               | 0.58746  | -1.75608 | -0.07694 |
| O                                        | -4.29878 | -0.89621 | -0.00054 | O                                                                               | -4.29463 | -0.89578 | 0.03144  |
| C                                        | -5.50802 | -0.09444 | -0.00037 | C                                                                               | -5.51113 | -0.09611 | 0.06727  |
| H                                        | -5.5598  | 0.514    | -0.90783 | H                                                                               | -5.58576 | 0.52173  | -0.83281 |
| H                                        | -6.28674 | -0.86938 | -0.00053 | H                                                                               | -6.28803 | -0.87308 | 0.07763  |
| H                                        | -5.55979 | 0.51373  | 0.90726  | H                                                                               | -5.5443  | 0.50399  | 0.98176  |

### 3-FTX

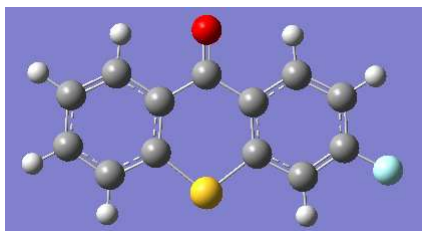

Charge = 0 Multiplicity = 1

| # opt b3lyp/6-31g(d,p) geom=connectivity |          |          |          | # opt b3lyp/6-31g(d,p)<br>scrf=(cpcm,solvent=acetonitrile)<br>geom=connectivity |          |          |          |
|------------------------------------------|----------|----------|----------|---------------------------------------------------------------------------------|----------|----------|----------|
| C                                        | -2.86991 | -1.53686 | -0.00021 | C                                                                               | -2.86544 | -1.53659 | -0.02403 |
| C                                        | -1.67411 | -0.80513 | 0.00014  | C                                                                               | -1.6725  | -0.8033  | 0.01751  |
| C                                        | -1.67041 | 0.58961  | 0.00013  | C                                                                               | -1.66888 | 0.59281  | 0.00869  |
| C                                        | -2.91065 | 1.26464  | -0.00011 | C                                                                               | -2.91098 | 1.26483  | -0.04561 |
| C                                        | -4.10568 | 0.55125  | -0.00055 | C                                                                               | -4.10302 | 0.54922  | -0.08867 |
| C                                        | -4.08461 | -0.852   | -0.00066 | C                                                                               | -4.08074 | -0.85427 | -0.07726 |
| H                                        | -2.85925 | -2.62765 | -0.0001  | H                                                                               | -2.85644 | -2.62987 | -0.01613 |
| H                                        | -2.91039 | 2.36092  | 0.00012  | H                                                                               | -2.91949 | 2.35985  | -0.05244 |
| H                                        | -5.05828 | 1.07997  | -0.00097 | H                                                                               | -5.05817 | 1.07618  | -0.13098 |
| H                                        | -5.02275 | -1.40858 | -0.00105 | H                                                                               | -5.01927 | -1.41379 | -0.11078 |
| C                                        | -0.43878 | 1.42617  | 0.00025  | C                                                                               | -0.43875 | 1.42123  | 0.05625  |
| O                                        | -0.52455 | 2.6425   | 0.0003   | O                                                                               | -0.52457 | 2.64199  | 0.12211  |
| C                                        | 0.89759  | 0.77425  | 0.00025  | C                                                                               | 0.89627  | 0.77738  | 0.01898  |
| C                                        | 1.09923  | -0.60766 | 0.00022  | C                                                                               | 1.09749  | -0.60588 | 0.02967  |
| C                                        | 2.02619  | 1.62759  | 0.00019  | C                                                                               | 2.02721  | 1.62867  | -0.02528 |
| C                                        | 2.38416  | -1.16727 | -0.00009 | C                                                                               | 2.38107  | -1.16681 | 0.00034  |
| C                                        | 3.31644  | 1.11109  | -0.00014 | C                                                                               | 3.31542  | 1.11016  | -0.05696 |
| H                                        | 1.86006  | 2.71291  | 0.00047  | H                                                                               | 1.86937  | 2.71441  | -0.03347 |
| C                                        | 3.46303  | -0.28469 | -0.00038 | C                                                                               | 3.46     | -0.28584 | -0.04238 |
| H                                        | 2.53818  | -2.24783 | -0.00004 | H                                                                               | 2.53377  | -2.24981 | 0.00965  |
| H                                        | 4.18511  | 1.76908  | -0.00031 | H                                                                               | 4.1845   | 1.7701   | -0.09151 |
| S                                        | -0.2112  | -1.76292 | 0.00073  | S                                                                               | -0.21112 | -1.76066 | 0.09169  |
| F                                        | 4.69422  | -0.79091 | -0.00074 | F                                                                               | 4.69081  | -0.79357 | -0.07176 |

TX

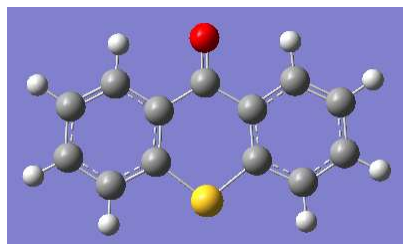

Charge = 0 Multiplicity = 1

| # opt b3lyp/6-31g(d,p) geom=connectivity |          |          |          | # opt b3lyp/6-31g(d,p)<br>scrf=(cpcm,solvent=acetonitrile)<br>geom=connectivity |          |          |          |
|------------------------------------------|----------|----------|----------|---------------------------------------------------------------------------------|----------|----------|----------|
| C                                        | 1.40696  | -0.00037 | 2.63682  | C                                                                               | 1.4066   | -0.04575 | 2.62959  |
| C                                        | 0.76295  | 0.00015  | 1.39092  | C                                                                               | 0.76095  | 0.03354  | 1.38872  |
| C                                        | -0.62817 | 0.00023  | 1.28808  | C                                                                               | -0.63164 | 0.02252  | 1.28548  |
| C                                        | -1.38992 | 0.00003  | 2.47735  | C                                                                               | -1.39091 | -0.07579 | 2.4732   |
| C                                        | -0.76414 | -0.00058 | 3.72009  | C                                                                               | -0.76236 | -0.15809 | 3.71129  |
| C                                        | 0.63742  | -0.00089 | 3.7991   | C                                                                               | 0.63923  | -0.14175 | 3.79008  |
| H                                        | 2.4956   | -0.00032 | 2.70314  | H                                                                               | 2.49737  | -0.03504 | 2.69853  |
| H                                        | -2.48318 | 0.00046  | 2.39839  | H                                                                               | -2.48344 | -0.08476 | 2.40279  |
| H                                        | -1.3591  | -0.00103 | 4.63242  | H                                                                               | -1.35592 | -0.23467 | 4.62405  |
| H                                        | 1.12515  | -0.00145 | 4.77459  | H                                                                               | 1.12987  | -0.20574 | 4.76472  |
| C                                        | -1.3748  | 0.00037  | 0        | C                                                                               | -1.36714 | 0.11568  | 0        |
| O                                        | -2.59423 | 0.00055  | 0        | O                                                                               | -2.58404 | 0.26102  | 0        |
| C                                        | -0.62817 | 0.00023  | -1.28808 | C                                                                               | -0.63164 | 0.02252  | -1.28548 |
| C                                        | 0.76295  | 0.00015  | -1.39092 | C                                                                               | 0.76095  | 0.03354  | -1.38872 |
| C                                        | -1.38992 | 0.00003  | -2.47735 | C                                                                               | -1.39091 | -0.07579 | -2.4732  |
| C                                        | 1.40696  | -0.00037 | -2.63682 | C                                                                               | 1.4066   | -0.04575 | -2.62959 |
| C                                        | -0.76414 | -0.00058 | -3.72009 | C                                                                               | -0.76236 | -0.15809 | -3.71129 |
| H                                        | -2.48318 | 0.00046  | -2.39839 | H                                                                               | -2.48344 | -0.08476 | -2.40279 |
| C                                        | 0.63742  | -0.00089 | -3.7991  | C                                                                               | 0.63923  | -0.14175 | -3.79008 |
| H                                        | 2.4956   | -0.00032 | -2.70314 | H                                                                               | 2.49737  | -0.03504 | -2.69853 |
| H                                        | -1.3591  | -0.00103 | -4.63242 | H                                                                               | -1.35592 | -0.23467 | -4.62405 |
| H                                        | 1.12515  | -0.00145 | -4.77459 | H                                                                               | 1.12987  | -0.20574 | -4.76472 |
| S                                        | 1.82154  | 0.00095  | 0        | S                                                                               | 1.81481  | 0.17012  | 0        |



## ITX

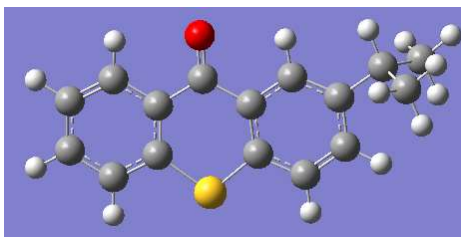

Charge = 0 Multiplicity = 1

| # opt b3lyp/6-31g(d,p) geom=connectivity |          |          |          | # opt b3lyp/6-31g(d,p)<br>scrf=(cpcm,solvent=acetonitrile)<br>geom=connectivity |          |          |          |
|------------------------------------------|----------|----------|----------|---------------------------------------------------------------------------------|----------|----------|----------|
| C                                        | -3.86202 | -1.09679 | -0.00092 | C                                                                               | -3.84902 | -1.09621 | -0.12531 |
| C                                        | -2.5326  | -0.64939 | 0.00003  | C                                                                               | -2.52821 | -0.64821 | 0.00957  |
| C                                        | -2.22007 | 0.71015  | 0.00029  | C                                                                               | -2.21578 | 0.71264  | 0.03803  |
| C                                        | -3.28036 | 1.64321  | -0.00047 | C                                                                               | -3.27133 | 1.64512  | -0.07844 |
| C                                        | -4.60361 | 1.21337  | -0.00142 | C                                                                               | -4.58626 | 1.21357  | -0.21635 |
| C                                        | -4.89413 | -0.16011 | -0.00163 | C                                                                               | -4.87622 | -0.16002 | -0.23825 |
| H                                        | -4.0924  | -2.16274 | -0.00114 | H                                                                               | -4.08201 | -2.16382 | -0.14503 |
| H                                        | -3.03659 | 2.71181  | -0.00026 | H                                                                               | -3.03714 | 2.71427  | -0.05672 |
| H                                        | -5.41494 | 1.93979  | -0.00199 | H                                                                               | -5.39569 | 1.9401   | -0.30683 |
| H                                        | -5.93216 | -0.49441 | -0.00235 | H                                                                               | -5.91091 | -0.49561 | -0.34545 |
| C                                        | -0.83396 | 1.25346  | 0.00144  | C                                                                               | -0.83847 | 1.24228  | 0.19279  |
| O                                        | -0.65069 | 2.45916  | 0.00282  | O                                                                               | -0.66079 | 2.43983  | 0.38222  |
| C                                        | 0.32743  | 0.31998  | 0.00075  | C                                                                               | 0.32557  | 0.32283  | 0.10696  |
| C                                        | 0.21571  | -1.06966 | 0.00052  | C                                                                               | 0.21418  | -1.06767 | 0.08471  |
| C                                        | 1.61587  | 0.89362  | 0.00041  | C                                                                               | 1.61359  | 0.897    | 0.05205  |
| C                                        | 1.35208  | -1.89101 | 0.00001  | C                                                                               | 1.34809  | -1.88822 | 0.01289  |
| C                                        | 2.76016  | 0.09366  | -0.00007 | C                                                                               | 2.75539  | 0.09753  | -0.02251 |
| H                                        | 1.69462  | 1.9871   | 0.00058  | H                                                                               | 1.6995   | 1.98855  | 0.07048  |
| C                                        | 2.61642  | -1.30745 | -0.00027 | C                                                                               | 2.61082  | -1.30429 | -0.04104 |
| H                                        | 1.25493  | -2.97748 | -0.00019 | H                                                                               | 1.25312  | -2.97735 | -0.00295 |
| H                                        | 3.50455  | -1.94049 | -0.00065 | H                                                                               | 3.49901  | -1.93894 | -0.09973 |
| S                                        | -1.31843 | -1.90637 | 0.001    | S                                                                               | -1.31964 | -1.90218 | 0.16437  |
| C                                        | 4.13389  | 0.73704  | -0.0004  | C                                                                               | 4.12897  | 0.73921  | -0.08418 |
| H                                        | 4.00983  | 1.85258  | 0.00059  | H                                                                               | 4.0111   | 1.85389  | -0.0226  |
| C                                        | 4.90791  | 0.35186  | 1.26616  | C                                                                               | 4.9852   | 0.29286  | 1.10624  |
| H                                        | 5.86527  | 0.88214  | 1.31935  | H                                                                               | 5.94784  | 0.81769  | 1.11809  |
| H                                        | 4.33999  | 0.6033   | 2.16976  | H                                                                               | 4.48712  | 0.50128  | 2.06004  |
| H                                        | 5.12718  | -0.72033 | 1.30552  | H                                                                               | 5.20478  | -0.78064 | 1.07933  |
| C                                        | 4.90628  | 0.35387  | -1.26855 | C                                                                               | 4.80897  | 0.41248  | -1.41863 |
| H                                        | 4.33779  | 0.60804  | -2.17103 | H                                                                               | 4.19339  | 0.72527  | -2.26987 |
| H                                        | 5.86423  | 0.88312  | -1.32142 | H                                                                               | 5.7736   | 0.9264   | -1.50582 |
| H                                        | 5.12424  | -0.71849 | -1.31061 | H                                                                               | 5.00388  | -0.66009 | -1.53178 |

## 2-FTX

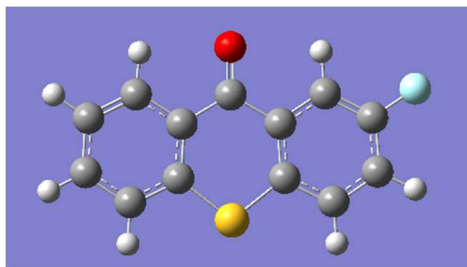

Charge = 0 Multiplicity = 1

| # opt b3lyp/6-31g(d,p) geom=connectivity |          |          |          | # opt b3lyp/6-31g(d,p)<br>scrf=(cpcm,solvent=acetonitrile)<br>geom=connectivity |          |          |          |
|------------------------------------------|----------|----------|----------|---------------------------------------------------------------------------------|----------|----------|----------|
| C                                        | -3.08091 | -1.24277 | -0.00041 | C                                                                               | -3.06901 | -1.24197 | -0.08992 |
| C                                        | -1.7846  | -0.70758 | -0.00006 | C                                                                               | -1.78015 | -0.70545 | 0.02753  |
| C                                        | -1.56353 | 0.66987  | 0.00018  | C                                                                               | -1.55921 | 0.67385  | 0.03305  |
| C                                        | -2.68384 | 1.53054  | 0.00038  | C                                                                               | -2.67528 | 1.53284  | -0.08703 |
| C                                        | -3.97517 | 1.01293  | 0.00011  | C                                                                               | -3.95936 | 1.0124   | -0.20742 |
| C                                        | -4.1733  | -0.37686 | -0.00032 | C                                                                               | -4.1571  | -0.37762 | -0.20767 |
| H                                        | -3.24037 | -2.32191 | -0.00076 | H                                                                               | -3.23094 | -2.32309 | -0.09247 |
| H                                        | -2.51239 | 2.6133   | 0.00076  | H                                                                               | -2.51271 | 2.6155   | -0.08222 |
| H                                        | -4.83368 | 1.68364  | 0.00033  | H                                                                               | -4.8164  | 1.68199  | -0.30094 |
| H                                        | -5.18705 | -0.77983 | -0.00075 | H                                                                               | -5.16794 | -0.7831  | -0.30179 |
| C                                        | -0.21906 | 1.30439  | -0.0001  | C                                                                               | -0.22099 | 1.29491  | 0.16717  |
| O                                        | -0.10883 | 2.51738  | -0.00052 | O                                                                               | -0.11086 | 2.49963  | 0.35134  |
| C                                        | 1.00592  | 0.4461   | 0.0001   | C                                                                               | 1.0032   | 0.44832  | 0.06471  |
| C                                        | 0.98425  | -0.94877 | -0.00004 | C                                                                               | 0.98112  | -0.94695 | 0.06601  |
| C                                        | 2.24925  | 1.11072  | 0.00017  | C                                                                               | 2.24426  | 1.11272  | -0.03002 |
| C                                        | 2.16926  | -1.7056  | -0.00036 | C                                                                               | 2.16281  | -1.70509 | -0.01961 |
| C                                        | 3.41112  | 0.34554  | -0.00002 | C                                                                               | 3.40036  | 0.34546  | -0.11682 |
| H                                        | 2.27317  | 2.20757  | 0.00038  | H                                                                               | 2.27354  | 2.20738  | -0.03058 |
| C                                        | 3.40132  | -1.0592  | -0.00036 | C                                                                               | 3.39112  | -1.05992 | -0.11246 |
| H                                        | 2.13159  | -2.79755 | -0.00065 | H                                                                               | 2.12674  | -2.79999 | -0.01592 |
| H                                        | 4.3327   | -1.62712 | -0.0007  | H                                                                               | 4.3198   | -1.63261 | -0.18156 |
| S                                        | -0.49077 | -1.88201 | 0.00052  | S                                                                               | -0.49179 | -1.87473 | 0.19617  |
| F                                        | 4.59052  | 0.9688   | 0.0002   | F                                                                               | 4.57699  | 0.97018  | -0.20767 |

# 4-MeOTX

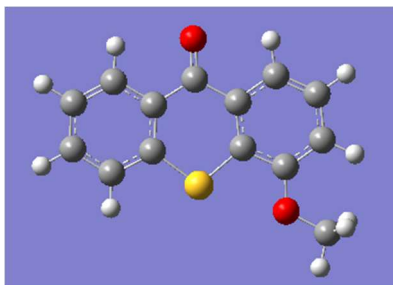

Charge = 0 Multiplicity = 1

| # opt b3lyp/6-31g(d,p) geom=connectivity |          |          |          | # opt b3lyp/6-31g(d,p)<br>scrf=(cpcm,solvent=acetonitrile)<br>geom=connectivity |          |          |          |
|------------------------------------------|----------|----------|----------|---------------------------------------------------------------------------------|----------|----------|----------|
| C                                        | -2.60603 | -1.85527 | 0.00018  | C                                                                               | -2.57423 | -1.86103 | -0.07486 |
| C                                        | -1.60776 | -0.86795 | -0.00003 | C                                                                               | -1.59993 | -0.86837 | 0.08282  |
| C                                        | -1.92972 | 0.49051  | -0.00004 | C                                                                               | -1.9252  | 0.49054  | 0.03345  |
| C                                        | -3.29452 | 0.85874  | 0.00007  | C                                                                               | -3.27223 | 0.85165  | -0.18823 |
| C                                        | -4.29152 | -0.11016 | 0.0002   | C                                                                               | -4.24862 | -0.1262  | -0.35237 |
| C                                        | -3.94477 | -1.47141 | 0.00029  | C                                                                               | -3.8998  | -1.48434 | -0.29345 |
| H                                        | -2.34187 | -2.91343 | 0.00028  | H                                                                               | -2.31035 | -2.92077 | -0.03224 |
| H                                        | -3.54782 | 1.925    | 0.00005  | H                                                                               | -3.53705 | 1.91297  | -0.22716 |
| H                                        | -5.34022 | 0.18248  | 0.00023  | H                                                                               | -5.28753 | 0.16009  | -0.52565 |
| H                                        | -4.72876 | -2.22942 | 0.00046  | H                                                                               | -4.66961 | -2.24969 | -0.42163 |
| C                                        | -0.93247 | 1.5929   | -0.00013 | C                                                                               | -0.93536 | 1.5808   | 0.2141   |
| O                                        | -1.29479 | 2.75645  | -0.00021 | O                                                                               | -1.29926 | 2.71921  | 0.47094  |
| C                                        | 0.52766  | 1.26635  | -0.00007 | C                                                                               | 0.5186   | 1.27555  | 0.06017  |
| C                                        | 1.00919  | -0.03601 | -0.00012 | C                                                                               | 1.00701  | -0.02706 | 0.11686  |
| C                                        | 1.44515  | 2.33899  | 0.00007  | C                                                                               | 1.41659  | 2.33818  | -0.14709 |
| C                                        | 2.40661  | -0.27098 | 0        | C                                                                               | 2.39059  | -0.26996 | -0.03354 |
| C                                        | 2.81541  | 2.09764  | 0.0002   | C                                                                               | 2.78247  | 2.08898  | -0.29642 |
| H                                        | 1.05408  | 3.36104  | 0.00008  | H                                                                               | 1.03481  | 3.36092  | -0.18881 |
| C                                        | 3.31614  | 0.78584  | 0.00021  | C                                                                               | 3.28576  | 0.78451  | -0.2419  |
| H                                        | 3.5152   | 2.93417  | 0.00028  | H                                                                               | 3.47141  | 2.92258  | -0.45741 |
| H                                        | 4.38801  | 0.61371  | 0.00043  | H                                                                               | 4.35402  | 0.60526  | -0.36206 |
| S                                        | 0.03342  | -1.47152 | -0.00039 | S                                                                               | 0.0296   | -1.43686 | 0.39568  |
| O                                        | 2.69715  | -1.61553 | -0.00016 | O                                                                               | 2.69578  | -1.60522 | 0.05453  |
| C                                        | 4.09499  | -1.99939 | 0.00025  | C                                                                               | 4.07968  | -1.99726 | -0.16293 |
| H                                        | 4.02185  | -3.09565 | -0.00003 | H                                                                               | 4.02166  | -3.08965 | -0.06086 |
| H                                        | 4.58823  | -1.63963 | -0.90703 | H                                                                               | 4.40306  | -1.71393 | -1.16907 |
| H                                        | 4.58757  | -1.64002 | 0.90804  | H                                                                               | 4.72194  | -1.56581 | 0.6106   |

## 2-MeOTX

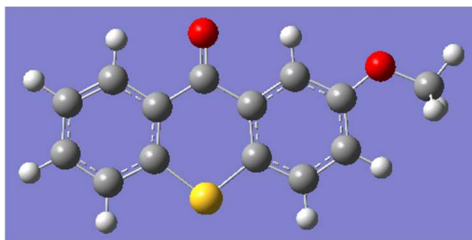

Charge = 0 Multiplicity = 1

| # opt b3lyp/6-31g(d,p) geom=connectivity |          |          |          | # opt b3lyp/6-31g(d,p)<br>scrf=(cpcm,solvent=acetonitrile)<br>geom=connectivity |          |          |          |
|------------------------------------------|----------|----------|----------|---------------------------------------------------------------------------------|----------|----------|----------|
| C                                        | -3.50144 | -1.18383 | -0.00018 | C                                                                               | -3.45545 | -1.17913 | -0.24409 |
| C                                        | -2.19039 | -0.68401 | 0.00001  | C                                                                               | -2.17633 | -0.68085 | 0.0274   |
| C                                        | -1.93311 | 0.68723  | 0.00007  | C                                                                               | -1.91848 | 0.69274  | 0.05914  |
| C                                        | -3.03054 | 1.5772   | -0.00005 | C                                                                               | -2.98146 | 1.58504  | -0.19642 |
| C                                        | -4.33516 | 1.0948   | -0.00028 | C                                                                               | -4.25694 | 1.10086  | -0.47359 |
| C                                        | -4.57008 | -0.28953 | -0.00035 | C                                                                               | -4.49473 | -0.28182 | -0.49522 |
| H                                        | -3.68865 | -2.25826 | -0.0002  | H                                                                               | -3.64811 | -2.2545  | -0.26524 |
| H                                        | -2.83012 | 2.65478  | 0.00006  | H                                                                               | -2.7899  | 2.66205  | -0.17133 |
| H                                        | -5.17514 | 1.78787  | -0.0004  | H                                                                               | -5.07508 | 1.79541  | -0.67262 |
| H                                        | -5.59398 | -0.66512 | -0.00055 | H                                                                               | -5.49806 | -0.6576  | -0.71179 |
| C                                        | -0.57273 | 1.28704  | 0.00023  | C                                                                               | -0.58397 | 1.26067  | 0.36613  |
| O                                        | -0.43445 | 2.49723  | 0.00047  | O                                                                               | -0.46493 | 2.41909  | 0.73578  |
| C                                        | 0.63328  | 0.39803  | 0.00008  | C                                                                               | 0.62604  | 0.39789  | 0.19653  |
| C                                        | 0.571    | -1.00042 | 0.00014  | C                                                                               | 0.56207  | -0.99959 | 0.18341  |
| C                                        | 1.88423  | 1.02421  | -0.00005 | C                                                                               | 1.86542  | 1.03002  | 0.05057  |
| C                                        | 1.73405  | -1.78002 | 0.00008  | C                                                                               | 1.71676  | -1.77888 | 0.03362  |
| C                                        | 3.04999  | 0.23546  | -0.00012 | C                                                                               | 3.02163  | 0.24216  | -0.10465 |
| H                                        | 1.9586   | 2.11728  | -0.00009 | H                                                                               | 1.94201  | 2.11937  | 0.06004  |
| C                                        | 2.98724  | -1.1672  | -0.00011 | C                                                                               | 2.95762  | -1.16229 | -0.11126 |
| H                                        | 1.67292  | -2.87084 | 0.00022  | H                                                                               | 1.65694  | -2.87228 | 0.02629  |
| H                                        | 3.88781  | -1.77444 | -0.00025 | H                                                                               | 3.85584  | -1.76898 | -0.22951 |
| S                                        | -0.9292  | -1.89228 | 0.00025  | S                                                                               | -0.94074 | -1.86877 | 0.38675  |
| O                                        | 4.20166  | 0.98774  | -0.00022 | O                                                                               | 4.16404  | 0.99116  | -0.23989 |
| C                                        | 5.46883  | 0.28653  | -0.00019 | C                                                                               | 5.42337  | 0.28963  | -0.42325 |
| H                                        | 5.57235  | -0.31474 | -0.90772 | H                                                                               | 5.40349  | -0.29435 | -1.34844 |
| H                                        | 6.18253  | 1.12212  | -0.00017 | H                                                                               | 6.1343   | 1.1236   | -0.50136 |
| H                                        | 5.57231  | -0.3147  | 0.90739  | H                                                                               | 5.64427  | -0.33302 | 0.44886  |

## 2-F,2'-MeOTX

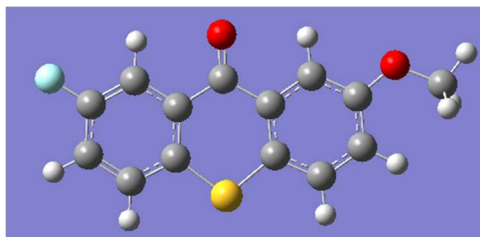

Charge = 0 Multiplicity = 1

| # opt b3lyp/6-31g(d,p) geom=connectivity |          |          |          | # opt b3lyp/6-31g(d,p)<br>scrf=(cpcm,solvent=acetonitrile)<br>geom=connectivity |          |          |          |
|------------------------------------------|----------|----------|----------|---------------------------------------------------------------------------------|----------|----------|----------|
| C                                        | 3.07115  | 1.524    | -0.09087 | C                                                                               | 3.04169  | 1.51588  | -0.1918  |
| C                                        | 1.80549  | 0.92801  | 0.04938  | C                                                                               | 1.79663  | 0.92938  | 0.08902  |
| C                                        | 1.64984  | -0.45835 | 0.08347  | C                                                                               | 1.64127  | -0.45671 | 0.1657   |
| C                                        | 2.79029  | -1.27946 | -0.02751 | C                                                                               | 2.75755  | -1.28847 | -0.0508  |
| C                                        | 4.03352  | -0.67114 | -0.16898 | C                                                                               | 3.9802   | -0.68679 | -0.3335  |
| C                                        | 4.20333  | 0.72289  | -0.20218 | C                                                                               | 4.15238  | 0.70524  | -0.40755 |
| H                                        | 3.17288  | 2.61146  | -0.11585 | H                                                                               | 3.14749  | 2.60445  | -0.24679 |
| H                                        | 2.67577  | -2.36943 | 0.00659  | H                                                                               | 2.64779  | -2.37558 | 0.0105   |
| H                                        | 5.19426  | 1.16503  | -0.3131  | H                                                                               | 5.12861  | 1.14368  | -0.63103 |
| C                                        | 0.33341  | -1.14607 | 0.24519  | C                                                                               | 0.33967  | -1.10807 | 0.48679  |
| O                                        | 0.28972  | -2.34254 | 0.45711  | O                                                                               | 0.30526  | -2.2469  | 0.92216  |
| C                                        | -0.92881 | -0.35156 | 0.12152  | C                                                                               | -0.92107 | -0.34487 | 0.24461  |
| C                                        | -0.96363 | 1.04778  | 0.08877  | C                                                                               | -0.95422 | 1.05222  | 0.17433  |
| C                                        | -2.1276  | -1.06703 | 0.04126  | C                                                                               | -2.10712 | -1.0704  | 0.09018  |
| C                                        | -2.17438 | 1.74152  | -0.02182 | C                                                                               | -2.15563 | 1.73971  | -0.043   |
| C                                        | -3.3423  | -0.36358 | -0.07142 | C                                                                               | -3.31037 | -0.37395 | -0.13182 |
| H                                        | -2.1271  | -2.16186 | 0.07242  | H                                                                               | -2.10762 | -2.16119 | 0.1437   |
| C                                        | -3.37754 | 1.03975  | -0.10244 | C                                                                               | -3.34453 | 1.03022  | -0.19724 |
| H                                        | -2.18992 | 2.83374  | -0.04819 | H                                                                               | -2.17249 | 2.83344  | -0.09637 |
| H                                        | -4.31576 | 1.58065  | -0.18861 | H                                                                               | -4.279   | 1.5658   | -0.36822 |
| S                                        | 0.46843  | 2.03933  | 0.20395  | S                                                                               | 0.47523  | 2.03342  | 0.39294  |
| F                                        | 5.11687  | -1.4423  | -0.27704 | F                                                                               | 5.04258  | -1.46814 | -0.54258 |
| O                                        | -4.43388 | -1.19619 | -0.14374 | O                                                                               | -4.39219 | -1.20745 | -0.267   |
| C                                        | -5.74428 | -0.58858 | -0.25334 | C                                                                               | -5.69156 | -0.60639 | -0.51701 |
| H                                        | -5.82137 | -0.01218 | -1.17942 | H                                                                               | -5.68397 | -0.06298 | -1.46678 |
| H                                        | -6.39456 | -1.47394 | -0.28738 | H                                                                               | -6.33897 | -1.49206 | -0.57712 |
| H                                        | -5.9586  | 0.01867  | 0.63053  | H                                                                               | -5.98276 | 0.03578  | 0.31957  |

## 2,2'-MeOTX

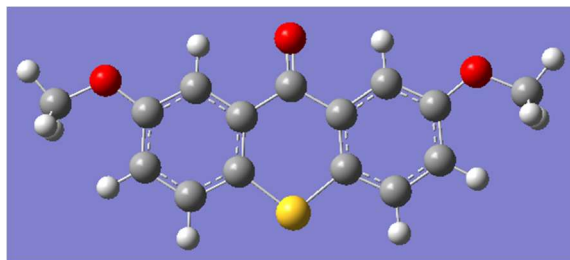

Charge = 0 Multiplicity = 1

| # opt b3lyp/6-31g(d,p) geom=connectivity |          |          |          | # opt b3lyp/6-31g(d,p)<br>scrf=(cpcm,solvent=acetonitrile)<br>geom=connectivity |          |          |          |
|------------------------------------------|----------|----------|----------|---------------------------------------------------------------------------------|----------|----------|----------|
| C                                        | -2.60279 | 1.6956   | 0.1087   | C                                                                               | 1.6896   | -0.1593  | 2.58229  |
| C                                        | -1.37967 | 1.06855  | -0.14868 | C                                                                               | 1.07892  | 0.18936  | 1.37233  |
| C                                        | -1.28633 | -0.32548 | -0.25178 | C                                                                               | -0.30958 | 0.34479  | 1.27956  |
| C                                        | -2.43522 | -1.10423 | -0.09299 | C                                                                               | -1.10484 | 0.14191  | 2.41043  |
| C                                        | -3.66339 | -0.46574 | 0.16932  | C                                                                               | -0.4838  | -0.21425 | 3.62393  |
| C                                        | -3.75976 | 0.93066  | 0.26958  | C                                                                               | 0.91013  | -0.36353 | 3.7202   |
| H                                        | -2.66408 | 2.78318  | 0.18941  | H                                                                               | 2.77595  | -0.27772 | 2.64689  |
| H                                        | -2.39049 | -2.19378 | -0.18177 | H                                                                               | -2.18917 | 0.25873  | 2.36493  |
| H                                        | -4.70839 | 1.41987  | 0.4702   | H                                                                               | 1.38576  | -0.63771 | 4.66227  |
| C                                        | -0.00002 | -1.03663 | -0.53895 | C                                                                               | -0.97786 | 0.73148  | 0        |
| O                                        | 0        | -2.17301 | -0.96643 | O                                                                               | -2.04035 | 1.32729  | 0        |
| C                                        | 1.28631  | -0.32548 | -0.2518  | C                                                                               | -0.30958 | 0.34479  | -1.27956 |
| C                                        | 1.37973  | 1.06858  | -0.14919 | C                                                                               | 1.07892  | 0.18936  | -1.37233 |
| C                                        | 2.43515  | -1.10426 | -0.09277 | C                                                                               | -1.10484 | 0.14191  | -2.41043 |
| C                                        | 2.60297  | 1.69567  | 0.10754  | C                                                                               | 1.6896   | -0.1593  | -2.58229 |
| C                                        | 3.66339  | -0.46574 | 0.16917  | C                                                                               | -0.4838  | -0.21425 | -3.62393 |
| H                                        | 2.39034  | -2.19383 | -0.18108 | H                                                                               | -2.18917 | 0.25873  | -2.36493 |
| C                                        | 3.75992  | 0.93072  | 0.26857  | C                                                                               | 0.91013  | -0.36353 | -3.7202  |
| H                                        | 2.66438  | 2.78328  | 0.18766  | H                                                                               | 2.77595  | -0.27772 | -2.64689 |
| H                                        | 4.70866  | 1.41997  | 0.46857  | H                                                                               | 1.38576  | -0.63771 | -4.66227 |
| S                                        | -0.00002 | 2.11726  | -0.37774 | S                                                                               | 2.12649  | 0.47819  | 0        |
| O                                        | -4.70436 | -1.35473 | 0.30762  | O                                                                               | -1.3799  | -0.3848  | 4.64982  |
| O                                        | 4.70424  | -1.35479 | 0.30811  | O                                                                               | -1.3799  | -0.3848  | -4.64982 |
| C                                        | -6.02452 | -0.81706 | 0.56332  | C                                                                               | -0.86366 | -0.77361 | 5.95137  |
| H                                        | -6.34731 | -0.18572 | -0.26928 | H                                                                               | -1.78463 | -0.83412 | 6.54753  |
| H                                        | -6.62872 | -1.73322 | 0.61737  | H                                                                               | -0.37277 | -1.74972 | 5.89116  |
| H                                        | -6.04027 | -0.28217 | 1.51695  | H                                                                               | -0.19347 | -0.00235 | 6.34247  |
| C                                        | 6.02441  | -0.81719 | 0.56398  | C                                                                               | -0.86366 | -0.77361 | -5.95137 |
| H                                        | 6.03988  | -0.2817  | 1.51732  | H                                                                               | -0.37277 | -1.74972 | -5.89116 |
| H                                        | 6.62843  | -1.73342 | 0.61884  | H                                                                               | -1.78463 | -0.83412 | -6.54753 |
| H                                        | 6.34764  | -0.18643 | -0.26886 | H                                                                               | -0.19347 | -0.00235 | -6.34247 |

## Excited State Energies

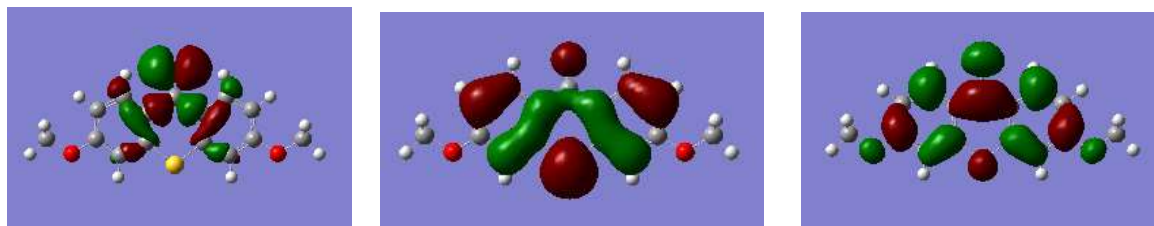

n-orbital

HOMO ( $\pi$ -orbital)

LUMO ( $\pi^*$ -orbital)

**Figure S9:** Representative MOs for the lowest energy transitions of interest, 3,3'-MeOTX shown

| Thioxanthone                                  |                 | Gaseous        |                |                |                | CPCM           |                |                |                |
|-----------------------------------------------|-----------------|----------------|----------------|----------------|----------------|----------------|----------------|----------------|----------------|
| 3,3'-MeOTX                                    |                 | S <sub>1</sub> | S <sub>2</sub> | T <sub>1</sub> | T <sub>2</sub> | S <sub>1</sub> | S <sub>2</sub> | T <sub>1</sub> | T <sub>2</sub> |
| <br>3,6-dimethoxythioxanthone<br>(3,3'-MeOTX) | Energy (kJ/mol) | 355            | 363            | 292            | 313            | 356            | 364            | 291            | 308            |
|                                               | Character       | $n\pi^*$       | $\pi\pi^*$     | $\pi\pi^*$     | $n\pi^*$       | $\pi\pi^*$     | $n\pi^*$       | $\pi\pi^*$     | $\pi\pi^*$     |
|                                               | $\Delta n-p$    | -8 kJ/mol      |                | 21 kJ/mol      |                | 8 kJ/mol       |                | 33 kJ/mol      |                |

**Table S3**

| Thioxanthone                               |                 | Gaseous        |                |                |                | CPCM           |                |                |                |
|--------------------------------------------|-----------------|----------------|----------------|----------------|----------------|----------------|----------------|----------------|----------------|
| 3,3'-FTX                                   |                 | S <sub>1</sub> | S <sub>2</sub> | T <sub>1</sub> | T <sub>2</sub> | S <sub>1</sub> | S <sub>2</sub> | T <sub>1</sub> | T <sub>2</sub> |
| <br>3,6-difluorothioxanthone<br>(3,3'-FTX) | Energy (kJ/mol) | 353            | 365            | 290            | 310            | 355            | 360            | 286            | 319            |
|                                            | Character       | $n\pi^*$       | $\pi\pi^*$     | $\pi\pi^*$     | $n\pi^*$       | $\pi\pi^*$     | $n\pi^*$       | $\pi\pi^*$     | $n\pi^*$       |
|                                            | $\Delta n-p$    | -12 kJ/mol     |                | 21 kJ/mol      |                | 5 kJ/mol       |                | 33 kJ/mol      |                |

**Table S4**

| Thioxanthone                           |                 | Gaseous        |                |                |                | CPCM           |                |                |                |
|----------------------------------------|-----------------|----------------|----------------|----------------|----------------|----------------|----------------|----------------|----------------|
| 3-MeOTX                                |                 | S <sub>1</sub> | S <sub>2</sub> | T <sub>1</sub> | T <sub>2</sub> | S <sub>1</sub> | S <sub>2</sub> | T <sub>1</sub> | T <sub>2</sub> |
| <br>3-methoxythioxanthone<br>(3-MeOTX) | Energy (kJ/mol) | 349            | 354            | 284            | 307            | 346            | 358            | 280            | 306            |
|                                        | Character       | $n\pi^*$       | $\pi\pi^*$     | $\pi\pi^*$     | $n\pi^*$       | $\pi\pi^*$     | $n\pi^*$       | $\pi\pi^*$     | $\pi\pi^*$     |
|                                        | $\Delta n-p$    | -5 kJ/mol      |                | 23 kJ/mol      |                | 12 kJ/mol      |                | 38 kJ/mol      |                |

**Table S5**

| Thioxanthone                        |                 | Gaseous        |                |                |                | CPCM           |                |                |                |
|-------------------------------------|-----------------|----------------|----------------|----------------|----------------|----------------|----------------|----------------|----------------|
| 3-FTX                               |                 | S <sub>1</sub> | S <sub>2</sub> | T <sub>1</sub> | T <sub>2</sub> | S <sub>1</sub> | S <sub>2</sub> | T <sub>1</sub> | T <sub>2</sub> |
| <br>3-fluorothioxanthone<br>(3-FTX) | Energy (kJ/mol) | 349            | 356            | 282            | 306            | 346            | 357            | 278            | 316            |
|                                     | Character       | $n\pi^*$       | $\pi\pi^*$     | $\pi\pi^*$     | $n\pi^*$       | $\pi\pi^*$     | $n\pi^*$       | $\pi\pi^*$     | $n\pi^*$       |
|                                     | $\Delta n-p$    | -7 kJ/mol      |                | 23 kJ/mol      |                | 11 kJ/mol      |                | 38 kJ/mol      |                |

**Table S6**

| Thioxanthone                                                                                           |                 | Gaseous        |                |                |                | CPCM           |                |                |                |
|--------------------------------------------------------------------------------------------------------|-----------------|----------------|----------------|----------------|----------------|----------------|----------------|----------------|----------------|
| TX                                                                                                     |                 | S <sub>1</sub> | S <sub>2</sub> | T <sub>1</sub> | T <sub>2</sub> | S <sub>1</sub> | S <sub>2</sub> | T <sub>1</sub> | T <sub>2</sub> |
| 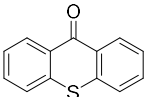<br>Thioxanthone (TX) | Energy (kJ/mol) | 345            | 347            | 274            | 302            | 338            | 353            | 269            | 312            |
|                                                                                                        | Character       | $\pi\pi^*$     |
|                                                                                                        | $\Delta$ n-p    | -2 kJ/mol      |                | 28 kJ/mol      |                | 15 kJ/mol      |                | 43 kJ/mol      |                |

Table S7

| Thioxanthone                                                                                                     |                 | Gaseous        |                |                |                | CPCM           |                |                |                |
|------------------------------------------------------------------------------------------------------------------|-----------------|----------------|----------------|----------------|----------------|----------------|----------------|----------------|----------------|
| ITX                                                                                                              |                 | S <sub>1</sub> | S <sub>2</sub> | T <sub>1</sub> | T <sub>2</sub> | S <sub>1</sub> | S <sub>2</sub> | T <sub>1</sub> | T <sub>2</sub> |
| 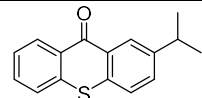<br>Isopropylthioxanthone (ITX) | Energy (kJ/mol) | 343            | 345            | 270            | 302            | 333            | 353            | 264            | 312            |
|                                                                                                                  | Character       | $\pi\pi^*$     |
|                                                                                                                  | $\Delta$ n-p    | 2 kJ/mol       |                | 32 kJ/mol      |                | 20 kJ/mol      |                | 48 kJ/mol      |                |

Table S8

| Thioxanthone                                                                                                      |                 | Gaseous        |                |                |                | CPCM           |                |                |                |
|-------------------------------------------------------------------------------------------------------------------|-----------------|----------------|----------------|----------------|----------------|----------------|----------------|----------------|----------------|
| 2-FTX                                                                                                             |                 | S <sub>1</sub> | S <sub>2</sub> | T <sub>1</sub> | T <sub>2</sub> | S <sub>1</sub> | S <sub>2</sub> | T <sub>1</sub> | T <sub>2</sub> |
| 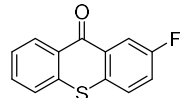<br>2-fluorothioxanthone (2-FTX) | Energy (kJ/mol) | 337            | 344            | 263            | 301            | 329            | 353            | 258            | 311            |
|                                                                                                                   | Character       | $\pi\pi^*$     |
|                                                                                                                   | $\Delta$ n-p    | 7 kJ/mol       |                | 38 kJ/mol      |                | 24 kJ/mol      |                | 53 kJ/mol      |                |

Table S9

| Thioxanthone                                                                                                           |                 | Gaseous        |                |                |                | CPCM           |                |                |                |
|------------------------------------------------------------------------------------------------------------------------|-----------------|----------------|----------------|----------------|----------------|----------------|----------------|----------------|----------------|
| 4-MeOTX                                                                                                                |                 | S <sub>1</sub> | S <sub>2</sub> | T <sub>1</sub> | T <sub>2</sub> | S <sub>1</sub> | S <sub>2</sub> | T <sub>1</sub> | T <sub>2</sub> |
| 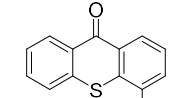<br>4-methoxythioxanthone (4-MeOTX) | Energy (kJ/mol) | 336            | 346            | 267            | 302            | 325            | 354            | 261            | 303            |
|                                                                                                                        | Character       | $\pi\pi^*$     |
|                                                                                                                        | $\Delta$ n-p    | 10 kJ/mol      |                | 35 kJ/mol      |                | 29 kJ/mol      |                | 52 kJ/mol      |                |

Table S10

| Thioxanthone                                                                                                           |                 | Gaseous        |                |                |                | CPCM           |                |                |                |
|------------------------------------------------------------------------------------------------------------------------|-----------------|----------------|----------------|----------------|----------------|----------------|----------------|----------------|----------------|
| 2-MeOTX                                                                                                                |                 | S <sub>1</sub> | S <sub>2</sub> | T <sub>1</sub> | T <sub>2</sub> | S <sub>1</sub> | S <sub>2</sub> | T <sub>1</sub> | T <sub>2</sub> |
| 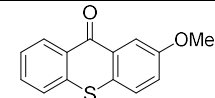<br>2-methoxythioxanthone (2-MeOTX) | Energy (kJ/mol) | 320            | 343            | 252            | 300            | 310            | 353            | 243            | 312            |
|                                                                                                                        | Character       | $\pi\pi^*$     |
|                                                                                                                        | $\Delta$ n-p    | 23 kJ/mol      |                | 48 kJ/mol      |                | 43 kJ/mol      |                | 69 kJ/mol      |                |

Table S11



| Thioxanthone                                         |                 | Gaseous        |                |                |                | CPCM           |                |                |                |
|------------------------------------------------------|-----------------|----------------|----------------|----------------|----------------|----------------|----------------|----------------|----------------|
| 2-MeO,2'-FTX                                         |                 | S <sub>1</sub> | S <sub>2</sub> | T <sub>1</sub> | T <sub>2</sub> | S <sub>1</sub> | S <sub>2</sub> | T <sub>1</sub> | T <sub>2</sub> |
| <br>2-methoxy,7-fluorothioxanthone<br>(2-MeO,2'-FTX) | Energy (kJ/mol) | 311            | 342            | 242            | 299            | 301            | 352            | 234            | 311            |
|                                                      | Character       | $\pi\pi^*$     | $n\pi^*$       | $\pi\pi^*$     | $n\pi^*$       | $\pi\pi^*$     | $n\pi^*$       | $\pi\pi^*$     | $n\pi^*$       |
|                                                      | $\Delta n-p$    | 31 kJ/mol      |                | 57 kJ/mol      |                | 51 kJ/mol      |                | 77 kJ/mol      |                |

Table S12

| Thioxanthone                                  |                 | Gaseous        |                |                |                | CPCM           |                |                |                |
|-----------------------------------------------|-----------------|----------------|----------------|----------------|----------------|----------------|----------------|----------------|----------------|
| 2,2'-MeOTX                                    |                 | S <sub>1</sub> | S <sub>2</sub> | T <sub>1</sub> | T <sub>2</sub> | S <sub>1</sub> | S <sub>2</sub> | T <sub>1</sub> | T <sub>2</sub> |
| <br>2,7-dimethoxythioxanthone<br>(2,2'-MeOTX) | Energy (kJ/mol) | 302            | 342            | 235            | 299            | 291            | 352            | 225            | 310            |
|                                               | Character       | $\pi\pi^*$     | $n\pi^*$       | $\pi\pi^*$     | $n\pi^*$       | $\pi\pi^*$     | $n\pi^*$       | $\pi\pi^*$     | $n\pi^*$       |
|                                               | $\Delta n-p$    | 40 kJ/mol      |                | 64 kJ/mol      |                | 61 kJ/mol      |                | 86 kJ/mol      |                |

Table S13

## Synthesis of Novel Photochemical Precursors

### Amino cinnamate 8

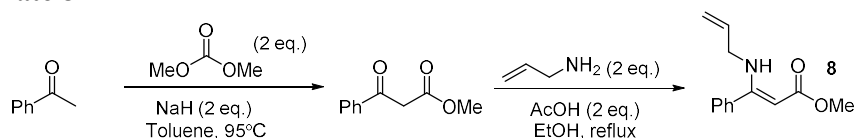

Scheme S3

A stirred suspension of NaH (60% on oil, 32 g, 800 mmol) in toluene (300 ml) with dimethyl carbonate (68 ml, 808 mmol) was heated to 95°C in a 1 L flask with an overhead stirrer and condenser. A solution of acetophenone (46.6 ml, 400 mmol) in toluene (100 ml) was added dropwise to allow for a controlled exotherm and H<sub>2</sub> evolution. After the addition was complete, heating was continued for 1 hour before the solution was cooled in an ice bath and quenched with acetic acid (23 ml, 400 mmol) and 1 M HCl (400 ml). The biphasic mixture was separated and the aqueous layer further extracted with EtOAc (2×150 ml) before the pooled organic extracts were washed with brine, dried (MgSO<sub>4</sub>), filtered and concentrated *in vacuo*. The resulting oil was filtered through silica with pet. ether 40/60, then Et<sub>2</sub>O and the solution evaporated under reduced pressure to give the 1,3-keto ester as an oil (71.5 g, 100%). 53.5 g (300 mmol) of this oil, along with allylamine (45 ml, 600 mmol) and acetic acid (34 ml, 600 mmol) was added to EtOH (300 ml) in a 1 L flask and the solution refluxed for 3 hours until all keto-ester had been consumed. The cooled solution was concentrated, purified by chromatography on silica (10-20% Et<sub>2</sub>O in petrol) and concentrated to an oil (52 g) which was re-dissolved in petrol (50 ml), cooled in a freezer at -20°C and the resulting suspension rapidly filtered to give **8** as a white solid (47.5 g, 73%): m.p. 35 – 36 °C;  $\delta_{\text{H}}$  (400 MHz, CDCl<sub>3</sub>) 8.61 (1H, s, NH), 7.43 – 7.32 (5H, m, Ar.H), 5.78 (1H, ddt,  $J$  = 17.1, 10.1, 4.9 Hz, CH=CHH), 5.21 (1H, app. dq,  $J$  = 17.1, 1.7 Hz, CH=CHH), 5.11 (1H, app. dq,  $J$  = 10.3, 1.6 Hz, CH=CHH), 4.64 (1H, s, CH=C), 3.72 – 3.64 (5H, m, NCH<sub>2</sub>, OCH<sub>3</sub>);  $\delta_{\text{C}}$  (101 MHz, CDCl<sub>3</sub>) 170.9 (C), 165.1 (C), 136.0 (C), 135.5 (CH), 129.5 (CH), 128.5 (2×CH), 127.9 (2×CH), 116.0 (CH<sub>2</sub>), 85.5 (CH), 50.4 (CH<sub>2</sub>), 46.9 (CH<sub>3</sub>); ESI-HRMS  $m/z$  218.1180 (MH<sup>+</sup> C<sub>13</sub>H<sub>16</sub>NO<sub>2</sub> requires 218.1176)

## Boc protection to 25

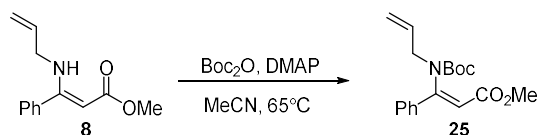

Scheme S4

To a solution of amino cinnamate **8** (21.7 g, 100 mol) in MeCN (100 ml) was added Boc<sub>2</sub>O (28.3 g, 130 mmol) and DMAP (0.61 g, 5 mmol) and the mixture heated to 65°C. After gas evolution had ceased, additional Boc<sub>2</sub>O (16.7 g, 77 mmol) was added portionwise. The solution was concentrated and purified by chromatography on silica (10-20% Et<sub>2</sub>O in petrol) to give **25** as a solid (19.0 g, 60%): m.p. 60 – 61 °C;  $\delta_{\text{H}}$  (400 MHz, CDCl<sub>3</sub>) 7.40 – 7.29 (5H, m, Ar.**H**), 5.92 (1H, ddt,  $J$  = 17.0, 10.6, 5.4 Hz, **CH=CHH**), 5.86 (1H, s, **CH=C**), 5.25 – 5.16 (2H, m, **CH=CHH**), 4.24 (2H, app. dt,  $J$  = 5.4, 1.6 Hz, **NCH<sub>2</sub>**), 3.56 (3H, s, **OCH<sub>3</sub>**), 1.15 (9H, s, 3×**CH<sub>3</sub>**);  $\delta_{\text{C}}$  (101 MHz, CDCl<sub>3</sub>) 167.0 (C), 156.1 (C), 153.7 (C), 136.9 (C), 133.6 (CH), 129.4 (CH), 128.8 (2×CH), 127.8 (2×CH), 117.1 (CH<sub>2</sub>), 109.7 (CH), 81.8 (C), 53.3 (CH<sub>2</sub>), 51.3 (CH<sub>3</sub>), 27.8 (3×CH<sub>3</sub>); ESI-HRMS  $m/z$  318.1699 (MH<sup>+</sup> C<sub>18</sub>H<sub>24</sub>NO<sub>4</sub> requires 318.1700)

## $\alpha$ -amido acrylate 13

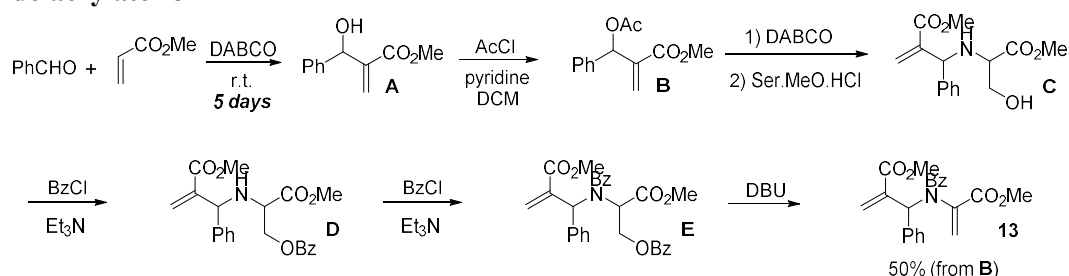

Scheme S5

**Solvent-free Baylis-Hillman :** A mixture of methyl acrylate (333 mmol, 1.0 eq.), benzaldehyde (333 mmol, 1.0 eq.) and DABCO (20 mol %) was stirred at room temp for 5 days before pouring over 1 M HCl (250 ml) and extracting with EtOAc (3×200 ml). The organic extracts were dried (MgSO<sub>4</sub>), filtered and evaporated to an oil (62.9 g) containing ~15 mol. % benzaldehyde. The product **A** was of sufficient purity to use in next step.

**Acylation:** To an ice cooled solution of the above Baylis-Hillman adduct **A** in DCM (~300 mmol; 2M), and pyridine (1.15 eq), was added acetyl chloride (1.15 eq.) dropwise. The mixture was allowed to warm to room temperature and stirring continued until the alcohol was fully consumed (monitored by tlc). The concentration was halved by the addition of more DCM and the mixture washed with 1 M HCl (×2) and water. The solution was dried (MgSO<sub>4</sub>), filtered and evaporated to give **B** as an oil containing residual benzaldehyde as an impurity (~15%). Yield ≈ 83% (2-steps)

**Ser-OMe.HCl:** Acetyl chloride (2.5 eq) was added dropwise to MeOH (600 ml) before the portionwise addition of DL-serine (0.5 mol, 1.0 eq.) and the mixture refluxed for 2 hrs. The solvent was evaporated, the product was triturated with Et<sub>2</sub>O, filtered and washed (Et<sub>2</sub>O) before drying to a free-flowing powder (76 g, 98%)

**Serine Adduct C:** To a 1:1 THF/Water solution of crude allylic acetate **B** (200 mmol, 1 M) cooled in an ice bath was added DABCO (2.5 eq.) The ice bath was removed and the mixture stirred for 15 min before the portionwise addition of Ser-OMe.HCl (1.2 eq.). The mixture was stirred, until the reaction had gone to completion, before removal of THF under reduced pressure. The remaining mixture was extracted with EtOAc, dried (MgSO<sub>4</sub>) and chromatography on silica (gradient elution 30% -80% EtOAc in hexane) yielded the product **C** as an oil (49g), free from benzaldehyde and as a mix of diastereomers.

**Benzoylation to E:** To a solution of **C** (~167 mmol) in DCM (1 M) was added Et<sub>3</sub>N (1.15 eq.) and the solution cooled in an ice bath after which was added BzCl (1.15 eq.) dropwise. The solution was stirred at room temperature for approx. 1 hr. before washing with 1 M HCl (×2) and brine. The solution was dried (MgSO<sub>4</sub>), filtered and evaporated to **D** an oil which was used directly for the second benzoylation. To solution of **D** in MeCN (1 M) and Et<sub>3</sub>N (1.2 eq.) was added BzCl (1.2 eq) and the mixture then heated at reflux with stirring until full consumption of the starting material (tlc monitoring). After cooling to room temperature the slurry was filtered and the solution concentrated *in vacuo* before re-dissolving in DCM and washing with 1 M HCl and brine. The solution was dried (MgSO<sub>4</sub>), filtered and evaporated to an oil which was purified by chromatography on silica (20 – 30% EtOAc in hexane) to give **E** as an oil (75g, mixture of diastereomers).

**Benzoate Elimination to 13:** To an ice cooled solution of **E** (~150 mmol) in DCM (0.6 M) was added neat DBU (1 eq.) dropwise. The ice bath was removed and stirring continued until the reaction had gone to completion (tlc monitoring). The solution was washed (sat. NaHCO<sub>3</sub>), brine and dried (MgSO<sub>4</sub>). Chromatography on silica (30% EtOAc in hexane) yielded product **13** as a white solid (40.5g, 50% from **B**): m.p. 110 – 112 °C; δ<sub>H</sub> (400 MHz, CDCl<sub>3</sub>) 7.55 – 7.50 (2H, m, Ar.H), 7.38 – 7.23 (8H, m, Ar.H), 6.71 (1H, br. s, PhCH), 6.56 (1H, app. t, *J* = 1.0 Hz, CHH=C), 5.99 – 5.97 (1H, m, CHH=C), 5.96 (1H, d, *J* = 0.7 Hz, CHH=C), 5.45 (1H, d, *J* = 0.7 Hz, CHH=C), 3.70 (3H, s, CH<sub>3</sub>), 3.43 (3H, s, CH<sub>3</sub>); δ<sub>C</sub> (101 MHz, CDCl<sub>3</sub>) 171.1 (C), 166.6 (C), 164.8 (C), 139.5 (C), 139.4 (C), 136.5 (C), 136.3 (C), 130.5 (CH), 129.7 (2×CH), 128.4 (2×CH), 128.3 (2×CH), 128.2 (2×CH), 128.1 (CH), 127.8 (CH<sub>2</sub>), 124.8 (CH<sub>2</sub>), 62.5 (CH), 52.3 (CH<sub>3</sub>), 52.2 (CH<sub>3</sub>); ESI-HRMS *m/z* 380.1496 (MH<sup>+</sup> C<sub>22</sub>H<sub>22</sub>NO<sub>5</sub> requires 380.1498)

### Amido styrene 23

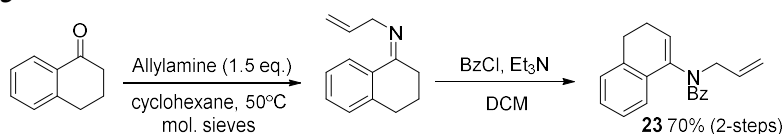

Scheme S6

A solution of α-tetralone (100g, 684 mmol) and allylamine (77 ml, 1.03 mol) in cyclohexane (250 ml) was stirred over 3Å molecular sieves, 3-5 mm beads, (140 g) in a 1 L flask, heated at 50°C for 90 hrs (95% conversion). The mixture was filtered through celite, concentrated *in vacuo* and the resulting oil poured over DCM (500 ml), cooled in an ice bath, before the addition of benzoyl chloride (79 ml, 684 mmol) then triethylamine (95 ml, 684 mmol) over about 20 mins. The fully charged vessel was allowed to warm to room temperature and stirred for 17 hrs before filtering and the filtrate washed (1M HCl, sat. aq. NaHCO<sub>3</sub> and brine), dried (MgSO<sub>4</sub>) and filtered before concentrating under reduced pressure. To the resulting oil was added hexane to allow trituration of the product before filtering to give enamide **23** as an off-white solid (139 g, 70%): m.p. 86 – 87 °C; δ<sub>H</sub> (400 MHz, CDCl<sub>3</sub>) 7.49 – 7.11 (9H, m, Ar.H), 5.99 (1H, dddd, *J* = 17.3, 10.2, 7.3, 5.4 Hz, CH<sub>2</sub>=CH), 5.52 (1H, dd, *J* = 6.0, 3.5 Hz, C=CHCH<sub>2</sub>), 5.22 – 5.09 (2H, m, CH<sub>2</sub>=CH), 4.83 (1H, dd, *J* = 14.5, 5.4 Hz, NCHHCH), 3.68 (1H, dd, *J* = 14.5, 7.3 Hz, NCHHCH), 2.73 (1H, app. td, *J* = 14.3, 6.7 Hz, CCHHCH<sub>2</sub>), 2.60 (1H, app. dt, *J* = 15.5, 5.9 Hz, CCHHCH<sub>2</sub>), 2.18 (1H, app. dq, *J* = 17.6, 6.1 Hz, CH<sub>2</sub>CHHCH), 2.00 (1H, dddd, *J* = 17.0, 13.5, 6.7, 3.5 Hz, CH<sub>2</sub>CHHCH); δ<sub>C</sub> (101 MHz, CDCl<sub>3</sub>) 171.2 (C), 138.8 (C), 137.3 (C), 136.2 (C), 133.1 (CH), 131.8 (C), 130.0 (CH), 129.4 (CH), 128.1 (CH), 128.1 (CH), 127.8 (2×CH), 127.6 (2×CH), 127.0 (CH), 122.8 (CH), 118.4 (CH<sub>2</sub>), 50.2 (CH<sub>2</sub>), 27.3 (CH<sub>2</sub>), 22.9 (CH<sub>2</sub>); ESI-HRMS *m/z* 290.1549 (MH<sup>+</sup> C<sub>20</sub>H<sub>20</sub>NO requires 290.1539)

### *N*-Bn-3-(but-3-en-1-yloxy)-maleimide (**27**)

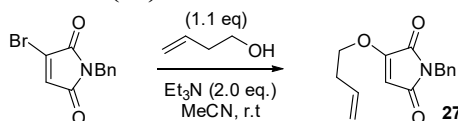

Scheme S7

A mixture of *N*-benzyl-3-bromomaleimide (16.9 g, 63.5 mmol), 3-buten-1-ol (6 ml, 70 mmol) and triethylamine (17.6 ml, 127 mmol) in MeCN (65 ml) was stirred at room temperature for 4 days. The mixture was concentrated, re-dissolved in DCM (100 ml) and washed with water (2× 50 ml), dried ( $\text{MgSO}_4$ ), filtered and concentrated to an oil which was filtered through silica with  $\text{Et}_2\text{O}$ . The solvent was removed *in vacuo*, purified by chromatography on silica (70-100% DCM in petrol) and concentrated to an oil which was triturated with petrol /  $\text{Et}_2\text{O}$ , filtered and dried to give **27** as a white solid (10.3 g, 63%): m.p. 66 - 67°C;  $\delta_{\text{H}}$  (400 MHz,  $\text{CDCl}_3$ ) 7.35 – 7.22 (5H, m, Ar.H), 5.80 (1H, ddt,  $J$  = 17.0, 10.2, 6.7 Hz, CH=CHH), 5.36 (1H, s, CH=C), 5.20 – 5.10 (2H, m, CH=CH<sub>2</sub>), 4.64 (2H, s,  $\text{NCH}_2\text{Ph}$ ), 4.05 (2H, t,  $J$  = 6.8 Hz,  $\text{OCH}_2\text{CH}_2$ ), 2.57 (2H, app. qt,  $J$  = 6.8, 1.3 Hz,  $\text{OCH}_2\text{CH}_2$ );  $\delta_{\text{C}}$  (101 MHz,  $\text{CDCl}_3$ ) 170.1 (C), 165.5 (C), 160.2 (C), 136.4 (C), 132.6 (CH), 128.8 (2×CH), 128.6 (2×CH), 127.9 (CH), 118.6 (CH<sub>2</sub>), 96.6 (CH), 71.7 (CH<sub>2</sub>), 41.3 (CH<sub>2</sub>), 32.7 (CH<sub>2</sub>); ESI-HRMS  $m/z$  280.0940 ( $\text{MNa}^+$   $\text{C}_{15}\text{H}_{15}\text{NO}_3\text{Na}$  requires 280.0944)

## Novel Reactor Configurations

### Parallel NMR Tube Irradiations

For rapid screening of the sensitizer series, a simple new method was devised to save time and material. Irradiations were carried out directly in standard NMR tubes using deuterated acetonitrile. Stock solutions of the substrate (5 ml, 0.1 – 0.2 M) were prepared in a 5 ml volumetric flask, with adiponitrile (0.5 eq) as an internal standard if necessary, before dispensing 0.4 ml aliquots into individual NMR tubes containing the sensitizer of interest. The solutions were then irradiated in parallel with a 9 W PL-S UVA lamp by holding the tubes equidistant from the lamp (1-2 mm) using an improvised tube holder (Figure S10). The low power output of the lamp meant that external cooling was not required.

The reaction progress was monitored periodically by  $^1\text{H}$ -NMR. By using this method, the entire sensitizer series could be screened within a working day, without the need for sample preparation, and using just 0.5 – 1.0 mmol of the substrate.

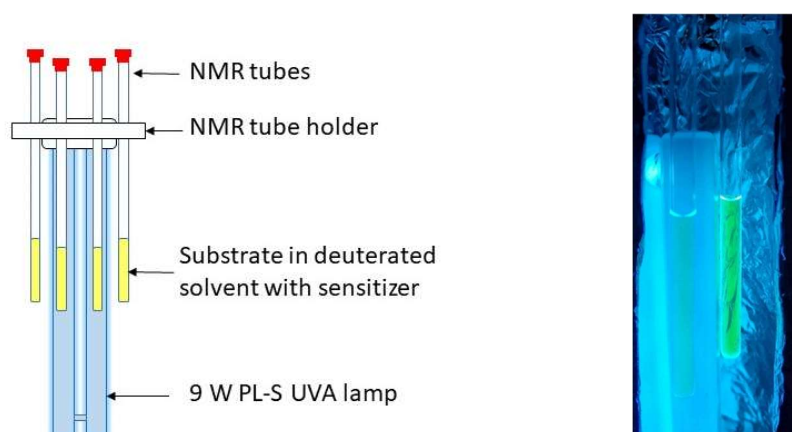

Figure S10: Parallel NMR tube irradiations with 9 W pl-s lamp

### 36 W Blue COB Reactor Configuration

To investigate the efficacy of the visible light absorbing TX derivatives as ‘energy transfer photocatalysts’ it was necessary to construct a novel reactor based around a high-intensity blue light source. Reported reactors for visible light photocatalysis are usually based around SMD (Surface Mount Device) LED chips. Single colour, high power SMD LEDs typically operate at about 1 – 3 W, have about 1- 3 individual diodes in a single housing and must be connected in arrays if more power / light intensity is required.

COB (Chip On board) LEDs have many more diodes (> 9) mounted on a single surface and can offer much higher power densities without having to connect multiple chips in an array. These devices can be commonly found in high power white LED spotlights. The white light is produced by a phosphor film over an LED chip which down-converts a higher energy light source to the full range of visible colours. . In the case of white COB LEDs the phosphor is driven by the much easier / cheaper to access emission from blue LEDs. As a result, all white COB chips have at their centre a powerful source of blue light which is ideal for many photoredox catalysts and lower energy triplet sensitizers which can be excited by visible light. Interestingly, ‘naked’ blue COB chips have only relatively recently become commercially available. LED manufacturer Citizen produce such chips for aquariums, swimming pools and architectural use.

A tray of the 34.6 V, 22 mm COB chips was ordered for initial investigations based on the convenient chip size and availability of a compact 36 W 1.05 A constant current driver. The peak wavelength is 455 nm and the emission spans from approximately 430 – 480 nm.

### 36 W Blue COB Reactor Construction

The key requirements of a photochemical batch reactor are:

- 1) light source in optimal position to ensure efficient light delivery to solution
- 2) a means of stirring solution and
- 3) effective heat management.

Reported visible light mediated photoredox reactions are often driven by a 40 W Kessil lamp or a flexible LED strip placed side-on and a few centimetres away from a vial containing the reaction solution (Figure S11, left). The overall light capture is poor and as a result the reactions are often left on overnight to drive a successful reaction to completion. The side-on method of irradiation is necessary since the vials are stirred over a magnetic stirrer and there is no room below for the bulky commercial light source.

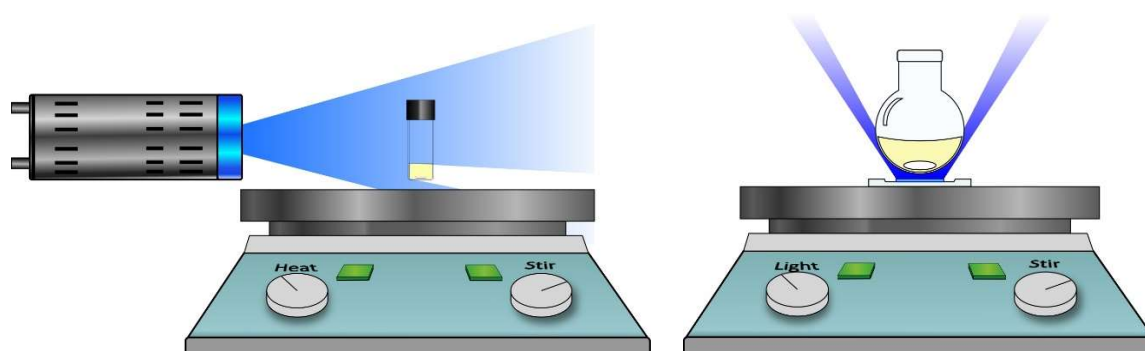

**Figure S11** - *Left*: Inefficient side-on irradiation with external Kessil lamps over magnetic stirrer; *Right*: Novel integrated COB LED and magnetic stirrer for efficient light capture

The use of a COB LED allows for efficient stirring with simultaneous irradiation since the flat COB chip can be mounted directly onto the metal surface of a magnetic stirrer without affecting its ability to stir (Figure S11, right). In this way, a vessel can be magnetically stirred directly over the high intensity

discharge of the COB. In the case of the 36 W COB used, it was assumed the metal body of the stirrer should allow for sufficient heat dissipation and so prevent the COB chip overheating.

The reactor was based around a Heidolph stirrer hotplate with broken heating controls (Figure S12). The heating circuitry could be removed and replaced with the LED driver which fortuitously fit neatly within the resulting cavity. As a result, the driver could be wired internally onto the original heating switch allowing for a compact and safe design with minimal effort. The LED COB was fixed to the plate with a commercially available mount and a couple of screws tapped into the metal surface. Thermal contact was made with some thermal paste.

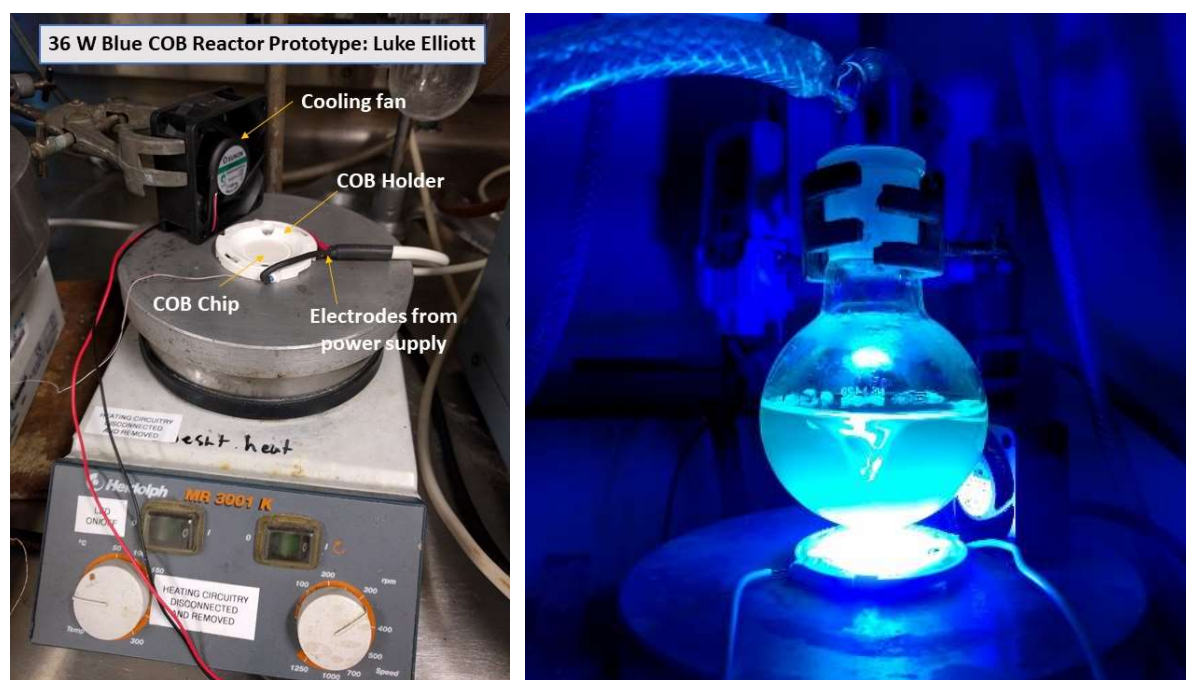

**Figure S12:** Working prototype of the 36 W blue COB reactor

Stirring acetonitrile in a 50 ml rbf over the 36 W COB resulted in rapid heating of the solvent to near reflux and so a fan was introduced to the side of the vessel. This allowed the temperature to be maintained below 40°C and also assisted in cooling the surface of the stirrer. Additional control over the temperature could involve a small double jacketed vessel or cold-finger.

## TX Sensitizer Screening Studies

### Alkene Isomerization Studies in NMR Tubes

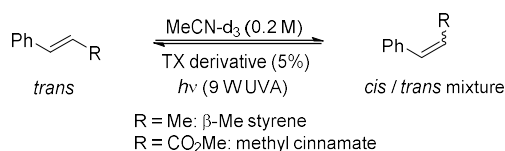

**Scheme S8**

A stock solution was prepared in a 5 ml volumetric flask using 1 mmol of the relevant *trans*-styrene derivative and deuterated acetonitrile (0.2 M). For each irradiation, 0.5 ml aliquots were added to an NMR tube containing the relevant thioxanthone derivative (5 mol%) before gently warming to ensure the sensitizer was fully dissolved. The NMR tube was placed against a low pressure 9 W PL-S UVA lamp and the isomeric ratio was monitored every 15 mins by <sup>1</sup>H-NMR.

|             | <i>trans</i> : <i>cis</i> |              | 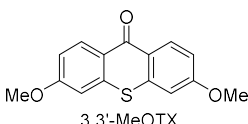<br>3,3'-MeOTX |
|-------------|---------------------------|--------------|--------------------------------------------------------------------------------------------------|
| Time / mins | $\beta$ -Me styrene       | Me-cinnamate |                                                                                                  |
| 15          | 1 : 1.09                  | 1 : 0.87     |                                                                                                  |
| 30          | 1 : 1.15                  | 1 : 1.03     |                                                                                                  |
| 45          | 1 : 1.15                  | 1 : 1.04     |                                                                                                  |

**Table S14: 3,3'-MeOTX**

|             | <i>trans</i> : <i>cis</i> |              | 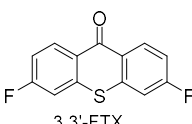<br>3,3'-FTX |
|-------------|---------------------------|--------------|------------------------------------------------------------------------------------------------|
| Time / mins | $\beta$ -Me styrene       | Me-cinnamate |                                                                                                |
| 15          | 1 : 0.97                  | 1 : 0.76     |                                                                                                |
| 30          | 1 : 1.13                  | 1 : 1.00     |                                                                                                |
| 45          | 1 : 1.14                  | 1 : 1.03     |                                                                                                |

**Table S15: 3,3'-FTX**

|             | <i>trans</i> : <i>cis</i> |              | 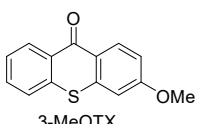<br>3-MeOTX |
|-------------|---------------------------|--------------|-----------------------------------------------------------------------------------------------|
| Time / mins | $\beta$ -Me styrene       | Me-cinnamate |                                                                                               |
| 15          | 1 : 1.03                  | 1 : 1.02     |                                                                                               |
| 30          | 1 : 1.23                  |              |                                                                                               |
| 60          | 1 : 1.23                  | 1 : 1.05     |                                                                                               |

**Table S16: 3-MeOTX**

|             | <i>trans</i> : <i>cis</i> |              | 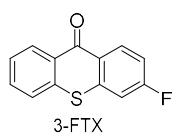<br>3-FTX |
|-------------|---------------------------|--------------|----------------------------------------------------------------------------------------------|
| Time / mins | $\beta$ -Me styrene       | Me-cinnamate |                                                                                              |
| 15          | 1 : 0.88                  | 1 : 0.77     |                                                                                              |
| 30          | 1 : 1.19                  | 1 : 1.00     |                                                                                              |
| 45          | 1 : 1.24                  | 1 : 1.04     |                                                                                              |
| 60          | 1 : 1.23                  |              |                                                                                              |

**Table S17: 3-FTX**

|             | <i>trans</i> : <i>cis</i> |              | 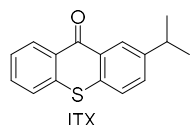<br>ITX |
|-------------|---------------------------|--------------|---------------------------------------------------------------------------------------------|
| Time / mins | $\beta$ -Me styrene       | Me-cinnamate |                                                                                             |
| 15          | 1 : 1.22                  |              |                                                                                             |
| 30          | 1 : 1.57                  | 1 : 1.10     |                                                                                             |
| 45          | 1 : 1.64                  | 1 : 1.11     |                                                                                             |
| 60          | 1 : 1.63                  |              |                                                                                             |

**Table S18: ITX**

|             | <i>trans</i> : <i>cis</i> |              | 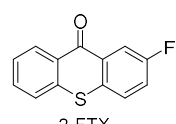<br>2-FTX |
|-------------|---------------------------|--------------|-----------------------------------------------------------------------------------------------|
| Time / mins | $\beta$ -Me styrene       | Me-cinnamate |                                                                                               |
| 15          | 1 : 1.50                  | 1 : 0.83     |                                                                                               |
| 30          | 1 : 1.83                  | 1 : 1.12     |                                                                                               |
| 45          | 1 : 1.86                  | 1 : 1.15     |                                                                                               |
| 60          | 1 : 1.88                  |              |                                                                                               |

**Table S19: 2-FTX**

|             | <i>trans</i> : <i>cis</i> |              | 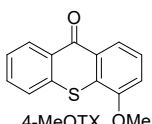<br>4-MeOTX |
|-------------|---------------------------|--------------|-------------------------------------------------------------------------------------------------|
| Time / mins | $\beta$ -Me styrene       | Me-cinnamate |                                                                                                 |
| 15          | 1 : 1.05                  | 1 : 0.78     |                                                                                                 |
| 30          | 1 : 1.90                  | 1 : 1.11     |                                                                                                 |
| 45          | 1 : 2.09                  | 1 : 1.18     |                                                                                                 |
| 60          | 1 : 2.13                  | 1 : 1.21     |                                                                                                 |

**Table S20: 4-MeOTX**

|             | <i>trans</i> : <i>cis</i> |              | 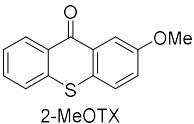<br>2-MeOTX |
|-------------|---------------------------|--------------|-----------------------------------------------------------------------------------------------|
| Time / mins | $\beta$ -Me styrene       | Me-cinnamate |                                                                                               |
| 15          | 1 : 2.32                  | 1 : 1.06     |                                                                                               |
| 30          | 1 : 4.91                  | 1 : 1.47     |                                                                                               |
| 45          | 1 : 4.82                  | 1 : 1.52     |                                                                                               |
| 60          | 1 : 4.82                  |              |                                                                                               |

**Table S21: 2-MeOTX**

|             | <i>trans</i> : <i>cis</i> |              | 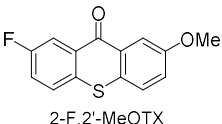<br>2-F,2'-MeOTX |
|-------------|---------------------------|--------------|----------------------------------------------------------------------------------------------------|
| Time / mins | $\beta$ -Me styrene       | Me-cinnamate |                                                                                                    |
| 15          | 1 : 1.72                  | 1 : 1.31     |                                                                                                    |
| 30          | 1 : 4.66                  | 1 : 1.73     |                                                                                                    |
| 45          | 1 : 4.92                  | 1 : 1.73     |                                                                                                    |
| 60          | 1 : 4.97                  |              |                                                                                                    |

**Table S22: 2-F,2'-MeOTX**

|             | <i>trans</i> : <i>cis</i> |              | 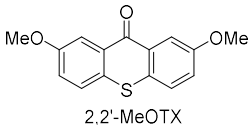<br>2,2'-MeOTX |
|-------------|---------------------------|--------------|--------------------------------------------------------------------------------------------------|
| Time / mins | $\beta$ -Me styrene       | Me-cinnamate |                                                                                                  |
| 15          | 1 : 2.02                  | 1 : 1.17     |                                                                                                  |
| 30          | 1 : 3.70                  | 1 : 1.48     |                                                                                                  |
| 45          | 1 : 3.55                  | 1 : 1.46     |                                                                                                  |

**Table S23: 2,2'-MeOTX**

## Sensitizer Screen with 125 W, 150 ml Immersion Well Reactor

### Enamide (1) to 2,4-methanopyrrolidine (2)

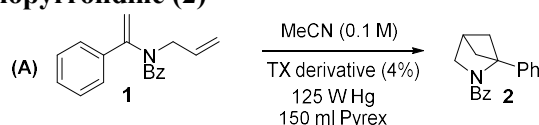

**Scheme S9**

The general immersion well batch irradiation procedure was followed using a 125 W Hg lamp and 150 ml Pyrex reactor. A solution of enamide **1** (3.95 g, 15 mmol) in degassed MeCN (150 ml) was irradiated with the relevant thioxanthone derivative (0.6 mmol) and the reaction monitored by quantitative <sup>1</sup>H-NMR using 1,3,5-trimethoxybenzene as an internal standard.

| Sensitizer (4 mol %)        |          |        |       |     |     |     |       |       |          |
|-----------------------------|----------|--------|-------|-----|-----|-----|-------|-------|----------|
| Time (min)                  | 3,3'-MeO | 3,3'-F | 3-MeO | 3-F | ITX | 2-F | 4-MeO | 2-MeO | 2,2'-MeO |
| 30                          | 20       | 21     | 21    | 23  | 23  | 26  | 28    | 28    | 24       |
| 60                          | 36       | 41     | 46    | 42  | 45  | 52  | 55    | 49    |          |
| 150                         | 93       | 99     | 99    | 97  | 94  | 95  | 96    | 100   | 92       |
| Initial productivity mmol/h | 5.4      | 6.2    | 6.9   | 6.3 | 6.8 | 7.8 | 8.3   | 7.4   | 7.2      |

**Table S24**

### THPA (3) to Cyclobutene (7)

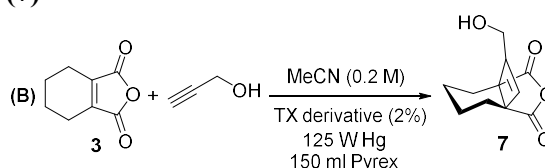

**Scheme S10**

The general immersion well batch irradiation procedure was followed using a 125 W Hg lamp and 150 ml Pyrex reactor. A solution of THPA **3** (4.56 g, 30 mmol) and propargyl alcohol (2.62 ml, 45 mmol)



in degassed MeCN (150 ml) was irradiated with the relevant thioxanthone derivative (0.6 mmol) and the reaction monitored by quantitative <sup>1</sup>H-NMR using 1,3,5-trimethoxybenzene as an internal standard.

| Time (min)                  | Sensitizer (4 mol %) |        |       |     |     |     |       |       |          |
|-----------------------------|----------------------|--------|-------|-----|-----|-----|-------|-------|----------|
|                             | 3,3'-MeO             | 3,3'-F | 3-MeO | 3-F | ITX | 2-F | 4-MeO | 2-MeO | 2,2'-MeO |
| 20                          | 24                   | 29     | 23    | 28  | 27  | 28  | 9     |       | /        |
| 40                          | 48                   | 58     | 47    | 55  | 58  | 59  | 17    |       | /        |
| 60                          | 70                   | 74     | 68    | 70  | 75  | 74  | 26    | 6     | /        |
| Initial productivity mmol/h | 22                   | 26     | 21    | 25  | 24  | 25  | 8     | 1.8   | 0        |

Table S25

### Cross [2+2] / retro-Mannich of (**8**) to (**10**)

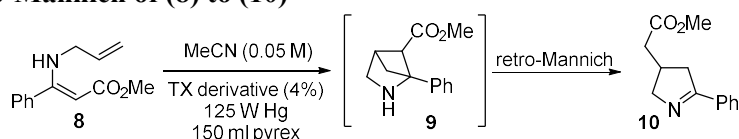

Scheme S11

A solution of enamine **8** (1.63 g, 7.5 mmol) and the relevant TX derivative (0.3 mmol) in degassed MeCN (150 ml) was irradiated in a 150 ml Pyrex immersion well batch reactor with a 125 W Hg lamp. The reaction was followed by quantitative <sup>1</sup>H-NMR using 1,3,5-trimethoxybenzene as an internal standard. When at full conversion the concentrated reaction mixture was purified by chromatography on silica (30-40% EtOAc in petrol) to yield cyclic imine **10** as a pale orange oil.

$\delta_{\text{H}}$  (400 MHz, CDCl<sub>3</sub>) 7.85 – 7.78 (2H, m, Ar.**H**), 7.45 – 7.36 (3H, m, Ar.**H**), 4.26 (1H, app. ddt,  $J$  = 16.4, 8.0, 1.8 Hz, NCHH), 3.74 (1H, ddt,  $J$  = 16.4, 5.4, 1.9 Hz, NCHH), 3.69 (3H, s, OCH<sub>3</sub>), 3.21 (1H, app. ddt,  $J$  = 17.0, 9.0, 1.8 Hz, CHH), 2.94 – 2.82 (1H, m, CH), 2.70 (1H, app. ddt,  $J$  = 17.0, 5.7, 1.9 Hz, CHH), 2.53 – 2.40 (2H, m, CH<sub>2</sub>);  $\delta_{\text{C}}$  (101 MHz, CDCl<sub>3</sub>) 173.0 (C), 172.6 (C), 134.5 (C), 130.6 (CH), 128.6 (2×CH), 127.6 (2×CH), 66.9 (CH<sub>2</sub>), 51.8 (CH<sub>3</sub>), 41.2 (CH<sub>2</sub>), 39.3 (CH<sub>2</sub>), 33.5 (CH); ESI-HRMS  $m/z$  218.1175 (MH<sup>+</sup> C<sub>13</sub>H<sub>16</sub>NO<sub>2</sub> requires 218.1176)

| time / min   | Sensitizer (4 mol%) |          |         |        |      |        |        |          |
|--------------|---------------------|----------|---------|--------|------|--------|--------|----------|
|              | 3,3'-MeOTX          | 3,3'-FTX | 3-MeOTX | 3-FTX* | ITX* | 2-FTX* | 4-MeO* | 2-MeOTX* |
| 0            | 0                   | 0        | 0       | 0      | 0    |        | 0      | 0        |
| 30           | 22                  | 25       | 24      |        | 31   |        | 30     | 22       |
| 60           | 38                  | 43       | 41      |        | 50   |        | 53     | 30       |
| 90           | 56                  | 54       | 57      | 47     | 50   | 40     | 56     | 30       |
| 120          | 72                  | 63       | 64      |        |      |        | 44     | 30       |
| 150          | 78                  | 62       | 62      |        |      |        |        |          |
| Isolated (g) | 1.08                | 0.76     | 0.76    | 0.78   | 0.68 | 0.64   | 0.51   | 0.48     |
| Isolated (%) | 67%                 | 47%      | 47%     | 48%    | 42%  | 39%    | 31%    | 29%      |

\* Full consumption of starting enamine observed but product integration inaccurate due to significant degradation by-products

Table S26

## Cross [2+2] Sensitizer Screen in NMR Tubes

A stock solution was prepared in a 5 ml volumetric flask using 0.5 mmol of the relevant  $\alpha$ -amido acrylate derivative and adiponitrile (0.25 mmol) in deuterated acetonitrile (0.1 M). For each irradiation, 0.4 ml aliquots were added to an NMR tube containing the relevant thioxanthone derivative (10 mol%) before gently warming to ensure the sensitizer was fully dissolved. The NMR tube was placed against a low pressure 9 W PL-S UVA lamp and reaction was monitored every 15 mins by  $^1\text{H}$ -NMR.

### $\alpha$ -amido acrylate (11) to 2,4-methanoproline (12)

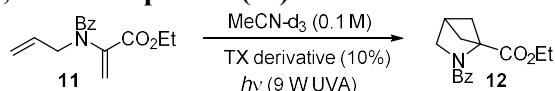

Scheme S12

### $\alpha$ -amido acrylate (13) to 2,4-methanoproline (14)

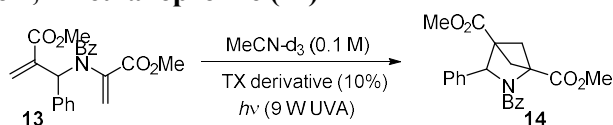

Scheme S13

|            | Reaction D         |                    | Reaction E         |                    | 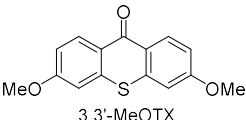<br>3,3'-MeOTX |
|------------|--------------------|--------------------|--------------------|--------------------|----------------------------------------------------------------------------------------------------|
| Time / min | s.m. <b>11</b> (%) | prod <b>12</b> (%) | s.m. <b>13</b> (%) | prod <b>14</b> (%) |                                                                                                    |
| 15         | 9                  | 73                 | 30                 | 36                 |                                                                                                    |
| 30         | 0                  | 80                 | 7                  | 52                 |                                                                                                    |

Table S27

|            | Reaction D         |                    | Reaction E         |                    | 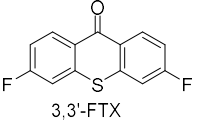<br>3,3'-FTX |
|------------|--------------------|--------------------|--------------------|--------------------|---------------------------------------------------------------------------------------------------|
| Time / min | s.m. <b>11</b> (%) | prod <b>12</b> (%) | s.m. <b>13</b> (%) | prod <b>14</b> (%) |                                                                                                   |
| 15         | 22                 | 65                 | 33                 | 33                 |                                                                                                   |
| 30         | 0                  | 84                 | 9                  | 46                 |                                                                                                   |

Table S28

|            | Reaction D         |                    | Reaction E         |                    | 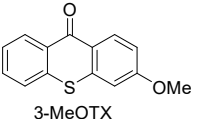<br>3-MeOTX |
|------------|--------------------|--------------------|--------------------|--------------------|--------------------------------------------------------------------------------------------------|
| Time / min | s.m. <b>11</b> (%) | prod <b>12</b> (%) | s.m. <b>13</b> (%) | prod <b>14</b> (%) |                                                                                                  |
| 15         | 1                  | 82                 | 47                 | 27                 |                                                                                                  |
| 30         | 0                  | 83                 | 17                 | 42                 |                                                                                                  |

Table S29

|            | Reaction D         |                    | Reaction E         |                    | 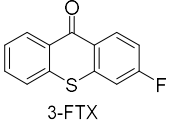<br>3-FTX |
|------------|--------------------|--------------------|--------------------|--------------------|------------------------------------------------------------------------------------------------|
| Time / min | s.m. <b>11</b> (%) | prod <b>12</b> (%) | s.m. <b>13</b> (%) | prod <b>14</b> (%) |                                                                                                |
| 15         | 20                 | 64                 | 47                 | 25                 |                                                                                                |
| 30         | 3                  | 78                 | 17                 | 40                 |                                                                                                |

Table S30

|            | Reaction D         |                    | Reaction E         |                    | 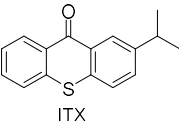<br>ITX |
|------------|--------------------|--------------------|--------------------|--------------------|----------------------------------------------------------------------------------------------|
| Time / min | s.m. <b>11</b> (%) | prod <b>12</b> (%) | s.m. <b>13</b> (%) | prod <b>14</b> (%) |                                                                                              |
| 15         | 20                 | 66                 | 76                 | 10                 |                                                                                              |
| 30         | 2                  | 80                 | 56                 | 18                 |                                                                                              |

Table S31

|            | Reaction D         |                    | Reaction E         |                    | 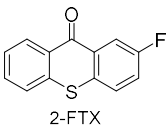<br>2-FTX |
|------------|--------------------|--------------------|--------------------|--------------------|----------------------------------------------------------------------------------------------|
| Time / min | s.m. <b>11</b> (%) | prod <b>12</b> (%) | s.m. <b>13</b> (%) | prod <b>14</b> (%) |                                                                                              |
| 15         | 27                 | 57                 | 53                 | 5                  |                                                                                              |
| 30         | 2                  | 76                 | 73                 | 9                  |                                                                                              |

Table S32

|            | Reaction D         |                    | Reaction E         |                    | 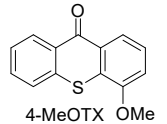<br>4-MeOTX OMe |
|------------|--------------------|--------------------|--------------------|--------------------|----------------------------------------------------------------------------------------------------|
| Time / min | s.m. <b>11</b> (%) | prod <b>12</b> (%) | s.m. <b>13</b> (%) | prod <b>14</b> (%) |                                                                                                    |
| 15         | 47                 | 37                 |                    |                    |                                                                                                    |
| 30         | 27                 | 57                 | 75                 | 8                  |                                                                                                    |

Table S33

|            | Reaction D         |                    | Reaction E         |                    | 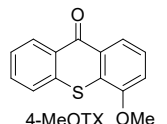<br>4-MeOTX OMe |
|------------|--------------------|--------------------|--------------------|--------------------|----------------------------------------------------------------------------------------------------|
| Time / min | s.m. <b>11</b> (%) | prod <b>12</b> (%) | s.m. <b>13</b> (%) | prod <b>14</b> (%) |                                                                                                    |
| 15         | 47                 | 37                 |                    |                    |                                                                                                    |
| 30         | 27                 | 57                 | 75                 | 8                  |                                                                                                    |

Table S34

|            | Reaction D         |                    | Reaction E         |                    | 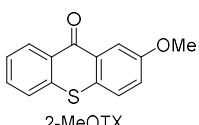<br>2-MeOTX |
|------------|--------------------|--------------------|--------------------|--------------------|------------------------------------------------------------------------------------------------|
| Time / min | s.m. <b>11</b> (%) | prod <b>12</b> (%) | s.m. <b>13</b> (%) | prod <b>14</b> (%) |                                                                                                |
| 15         | 79                 | 4                  |                    |                    |                                                                                                |
| 60         |                    |                    | 86                 | 2                  |                                                                                                |

Table S35

### Preparative Scale Synthesis of 2,4-methanoproline (**14**)

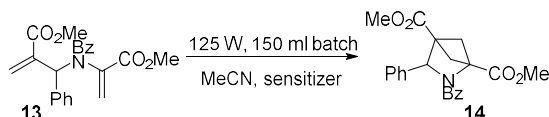

| Entry | Sensitizer (mol %) | Conc. (M) | Time (h) | Yield (%) | Mass (g) |
|-------|--------------------|-----------|----------|-----------|----------|
| 1     | BP (10)            | 0.05      | 9        | 46        | 1.3      |
| 2     | ITX (10)           | 0.05      | 12       | 38        | 1.1      |
| 3     | 3-FTX (10)         | 0.05      | 5        | 51        | 1.45     |
| 4     | 3,3'-MeOTX (5)     | 0.1       | 3        | 56        | 3.2      |
| 5     | 3,3'-MeOTX (2.5)   | 0.2       | 7        | 51        | 5.8      |

Table S36

The general immersion well batch irradiation procedure was followed using a 125 W Hg lamp and 150 ml Pyrex reactor. In all cases the sensitizer concentration was fixed at 0.005 M. When the reaction had reached full conversion, the solution was concentrated and triturated with Et<sub>2</sub>O, filtered and the residue washed with Et<sub>2</sub>O to yield product **14** as a white solid: m.p. 170 – 171°C;  $\delta_{\text{H}}$  (400 MHz, CDCl<sub>3</sub>) 7.43 – 7.29 (8H, m, Ar.**H**), 7.15 – 7.09 (2H, m, Ar.**H**), 4.95 (1H, s, N**CH**), 3.85 (3H, s, O**CH**<sub>3</sub>), 3.61 (3H, s, O**CH**<sub>3</sub>), 2.63 (1H, d, *J* = 7.3 Hz, C**HH**), 2.58 (1H, dd, *J* = 10.0, 8.3 Hz, C**HH**), 2.26 – 2.20 (2H, m, C**HH**, C**HH**);  $\delta_{\text{C}}$  (101 MHz, CDCl<sub>3</sub>) 177.0 (C), 169.2 (C), 168.3 (C), 138.4 (C), 134.1 (C), 131.6 (CH), 128.6 (2×CH), 128.4 (CH), 128.3 (2×CH), 128.0 (2×CH), 127.7 (2×CH), 67.6 (CH), 67.4 (C), 53.7 (C), 52.5 (CH<sub>3</sub>), 52.1 (CH<sub>3</sub>), 48.3 (CH<sub>2</sub>), 38.8 (CH<sub>2</sub>); ESI-HRMS *m/z* 380.1489 (MH<sup>+</sup> C<sub>22</sub>H<sub>22</sub>NO<sub>5</sub> requires 380.1492)

## Blue Light Mediated Reactions with 36 W, 455 nm COB Reactor

### General procedure

A solution of the relevant substrate in degassed solvent was added to a multi-necked round bottom flask connected to a nitrogen line. The headspace was purged with N<sub>2</sub> several times before the addition of 2,2'-MeOTX. The solution was stirred over the modified hotplate COB reactor (see above) from a distance of approximately 15 mm, with fan cooling. Sample were taken periodically for quantitative analysis by <sup>1</sup>H-NMR using 1,3,6-trimethoxybenzene as an internal standard (see general batch irradiation procedure above) to determine the precise endpoint of the reaction for accurate reactor comparison.

### Intramolecular [2+2] of Styrene 15

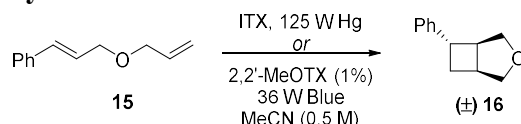

Scheme S14

**125 W Batch Irradiation:** The general immersion well batch procedure was followed using a 125 W Hg lamp and 150 ml Pyrex reactor to irradiate allylic ether **15** (2.61 g, 15 mmol) in degassed MeCN (0.1 M) with ITX (191 mg, 0.75 mmol). After 2.75 hrs the reaction mixture was concentrated *in vacuo* and chromatography on silica (10% Et<sub>2</sub>O in DCM) yielded product **16** as a mixture of diastereomers (1 : 0.17), oil (2.34 g, 90%)

**36 W Blue COB Irradiation:** The general 36 W COB reactor procedure was followed by irradiating allylic ether **15** (1.74 g, 10 mmol) in degassed MeCN (0.5 M) with 2,2'-MeOTX (27 mg, 0.1 mmol) in a 50 ml flask for 3 hrs. The reaction mixture was concentrated *in vacuo* and chromatography on silica (10% Et<sub>2</sub>O in DCM) yielded product **16** as a mixture of diastereomers (1 : 0.15), oil (1.54 g, 89%)

### Intramolecular [2+2] of Styrene 17

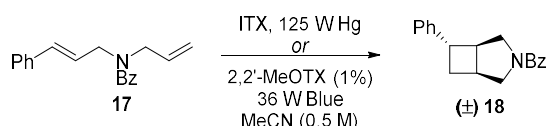

Scheme S15

**125 W Batch Irradiation:** The general immersion well batch procedure was followed using a 125 W Hg lamp and 150 ml Pyrex reactor to irradiate allylic amide **17** (4.16 g, 15 mmol) in degassed MeCN (0.1 M) with ITX (191 mg, 0.75 mmol). After 3.5 hrs the reaction mixture was concentrated *in vacuo* and chromatography on silica (30% EtOAc in petrol) yielded product **18** as a rotameric mixture of diastereomers, oil (4.02 g, 97%) Major diastereomer:  $\delta_{\text{H}}$  (500 MHz, DMSO-d<sub>6</sub>, 100°C) 7.57 – 7.44 (5H, m, Ar.H), 7.33 – 7.16 (5H, m, Ar.H), 3.90 – 3.70 (2H, m, 2×NCHH), 3.56 (1H, dd,  $J$  = 12.3, 6.6 Hz, NCHH), 3.45 (1H, dd,  $J$  = 12.3, 5.2 Hz, NCHH), 3.26 – 3.20 (1H, m, CH), 3.02 – 2.93 (2H, m, CH, CH), 2.33 – 2.25 (1H, m, CHH), 2.17 – 2.09 (1H, m, CHH);  $\delta_{\text{C}}$  (126 MHz, DMSO-d<sub>6</sub>, 120°C) 168.6 (C), 144.4 (C), 137.2 (C), 128.8 (CH), 127.7 (2×CH), 127.6 (2×CH), 126.4 (2×CH), 125.6 (2×CH), 125.3 (CH), 52.7 (CH<sub>2</sub>), 44.9 (CH), 41.5 (CH), 33.1 (CH), 31.0 (CH<sub>2</sub>); ESI-HRMS  $m/z$  278.1542 (MH<sup>+</sup> C<sub>19</sub>H<sub>20</sub>NO requires 278.1539)

**36 W Blue COB Irradiation:** The general 36 W COB reactor procedure was followed by irradiating allylic amide **17** (8.32 g, 30 mmol) in degassed MeCN (0.5 M) with 2,2'-MeOTX (82 mg, 0.3 mmol) in a 100 ml flask for 5 hrs. The reaction mixture was concentrated *in vacuo* and chromatography on

silica (30% EtOAc in petrol) yielded product **18** as a rotameric mixture of diastereomers, oil (7.13 g, 86%)

### Cross [2+2] of Enamide **1**

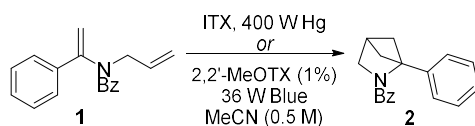

Scheme S16

**400 W Batch Irradiation:** Batch irradiation previously reported<sup>10</sup> when enamide **1** (105 g, 400 mmol) was irradiated in MeCN (0.4 M) with ITX (1.0 g, 4 mmol) with a 400 W Hg lamp in a 1 L Pyrex reactor for 24 hrs. The product **2** was isolated as a pale yellow solid (93.4 g, 89%)

**36 W Blue COB Irradiation:** The general 36 W COB reactor procedure was followed by irradiating enamide **1** (7.90 g, 30 mmol) in degassed MeCN (0.5 M) with 2,2'-MeOTX (82 mg, 0.3 mmol) in a 100 ml flask for 3 hrs. The reaction mixture was concentrated *in vacuo* and triturated with hexane and filtered, washing with cold Et<sub>2</sub>O to give **2** as a pale yellow solid (6.58 g, 83%)

### Cross [2+2] of Enamide **19**

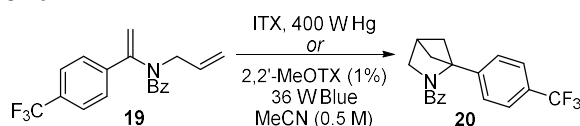

Scheme S17

**400 W Batch Irradiation:** Batch irradiation previously reported<sup>11</sup> when enamide **19** (265 g, 800 mmol) was irradiated in MeCN (0.4 M) with ITX (2.0 g, 8 mmol) with a 400 W Hg lamp in a 2 L Pyrex reactor for 35 hrs. The product **20** was isolated as a pale yellow solid (249 g, 94%)

**36 W Blue COB Irradiation:** The general 36 W COB reactor procedure was followed by irradiating enamide **19** (9.94 g, 30 mmol) in degassed MeCN (0.5 M) with 2,2'-MeOTX (82 mg, 0.3 mmol) in a 100 ml flask for 1.5 hrs. The reaction mixture was concentrated *in vacuo* and triturated with hexane and filtered, washing with cold Et<sub>2</sub>O to give **20** as a pale yellow solid (9.05 g, 91%)

### Cross [2+2] of Enamide **21**

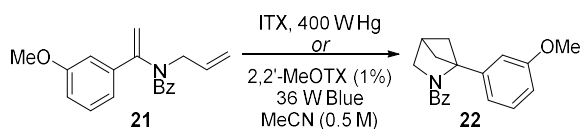

Scheme S18

**400 W Batch Irradiation:** Batch irradiation previously reported<sup>11</sup> when enamide **21** (117 g, 400 mmol) was irradiated in MeCN (0.2 M) with ITX (1.0 g, 4 mmol) with a 400 W Hg lamp in a 2 L Pyrex reactor for 29 hrs. The product **22** was isolated as a pale yellow solid (102 g, 87%)

**36 W Blue COB Irradiation:** The general 36 W COB reactor procedure was followed by irradiating enamide **21** (8.80 g, 30 mmol) in degassed MeCN (0.5 M) with 2,2'-MeOTX (82 mg, 0.3 mmol) in a 100 ml flask for 3.5 hrs. The reaction mixture was concentrated *in vacuo* and triturated with hexane and filtered, washing with cold Et<sub>2</sub>O to give **22** as a pale yellow solid (7.78 g, 88%)

## Cross [2+2] of Enamide **23**

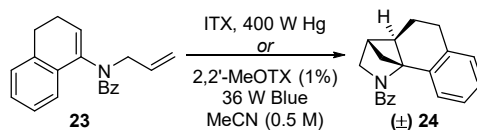

Scheme S19

**400 W Batch Irradiation:** The general immersion well batch procedure was followed using a 400 W Hg lamp and 1 L Pyrex reactor to irradiate enamide **23** (57.9 g, 200 mmol) in degassed MeCN (0.2 M) with ITX (1.0 g, 4 mmol). After 20 hrs the reaction mixture was concentrated *in vacuo* and triturated with hexane and filtered, washing with cold Et<sub>2</sub>O to give **24** as a beige powder (39.5 g, 68%): m.p. 138–139°C;  $\delta_{\text{H}}$  (500 MHz, DMSO-*d*<sub>6</sub>, 80°C) 7.58 – 7.52 (2H, m, Ar.H), 7.44 – 7.32 (3H, m, Ar.H), 7.12 – 6.92 (4H, m, Ar.H), 3.90 (1H, d, *J* = 8.0 Hz, NCHH), 3.38 (1H, d, *J* = 8.0 Hz, NCHH), 2.85 – 2.73 (2H, m, CH<sub>2</sub>), 2.70 (1H, s, CH), 2.42 – 2.37 (1H, m, CHH), 2.19 – 1.96 (4H, m, CH<sub>2</sub>, CH, CHH);  $\delta_{\text{C}}$  (126 MHz, DMSO-*d*<sub>6</sub>, 80°C) 171.3 (C), 136.4 (C), 135.7 (C), 135.0 (C), 129.9 (CH), 128.0 (CH), 127.6 (2×CH), 127.4 (2×CH), 125.6 (CH), 125.1 (CH), 125.0 (CH), 71.1 (C), 56.7 (CH<sub>2</sub>), 49.8 (CH), 45.8 (CH<sub>2</sub>), 36.6 (CH), 28.7 (CH<sub>2</sub>), 23.2 (CH<sub>2</sub>); ESI-HRMS *m/z* 290.1544 (MH<sup>+</sup> C<sub>20</sub>H<sub>20</sub>NO requires 290.1539)

**36 W Blue COB Irradiation:** The general 36 W COB reactor procedure was followed by irradiating enamide **23** (8.68 g, 30 mmol) in degassed MeCN (0.5 M) with 2,2'-MeOTX (82 mg, 0.3 mmol) in a 100 ml flask for 6 hrs. The reaction mixture was concentrated *in vacuo* and triturated with hexane and filtered, washing with cold Et<sub>2</sub>O to give **24** as a beige solid (5.87 g, 68%)

## Cross [2+2] of Amino Cinnamate **25**

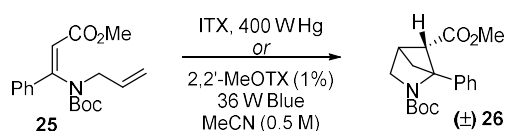

Scheme S20

**400 W Batch Irradiation:** The general immersion well batch procedure was followed using a 400 W Hg lamp and 400 ml Pyrex reactor to irradiate amino cinnamate **25** (12.7 g, 40 mmol) in degassed MeCN (0.1 M) with ITX (0.5 g, 2 mmol). After 3.5 hrs the reaction mixture was concentrated *in vacuo* and triturated with hexane and filtered, washing with petrol to give **26** as a pale yellow solid (9.2 g, 72%)

**36 W Blue COB Irradiation:** The general 36 W COB reactor procedure was followed by irradiating amino cinnamate **25** (9.52 g, 30 mmol) in degassed MeCN (0.5 M) with 2,2'-MeOTX (82 mg, 0.3 mmol) in a 100 ml flask for 3.75 hrs. The reaction mixture was concentrated *in vacuo* and triturated with hexane and filtered, washing with petrol to give **26** as a white solid (7.98 g, 84%): m.p. 73–74°C;  $\delta_{\text{H}}$  (400 MHz, CDCl<sub>3</sub>) 7.45 – 7.21 (5H, m, Ar.H), 3.92 (1H, d, *J* = 8.9 Hz, NCHH), 3.70 (3H, s, OCH<sub>3</sub>), 3.56 (1H, d, *J* = 8.9 Hz, NCHH), 3.08 – 3.02 (2H, m, CH, CH), 1.92 – 1.84 (2H, m, CH<sub>2</sub>), 1.07 (9H, s, 3×CH<sub>3</sub>);  $\delta_{\text{C}}$  (101 MHz, CDCl<sub>3</sub>) 169.7 (C), 157.1 (C), 138.5 (C), 127.9 (2×CH), 127.3 (CH), 126.8 (2×CH), 79.1 (C), 76.5 (C), 51.7 (CH<sub>3</sub>), 51.0 (CH), 50.9 (CH<sub>2</sub>), 45.3 (CH<sub>2</sub>), 38.0 (CH), 28.0 (3×CH<sub>3</sub>); ESI-HRMS *m/z* 318.1693 (MH<sup>+</sup> C<sub>18</sub>H<sub>24</sub>NO<sub>4</sub> requires 318.1700)

## Intramolecular [2+2] of Alkoxy-maleimide **27**

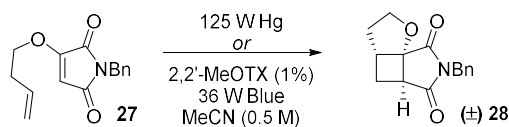

Scheme S21

**125 W Batch Irradiation:** The general immersion well batch procedure was followed using a 125 W Hg lamp and 150 ml Pyrex reactor to irradiate alkoxy-maleimide **27** (3.86 g, 15 mmol) in degassed MeCN (0.1 M). After 1.5 hrs the reaction mixture was concentrated *in vacuo* and chromatography on silica (5% Et<sub>2</sub>O in DCM) yielded product **28** as a white solid (3.57 g, 92%)

**36 W Blue COB Irradiation:** The general 36 W COB reactor procedure was followed by irradiating alkoxy-maleimide **27** (2.57 g, 10 mmol) in degassed MeCN (0.1 M) with 2,2'-MeOTX (136 mg, 0.5 mmol) in a 250 ml flask for 1.5 hrs. The reaction mixture was concentrated *in vacuo* and triturated with hexane and filtered, washing with cold Et<sub>2</sub>O to give **28** as a pale yellow solid (2.38 g, 93%): m.p. 127-129°C;  $\delta_{\text{H}}$  (400 MHz, CDCl<sub>3</sub>) 7.40 – 7.25 (5H, m, Ar.H), 4.75 (1H, d,  $J = 14.1$  Hz, NCHHPh), 4.71 (1H, d,  $J = 14.1$  Hz, NCHHPh), 4.45 (1H, ddd,  $J = 9.3, 7.7, 1.8$  Hz, OCHH), 4.09 (1H, ddd,  $J = 10.7, 9.3, 5.7$  Hz, OCHH), 3.15 – 3.08 (1H, m, CH), 3.05 (1H, ddd,  $J = 10.4, 4.3, 1.1$  Hz, CH), 2.20 (1H, ddd,  $J = 13.7, 8.2, 4.2$  Hz, CHH), 2.15-2.06 (1H, m, CHH), 2.12 (1H, dd,  $J = 10.4, 5.7$  Hz, CHH), 1.87 (1H, ddt,  $J = 12.8, 5.7, 1.7$  Hz, CHH);  $\delta_{\text{C}}$  (101 MHz, CDCl<sub>3</sub>) 176.4 (C), 175.3 (C), 135.7 (C), 128.8 (2×CH), 128.7 (2×CH), 128.1 (CH), 84.6 (C), 71.0 (CH<sub>2</sub>), 42.6 (CH<sub>2</sub>), 42.6 (CH), 41.9 (CH), 31.9 (CH<sub>2</sub>), 25.0 (CH<sub>2</sub>)

## Cookson's Dione [2+2]

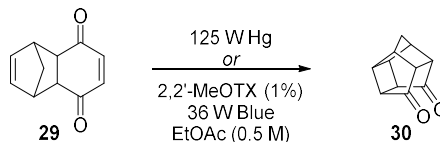

Scheme S22

**125 W Batch Irradiation:** Batch irradiation previously reported when Diels Alder adduct **29** (2.61 g, 15 mmol) was irradiated in EtOAc (0.1 M) with a 125 W Hg lamp in a 150 ml Pyrex reactor for 15 min. The product **30** was isolated as an off-white solid (2.38 g, 91%)

**36 W Blue COB Irradiation:** The general 36 W COB reactor procedure was followed by irradiating Diels Alder adduct **29** (2.61 g, 15 mmol) in degassed EtOAc (0.5 M) with 2,2'-MeOTX (41 mg, 0.15 mmol) in a 50 ml flask for 25 min. The reaction mixture was concentrated *in vacuo* and triturated with hexane and filtered, washing with cold Et<sub>2</sub>O to give **30** as a pale yellow solid (2.41 g, 92%)

### Comparison with non-Sensitized Reaction

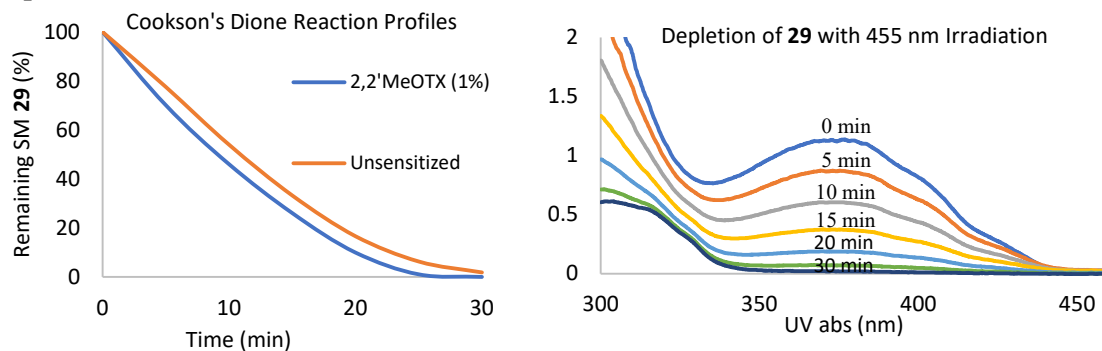

**Figure S13:** *left-* Depletion of **29** over time with, and without 2,2'-MeOTX (36 W blue COB); *Right-* UV absorption of **29** over time with irradiation at 455 nm showing depletion of peak at 374 nm

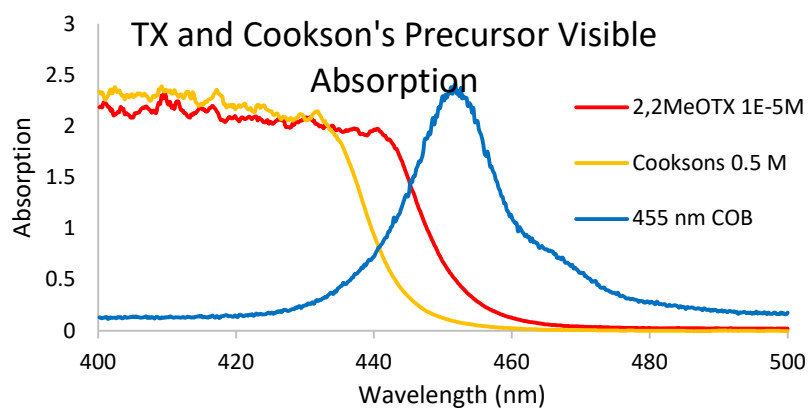

**Figure S14:** Comparison of vis light absorption of enedione **29** and 2,2'-MeOTX



## X-Ray Data for 24 and 26

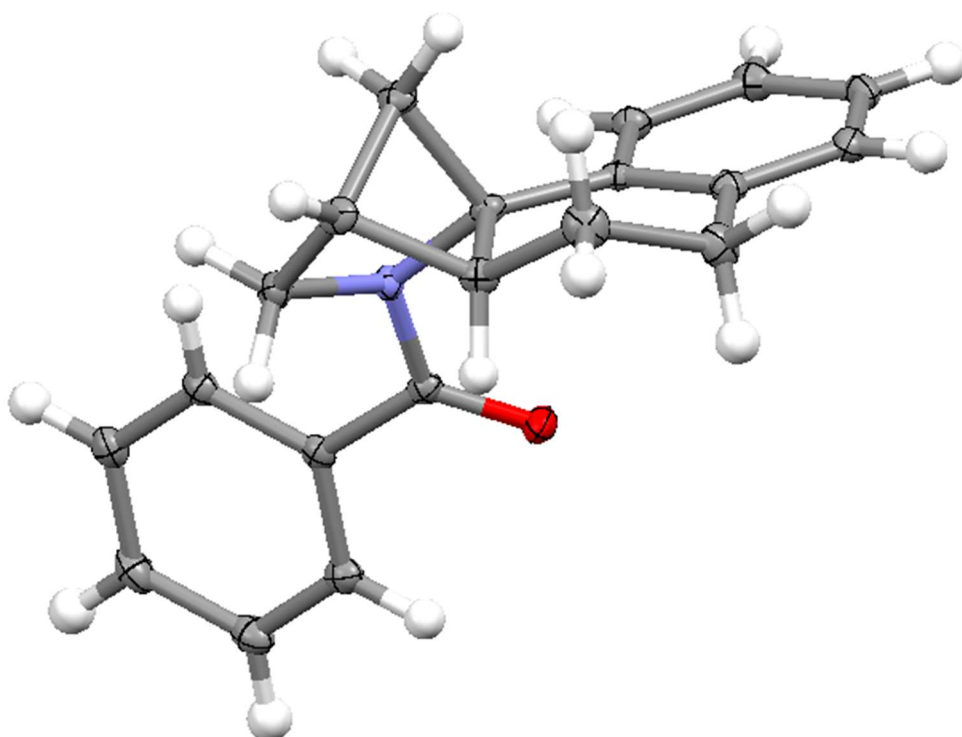

**Figure S15:** X-Ray structure of compound **24**. Ellipsoids shown at 30% probability

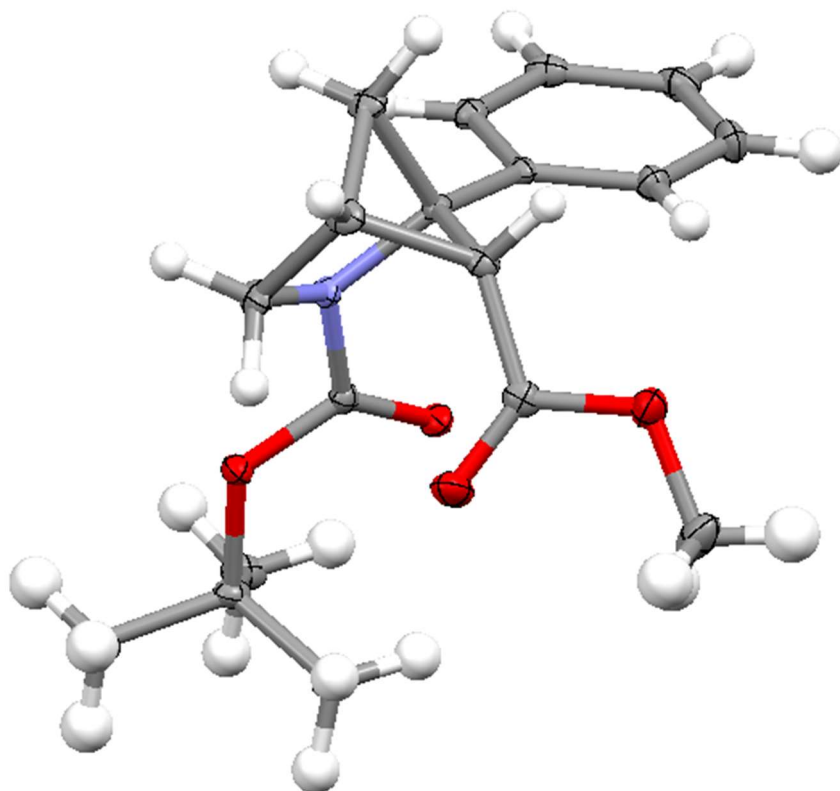

**Figure S16:** X-Ray structure of compound **26**. Ellipsoids shown at 30% probability

### Crystallography

X-ray diffraction experiments on **24** and **26** were carried out at 100(2) K on a Bruker APEX II diffractometer with CCD using Mo-K $\alpha$  radiation ( $\lambda = 0.71073$  Å). Intensities were integrated in SAINT<sup>12</sup> and absorption corrections based on equivalent reflections were applied using SADABS.<sup>13</sup> Both structures were solved using ShelXT<sup>14</sup> and refined by full matrix least squares against  $F^2$  in ShelXL<sup>15,16</sup> using Olex2<sup>17</sup>. All of the non-hydrogen atoms were refined anisotropically. While all of the hydrogen atoms were located geometrically and refined using a riding model. Crystal structure and refinement data are given in Table S37. Crystallographic data for compounds **24** and **26** have been deposited with the Cambridge Crystallographic Data Centre as supplementary publication CCDC 1989743-1989744. Copies of the data can be obtained free of charge on application to CCDC, 12 Union Road, Cambridge CB2 1EZ, UK [fax(+44) 1223 336033, e-mail: [deposit@ccdc.cam.ac.uk](mailto:deposit@ccdc.cam.ac.uk)].

|                                                              |                                                                    |                                                                    |
|--------------------------------------------------------------|--------------------------------------------------------------------|--------------------------------------------------------------------|
| Identification code                                          | <b>24</b>                                                          | <b>26</b>                                                          |
| Empirical formula                                            | C <sub>20</sub> H <sub>19</sub> NO                                 | C <sub>18</sub> H <sub>23</sub> NO <sub>4</sub>                    |
| Formula weight                                               | 289.36                                                             | 317.37                                                             |
| Temperature/K                                                | 100(2)                                                             | 100(2)                                                             |
| Crystal system                                               | monoclinic                                                         | monoclinic                                                         |
| Space group                                                  | <i>P</i> 2 <sub>1</sub> / <i>c</i>                                 | <i>P</i> 2 <sub>1</sub> / <i>n</i>                                 |
| <i>a</i> /Å                                                  | 18.0122(7)                                                         | 12.9756(6)                                                         |
| <i>b</i> /Å                                                  | 7.3245(2)                                                          | 7.5343(3)                                                          |
| <i>c</i> /Å                                                  | 11.5355(4)                                                         | 17.9068(8)                                                         |
| $\alpha$ /°                                                  | 90                                                                 | 90                                                                 |
| $\beta$ /°                                                   | 97.158(2)                                                          | 100.916(3)                                                         |
| $\gamma$ /°                                                  | 90                                                                 | 90                                                                 |
| Volume/Å <sup>3</sup>                                        | 1510.02(9)                                                         | 1718.93(13)                                                        |
| <i>Z</i>                                                     | 4                                                                  | 4                                                                  |
| $\rho_{\text{calc}}$ /cm <sup>3</sup>                        | 1.273                                                              | 1.226                                                              |
| $\mu$ /mm <sup>-1</sup>                                      | 0.078                                                              | 0.086                                                              |
| <i>F</i> (000)                                               | 616.0                                                              | 680.0                                                              |
| Crystal size/mm <sup>3</sup>                                 | 0.456 × 0.198 × 0.14                                               | 0.495 × 0.405 × 0.373                                              |
| Radiation                                                    | MoK $\alpha$ ( $\lambda$ = 0.71073)                                | MoK $\alpha$ ( $\lambda$ = 0.71073)                                |
| 2 $\theta$ range for data collection/°                       | 4.558 to 50.694                                                    | 3.574 to 55.886                                                    |
| Index ranges                                                 | -21 ≤ <i>h</i> ≤ 21,<br>-8 ≤ <i>k</i> ≤ 8,<br>-13 ≤ <i>l</i> ≤ 13  | -16 ≤ <i>h</i> ≤ 17,<br>-9 ≤ <i>k</i> ≤ 9,<br>-23 ≤ <i>l</i> ≤ 23  |
| Reflections collected                                        | 21808                                                              | 15326                                                              |
| <i>R</i> <sub>int</sub> / <i>R</i> <sub>sigma</sub>          | 0.0653 / 0.0358                                                    | 0.0340 / 0.0327                                                    |
| Data/restraints/parameters                                   | 2759/0/199                                                         | 4103/0/212                                                         |
| Goodness-of-fit on <i>F</i> <sup>2</sup>                     | 1.034                                                              | 1.035                                                              |
| Final <i>R</i> indexes [ <i>I</i> ≥ 2 $\sigma$ ( <i>I</i> )] | <i>R</i> <sub>1</sub> = 0.0400,<br><i>wR</i> <sub>2</sub> = 0.0933 | <i>R</i> <sub>1</sub> = 0.0400,<br><i>wR</i> <sub>2</sub> = 0.0950 |
| Final <i>R</i> indexes [all data]                            | <i>R</i> <sub>1</sub> = 0.0590,<br><i>wR</i> <sub>2</sub> = 0.1040 | <i>R</i> <sub>1</sub> = 0.0515,<br><i>wR</i> <sub>2</sub> = 0.1018 |
| Largest diff. peak/hole / e Å <sup>-3</sup>                  | 0.17/-0.21                                                         | 0.24/-0.24                                                         |

**Table S37:** Crystal data and structure refinement for **24** and **26**.

# Copies of $^1\text{H}$ and $^{13}\text{C}$ NMR Spectra

$^1\text{H}$ -NMR (400 MHz,  $\text{CDCl}_3$ )

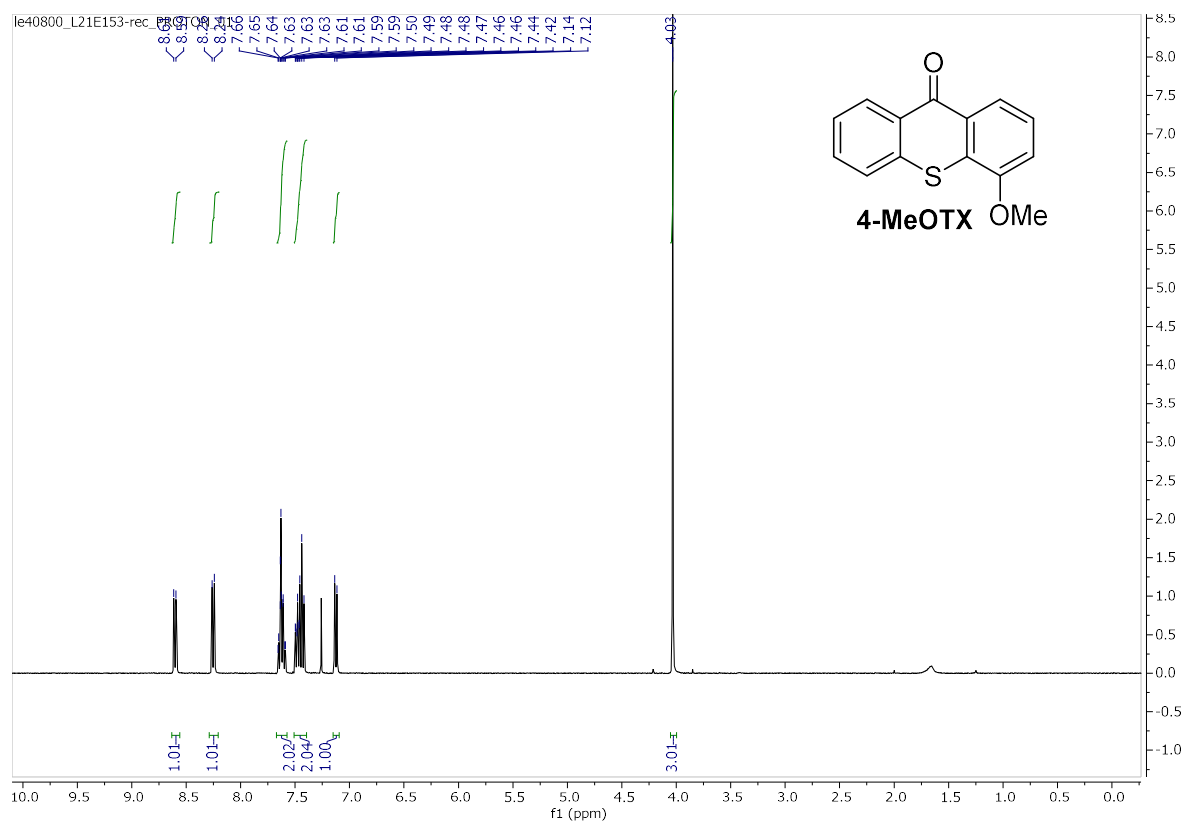

$^{13}\text{C}$ -NMR (101 MHz,  $\text{CDCl}_3$ )

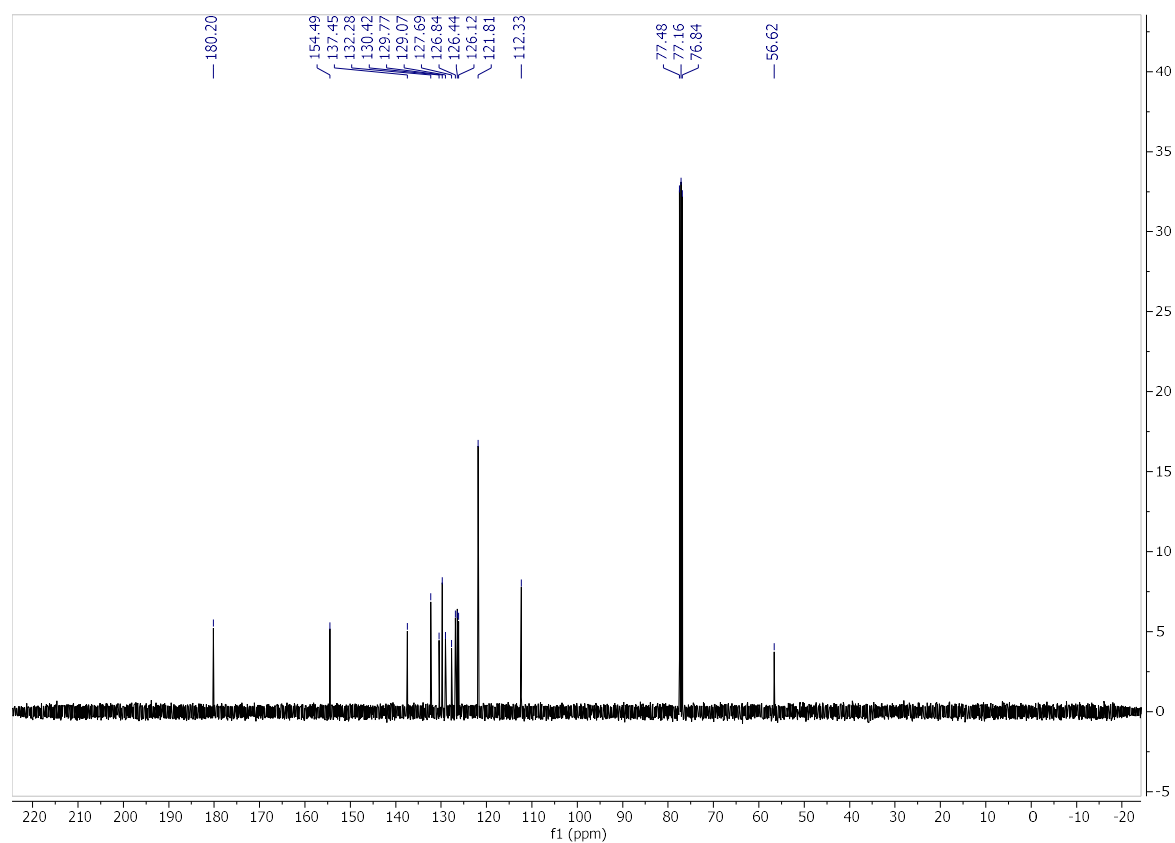

<sup>1</sup>H-NMR (400 MHz, CDCl<sub>3</sub>)

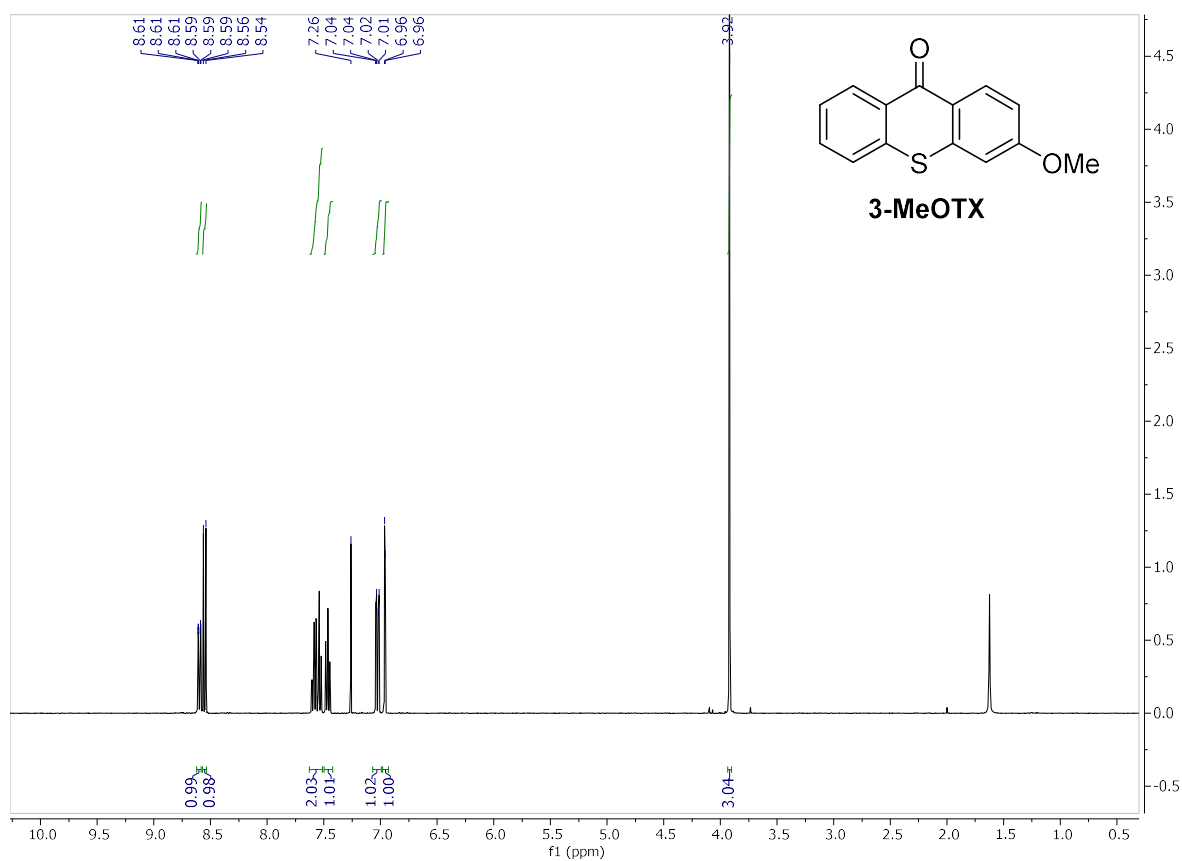

<sup>13</sup>C-NMR (101 MHz, CDCl<sub>3</sub>)

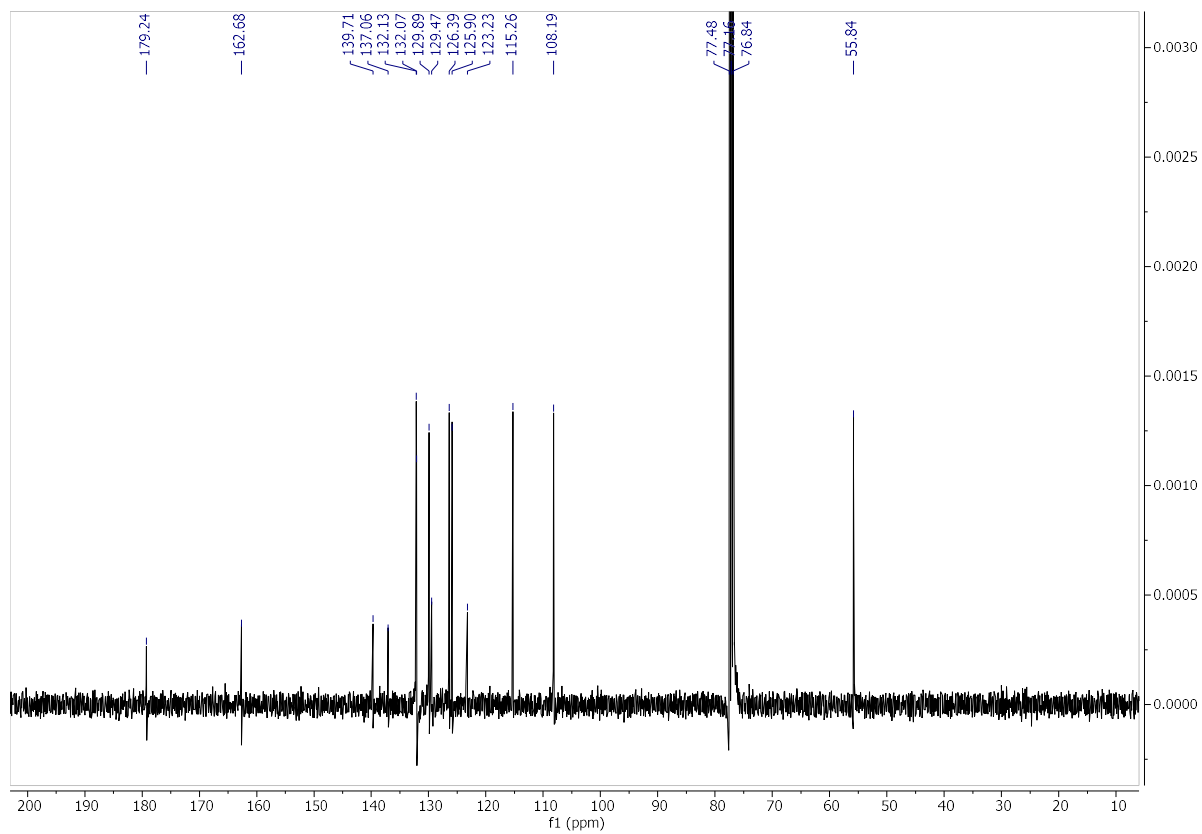

<sup>1</sup>H-NMR (400 MHz, CDCl<sub>3</sub>)

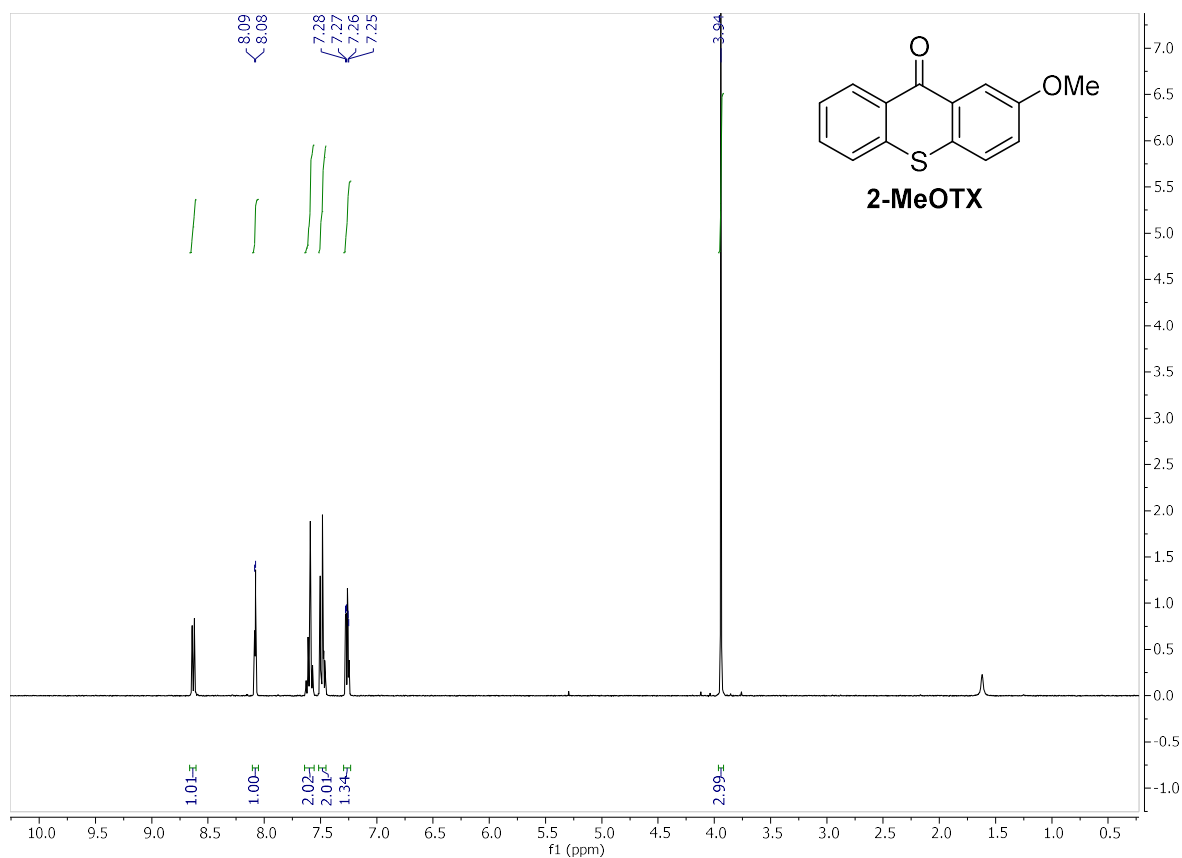

**<sup>13</sup>C-NMR (101 MHz, CDCl<sub>3</sub>)**

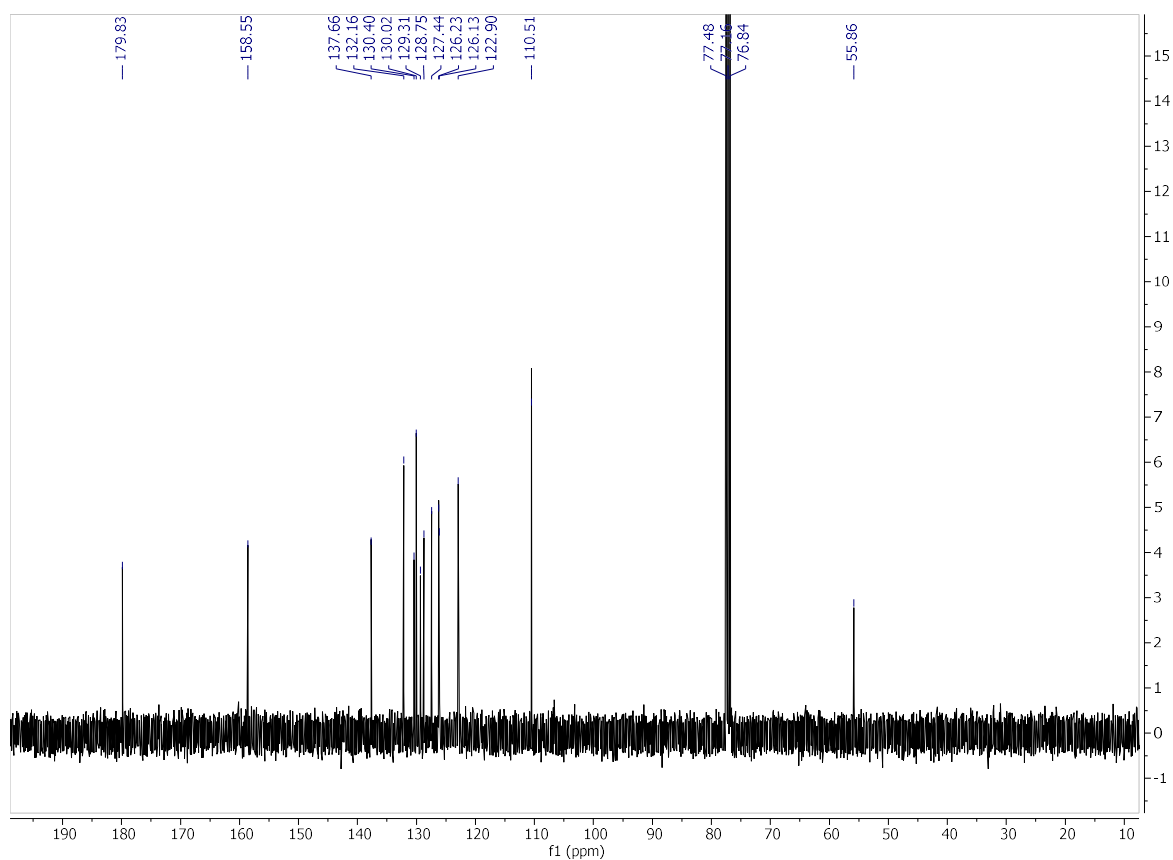

**<sup>1</sup>H-NMR (400 MHz, CDCl<sub>3</sub>)**

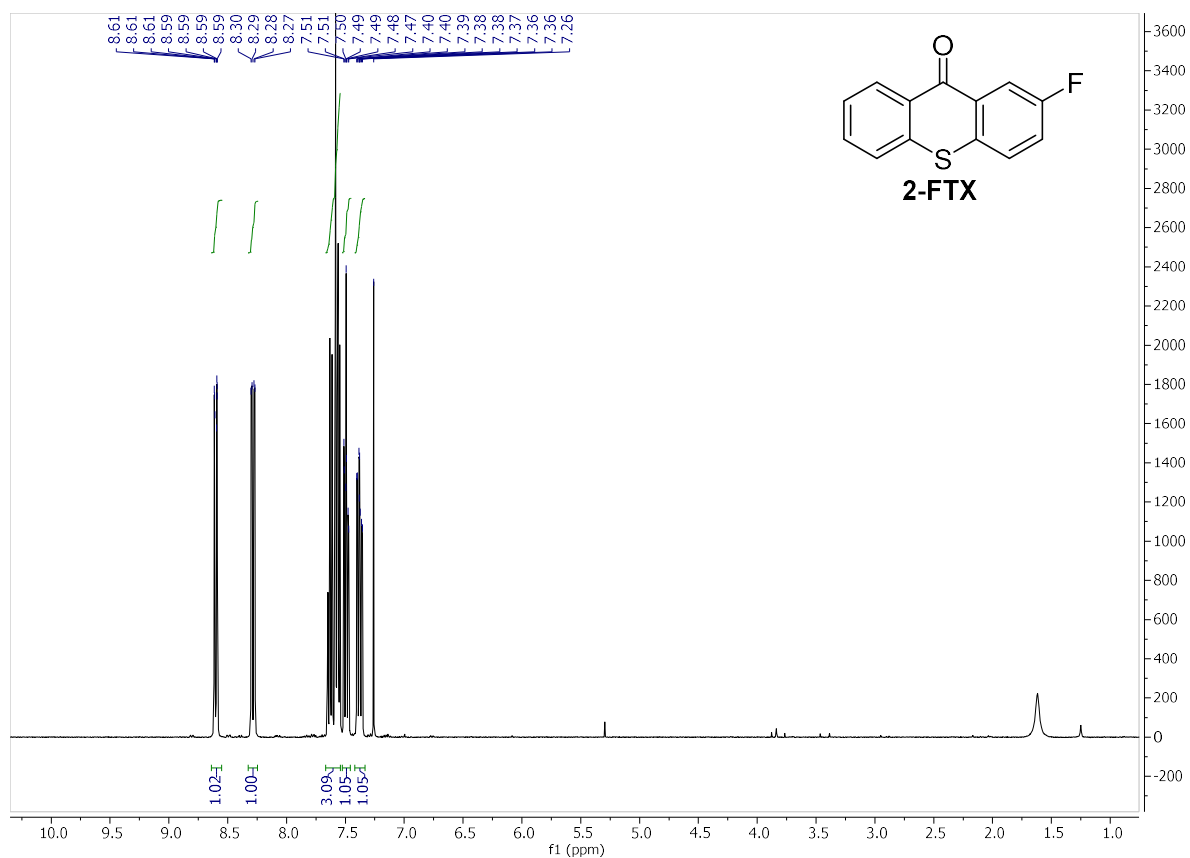

**<sup>13</sup>C-NMR (101 MHz, CDCl<sub>3</sub>)**

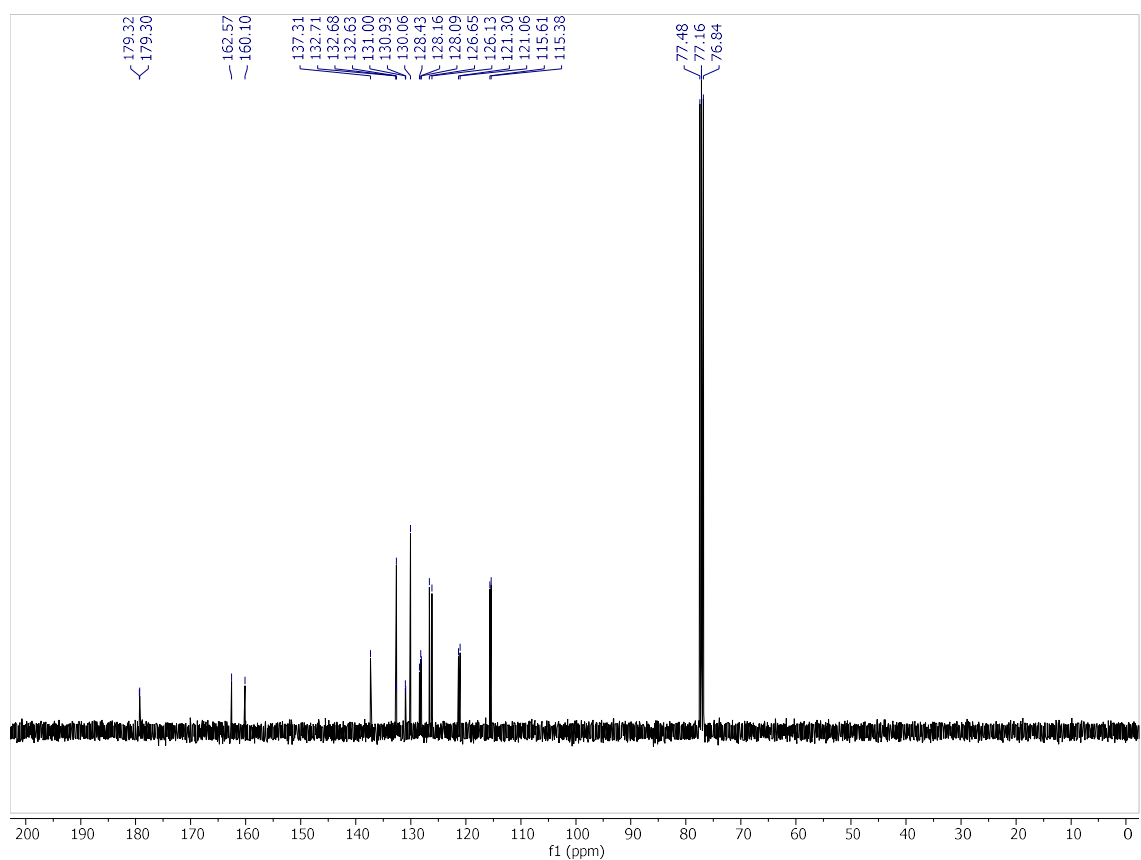

**<sup>1</sup>H-NMR (400 MHz, CDCl<sub>3</sub>)**

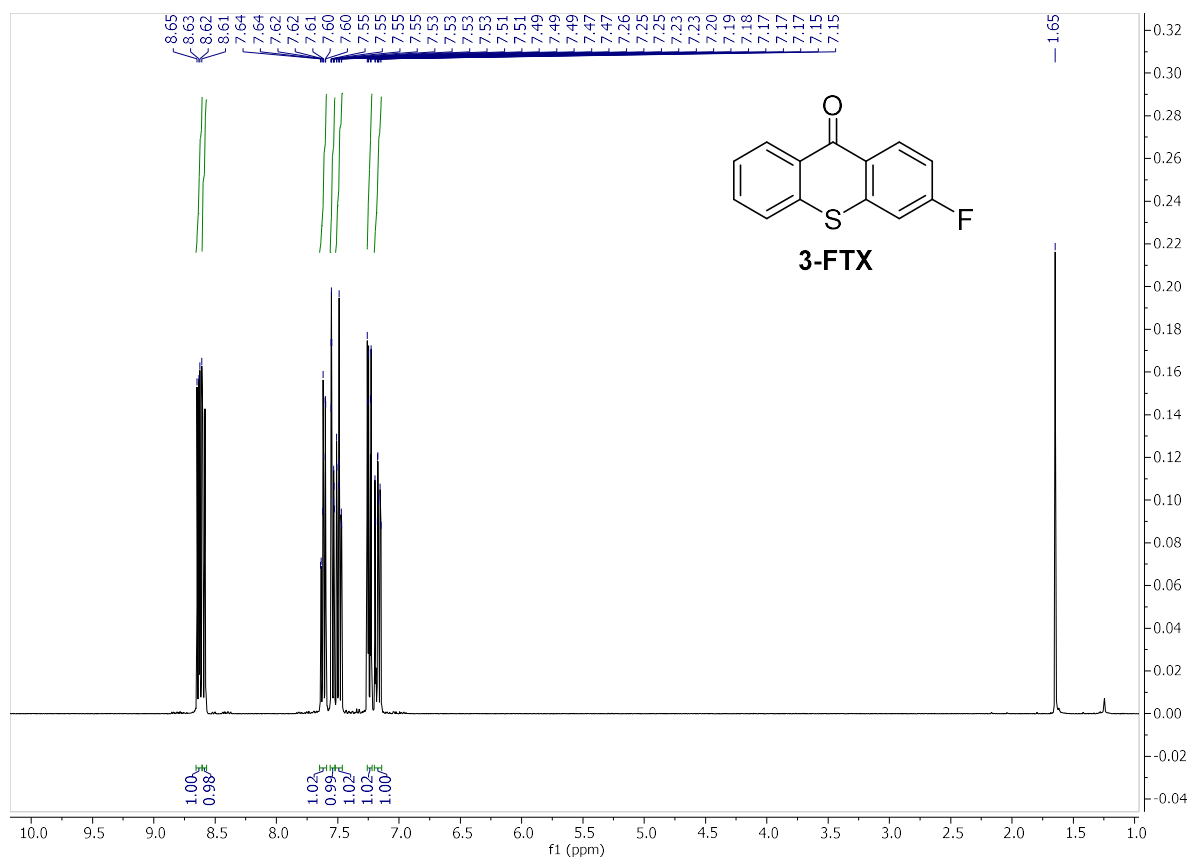

13C-NMR (101 MHz, CDCl<sub>3</sub>)

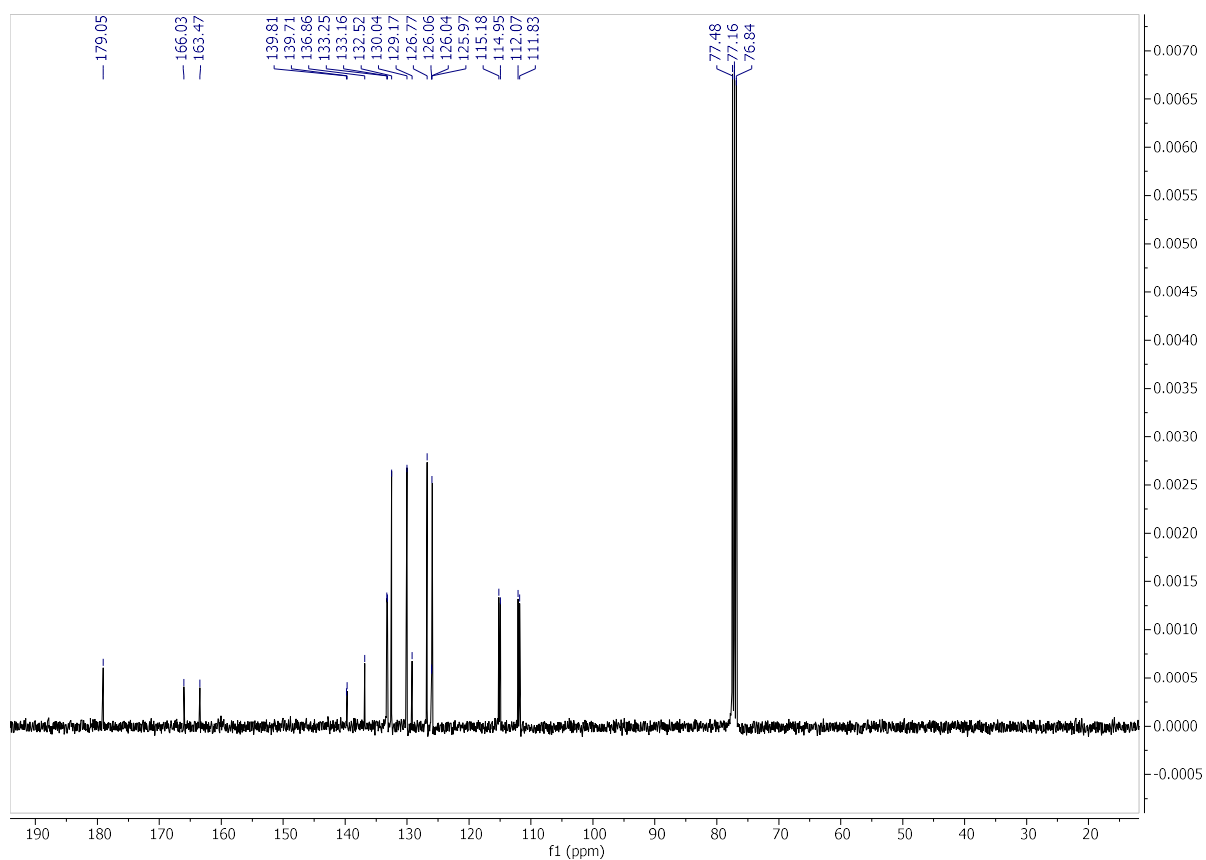

1H-NMR (400 MHz, CDCl<sub>3</sub>)



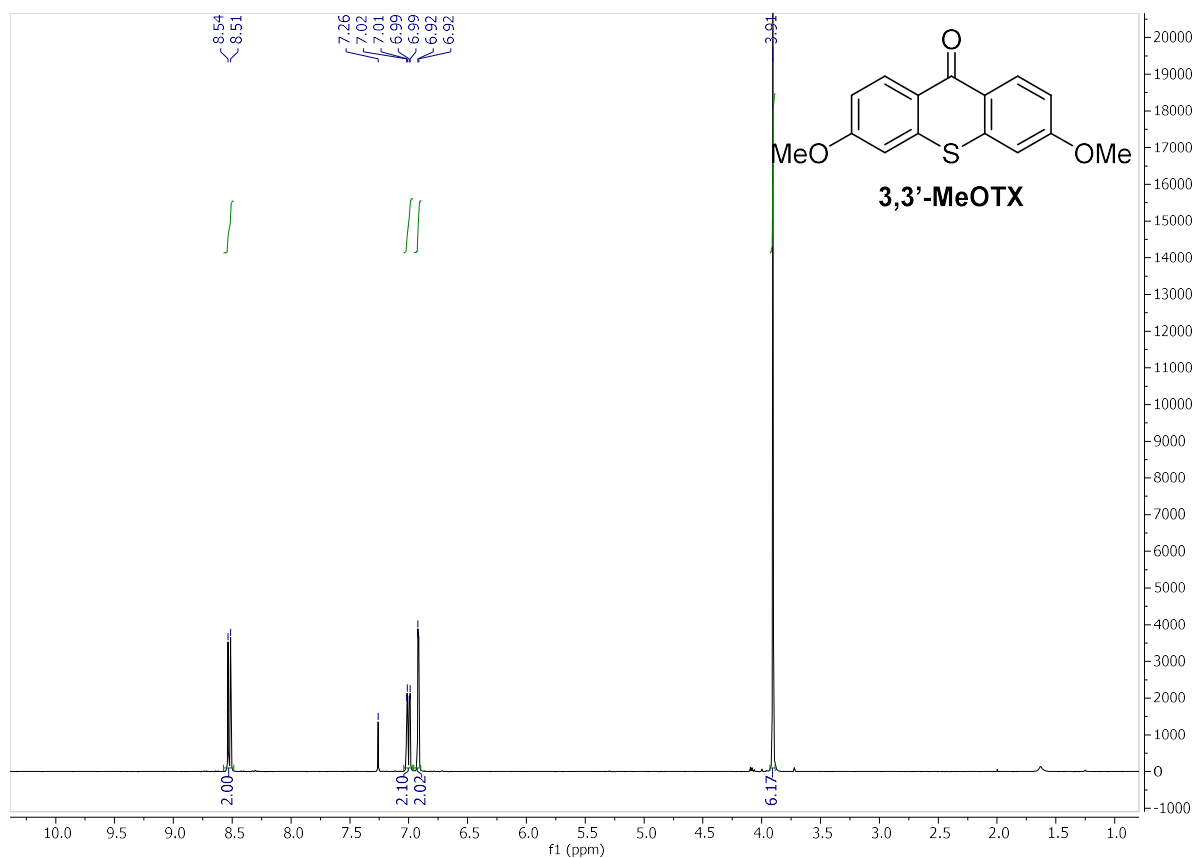

<sup>13</sup>C-NMR (101 MHz, CDCl<sub>3</sub>)

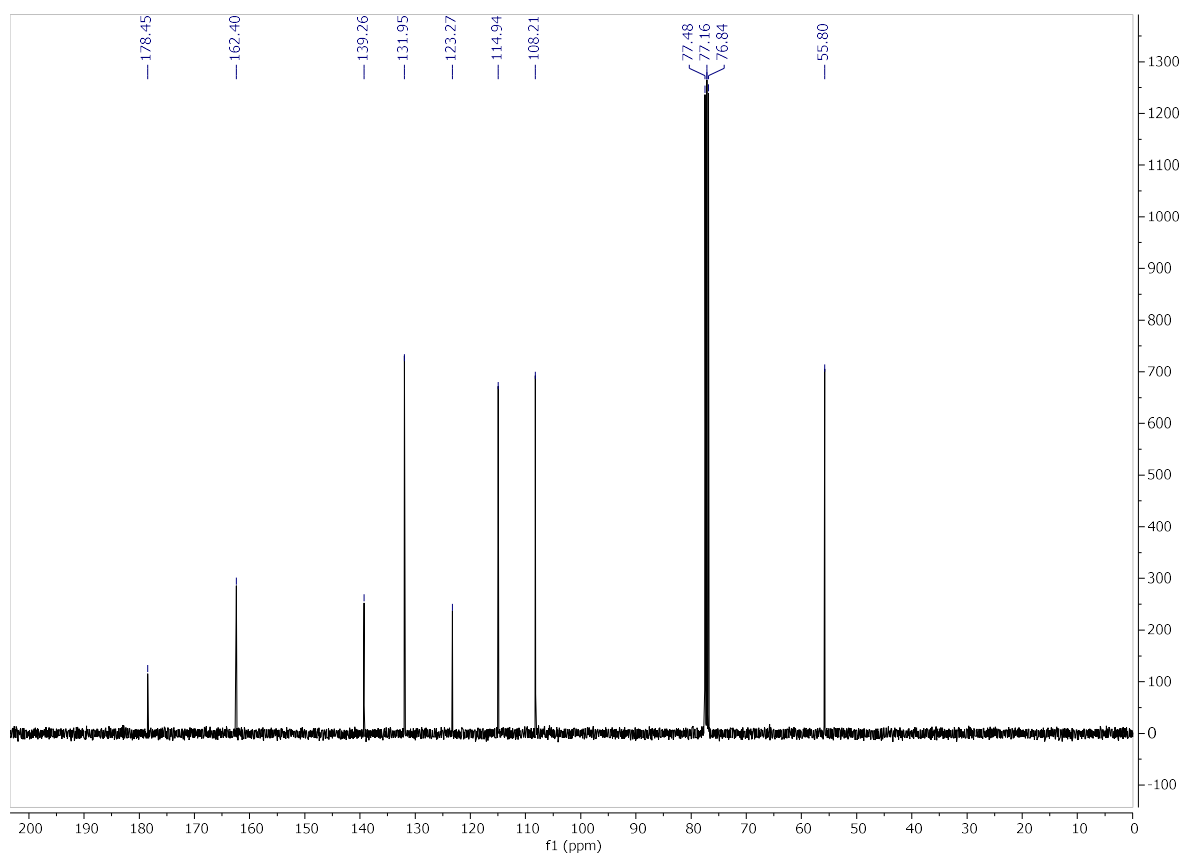

<sup>1</sup>H-NMR (400 MHz, CDCl<sub>3</sub>)

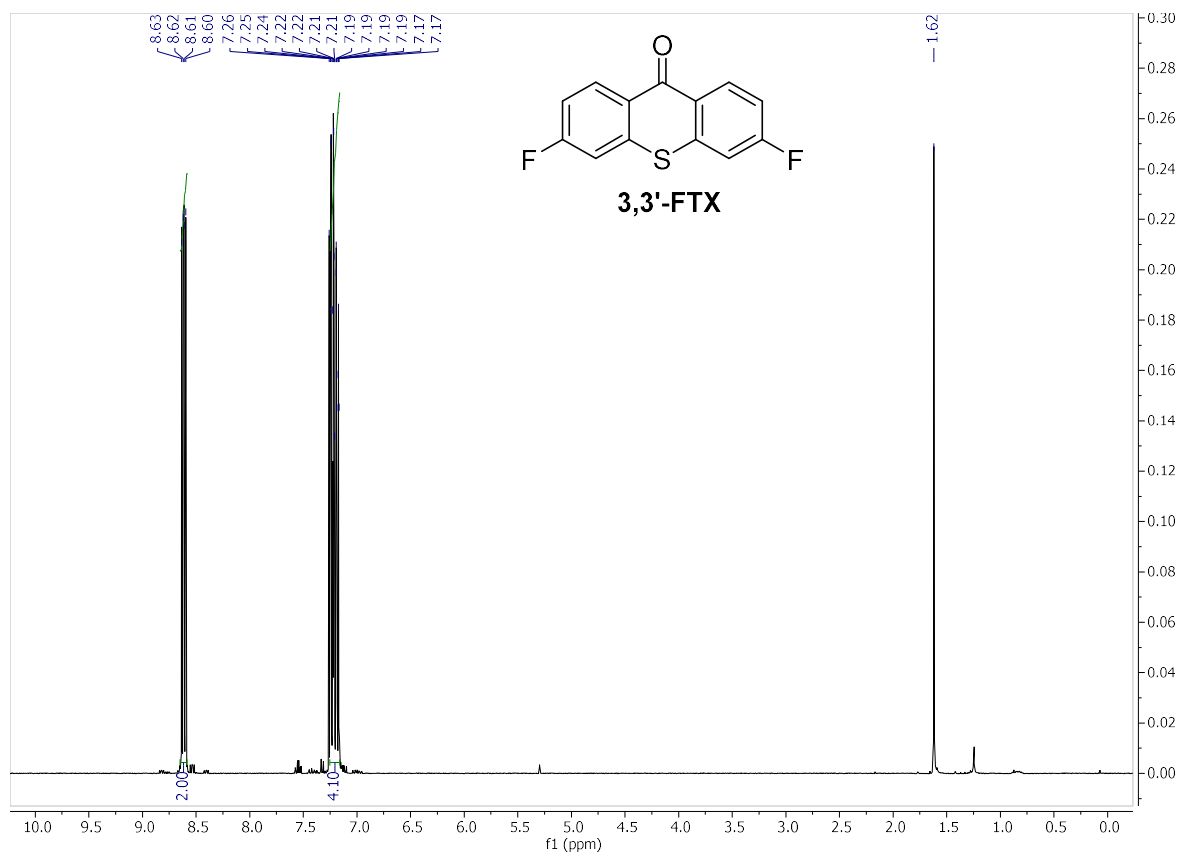

**13C-NMR (101 MHz, CDCl<sub>3</sub>)**

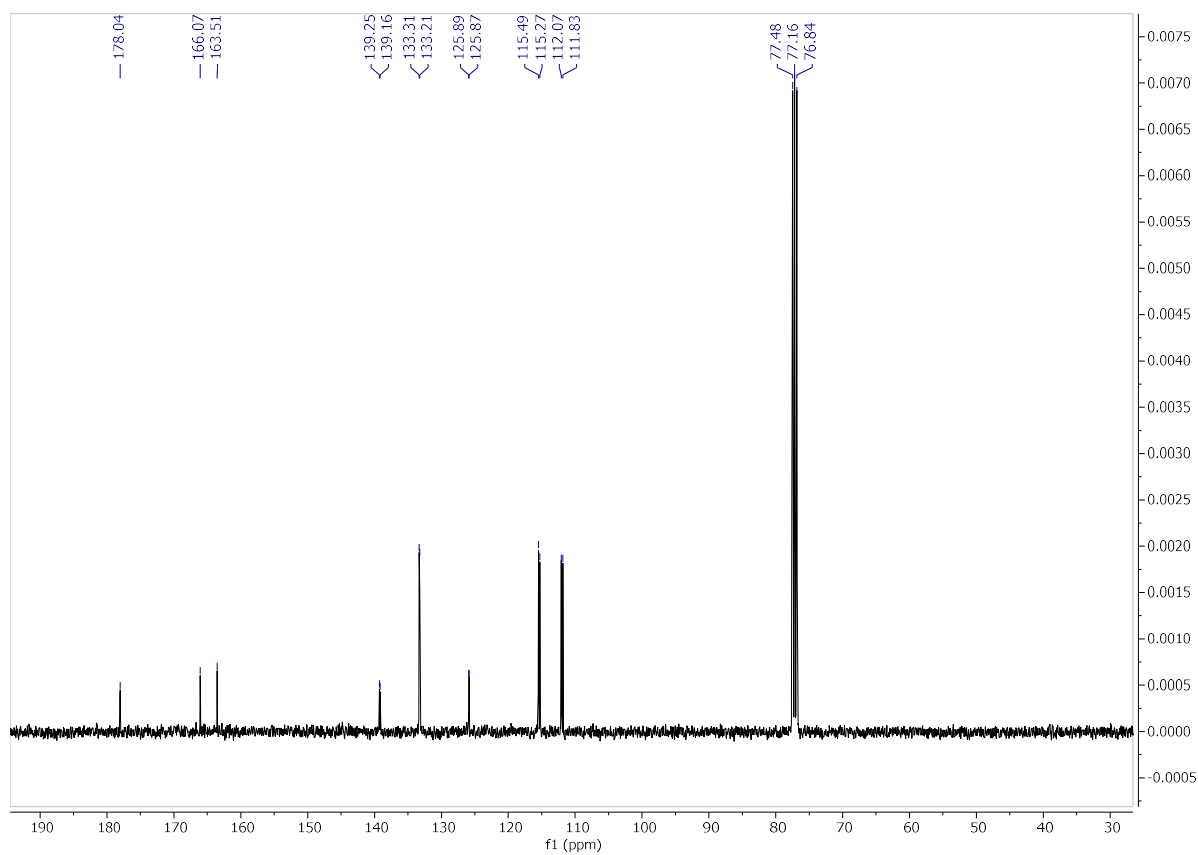

**1H-NMR (400 MHz, CDCl<sub>3</sub>)**

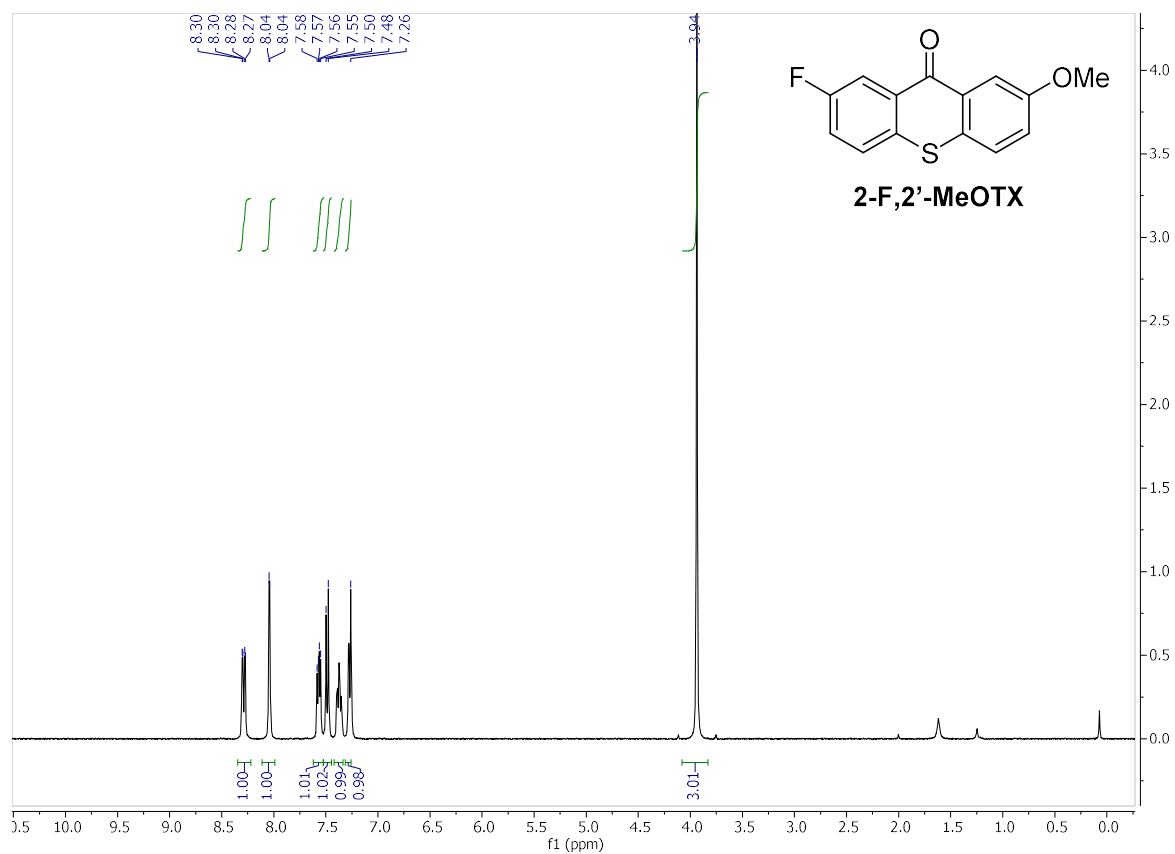

**<sup>13</sup>C-NMR (101 MHz, CDCl<sub>3</sub>)**

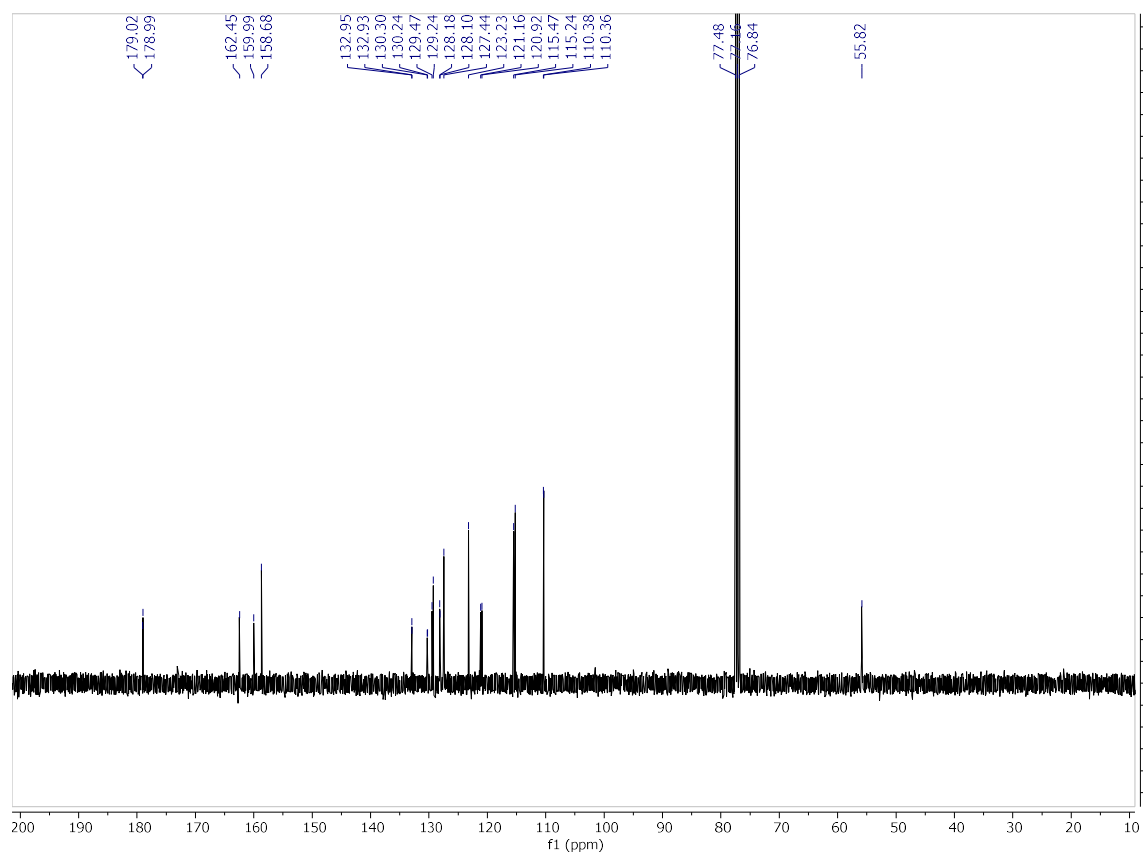

**<sup>1</sup>H-NMR (400 MHz, CDCl<sub>3</sub>)**

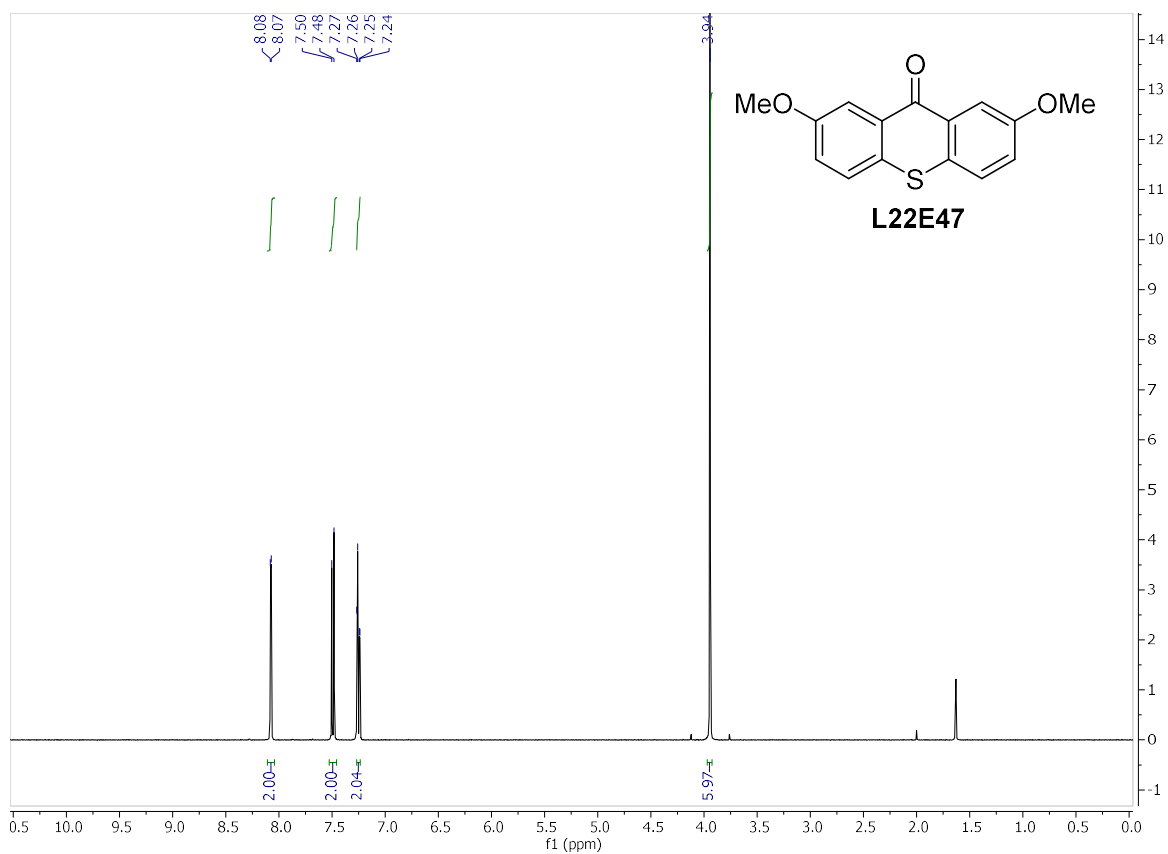

<sup>13</sup>C-NMR (101 MHz, CDCl<sub>3</sub>)

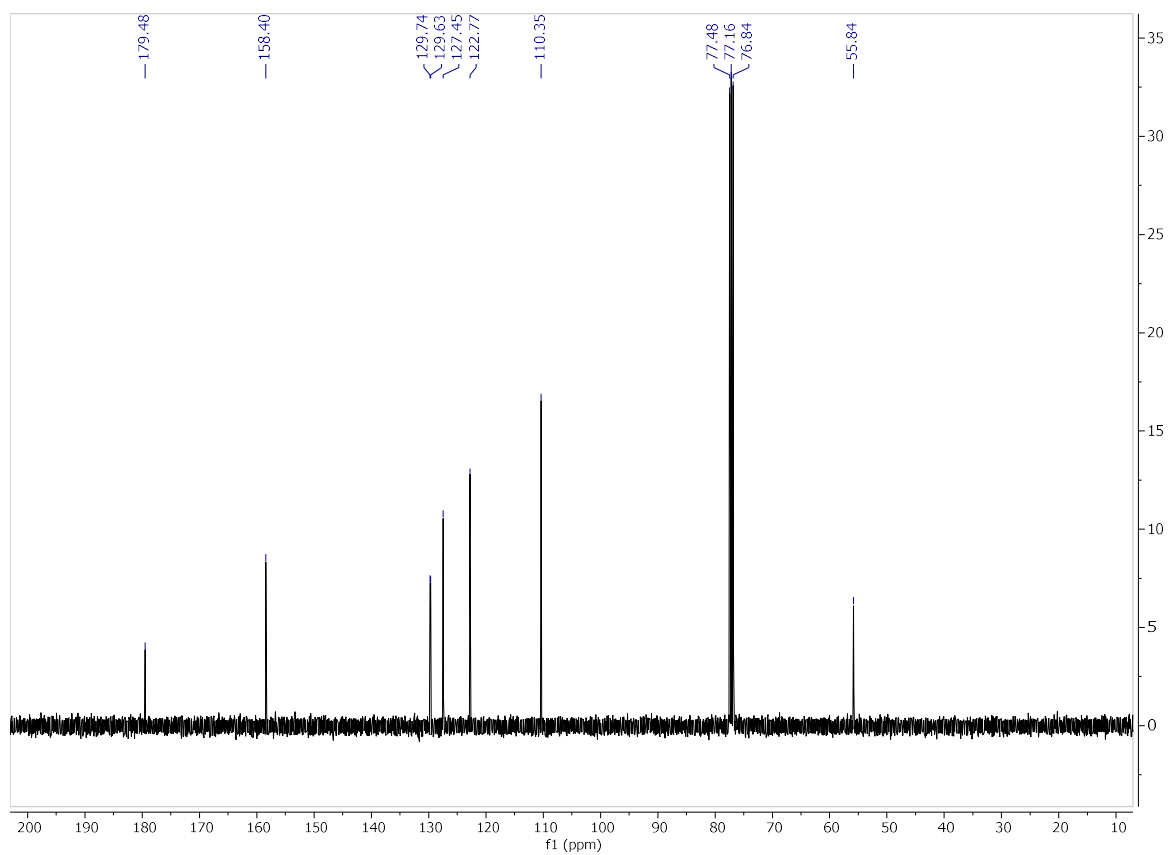

<sup>1</sup>H-NMR (400 MHz, CDCl<sub>3</sub>)

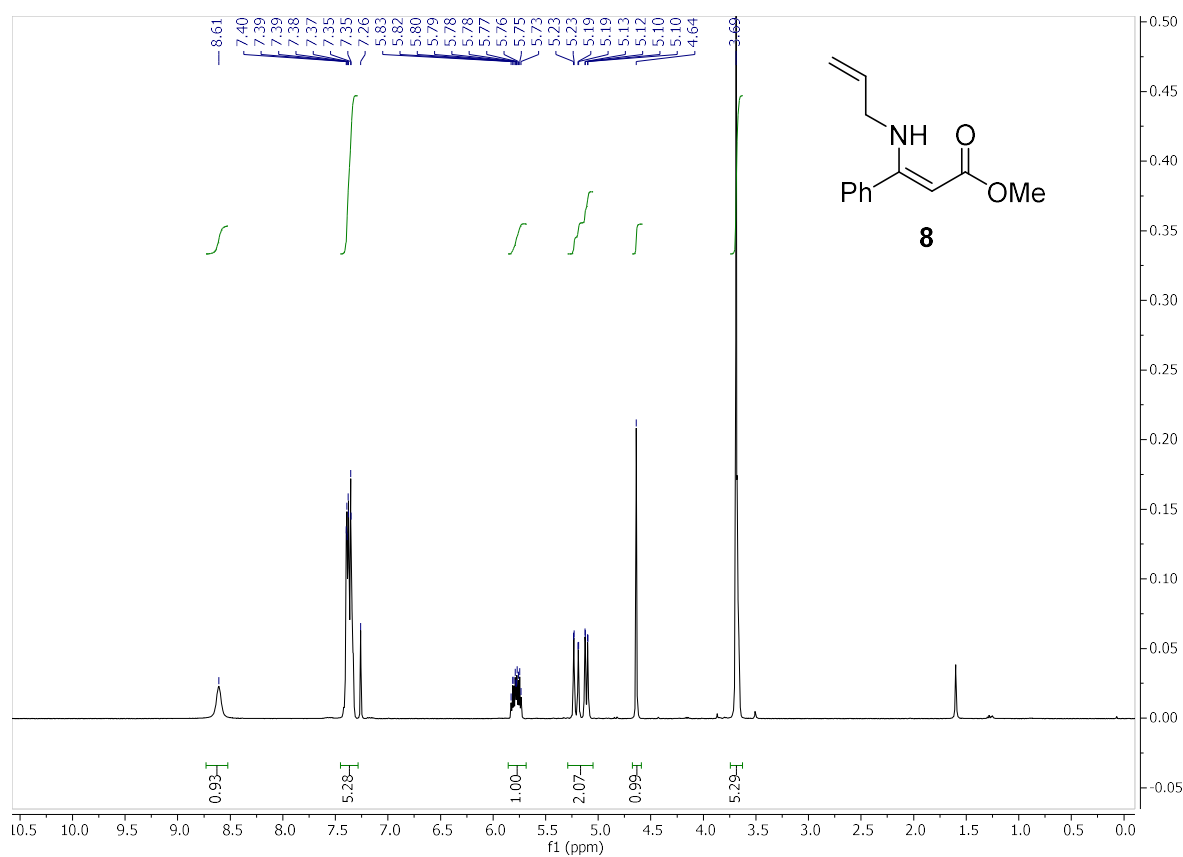

<sup>13</sup>C-NMR (101 MHz, CDCl<sub>3</sub>)

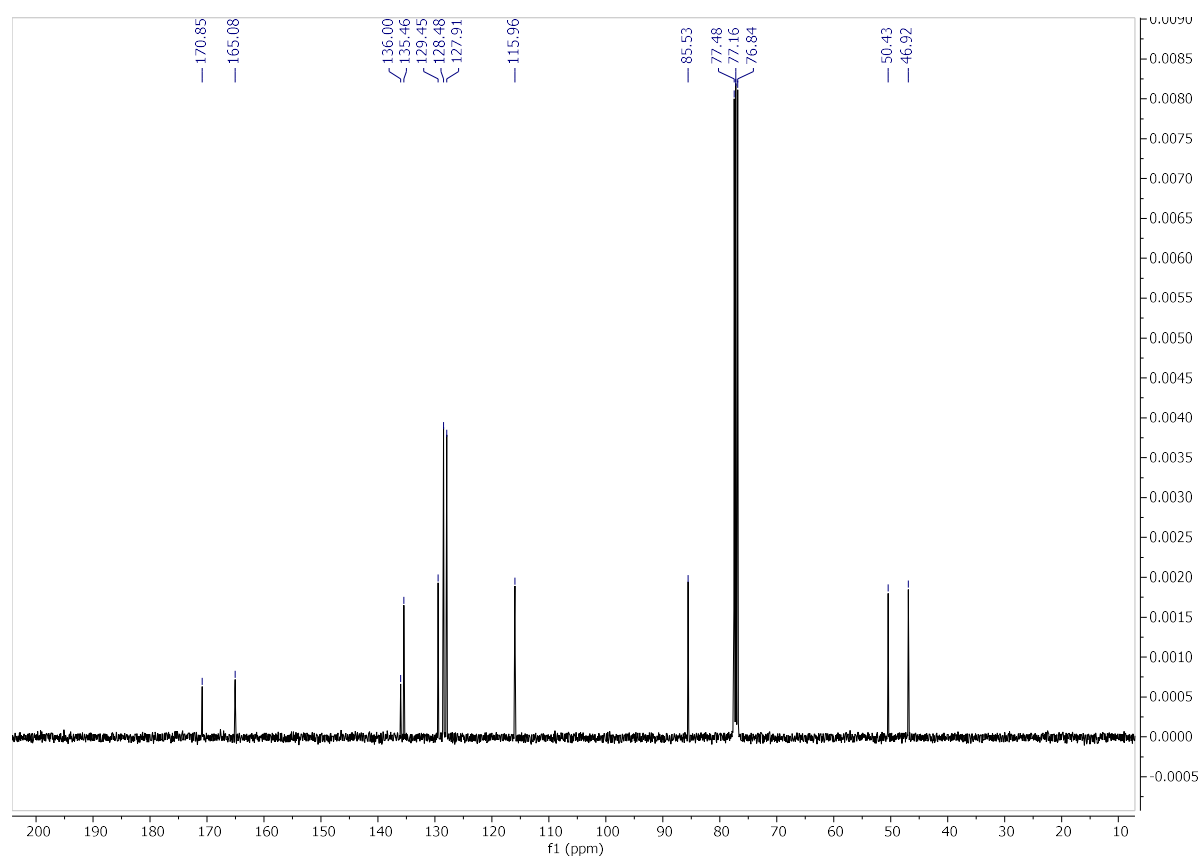

<sup>1</sup>H-NMR (400 MHz, CDCl<sub>3</sub>)

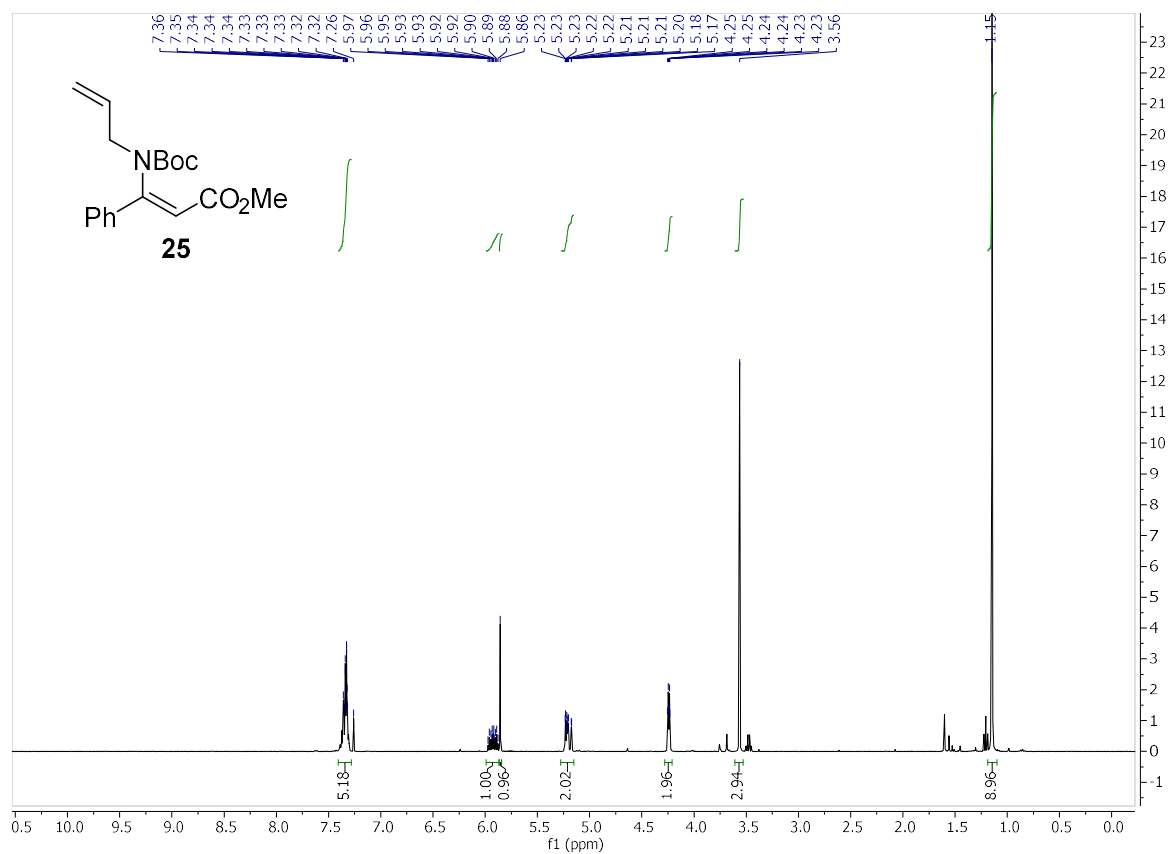

**13C-NMR** (101 MHz, CDCl<sub>3</sub>)

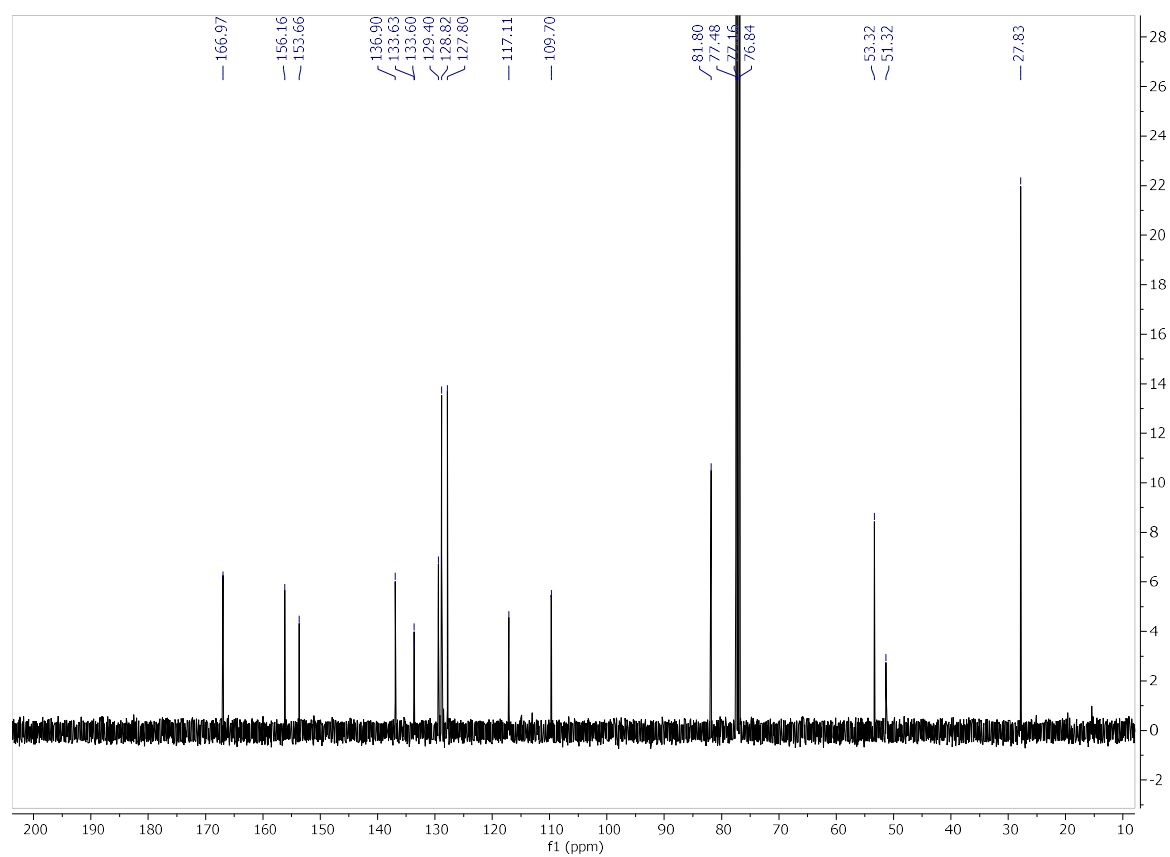

**1H-NMR** (400 MHz, CDCl<sub>3</sub>)

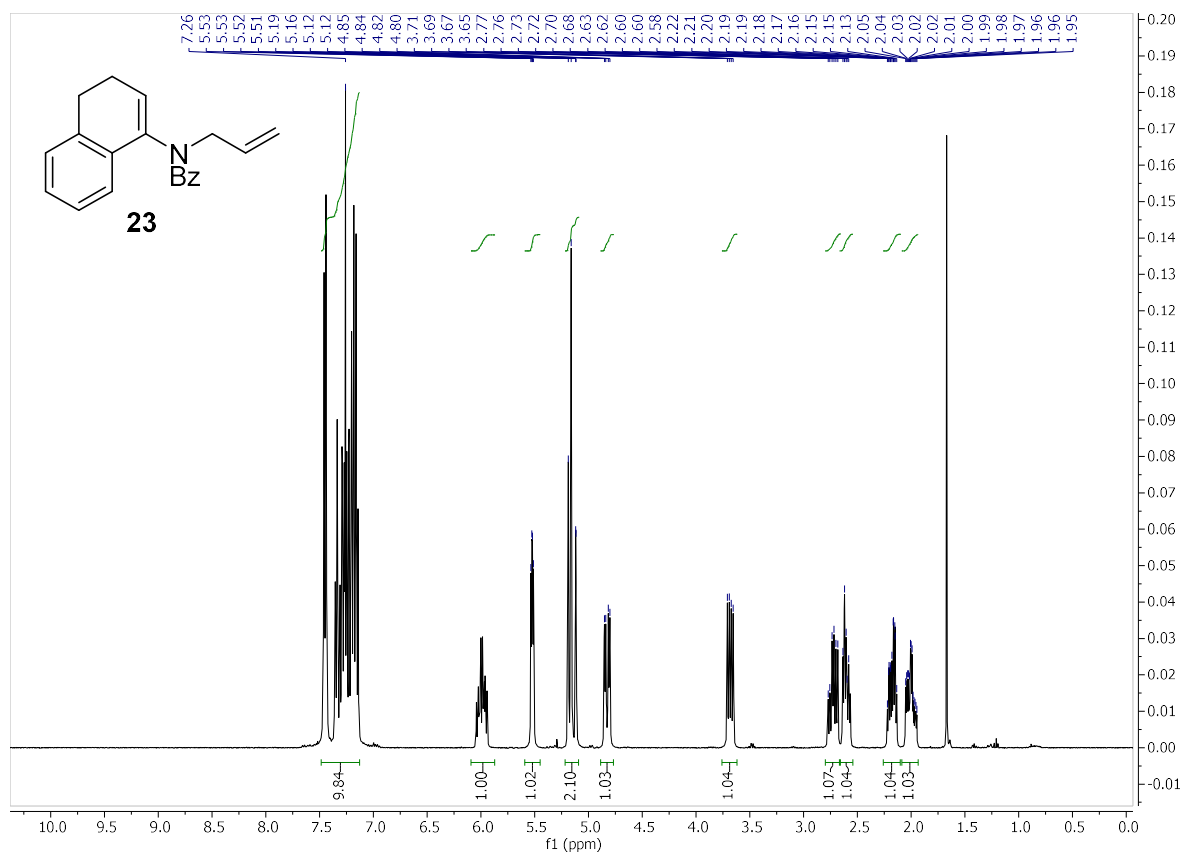

$^{13}\text{C-NMR}$  (101 MHz,  $\text{CDCl}_3$ )

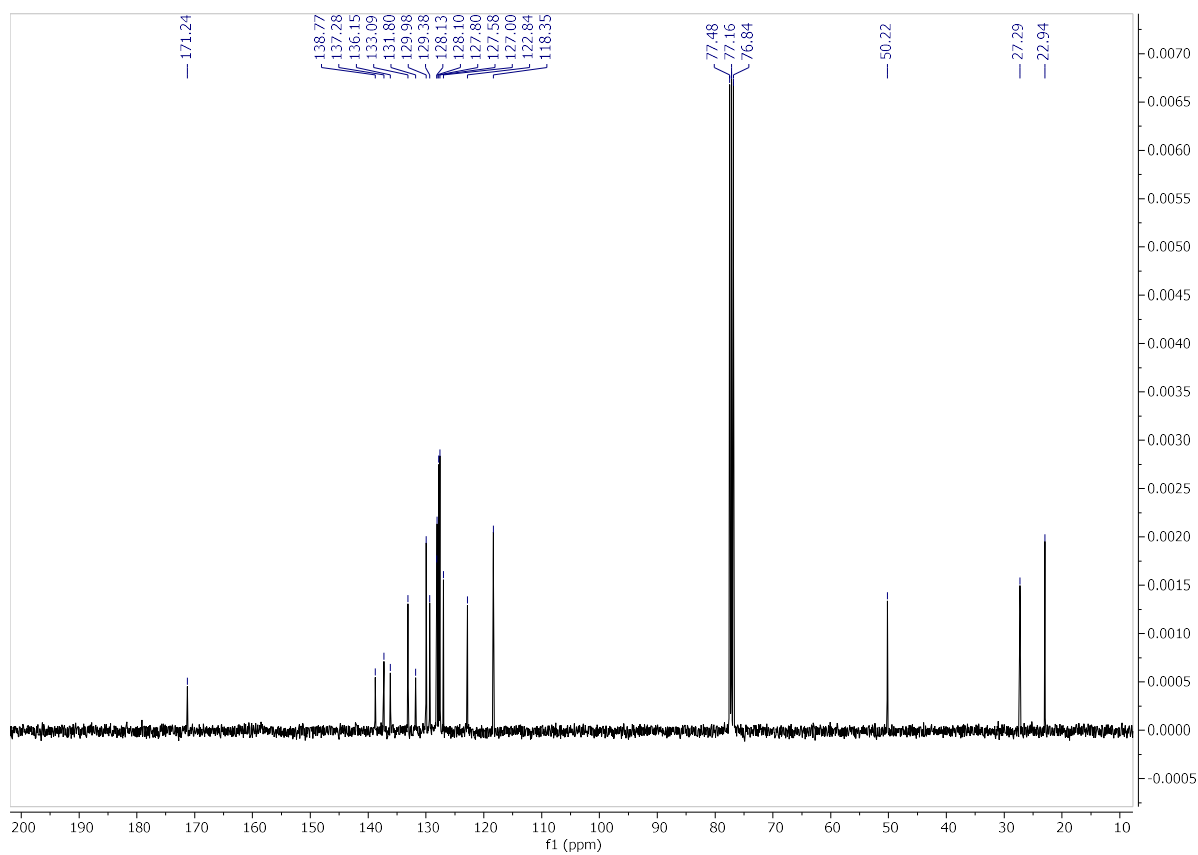

$^1\text{H-NMR}$  (400 MHz,  $\text{CDCl}_3$ )

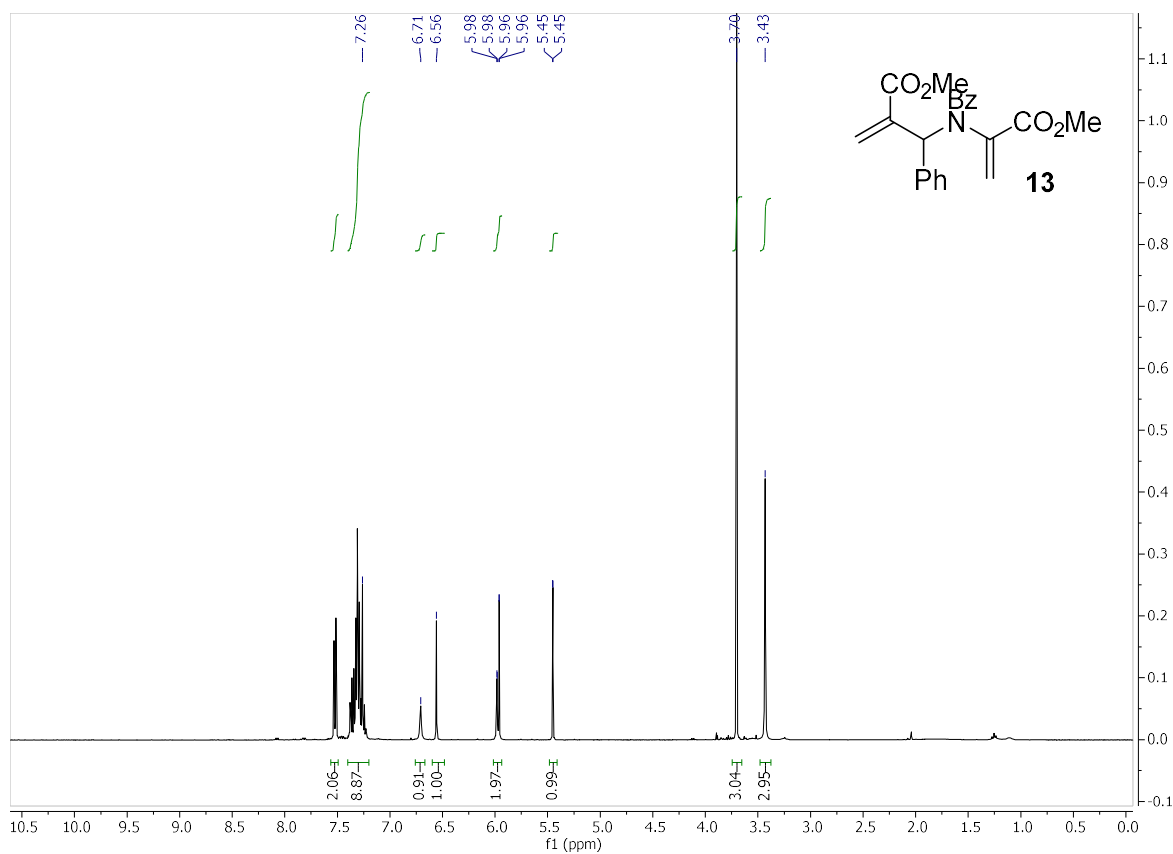

**13C-NMR (101 MHz, CDCl<sub>3</sub>)**

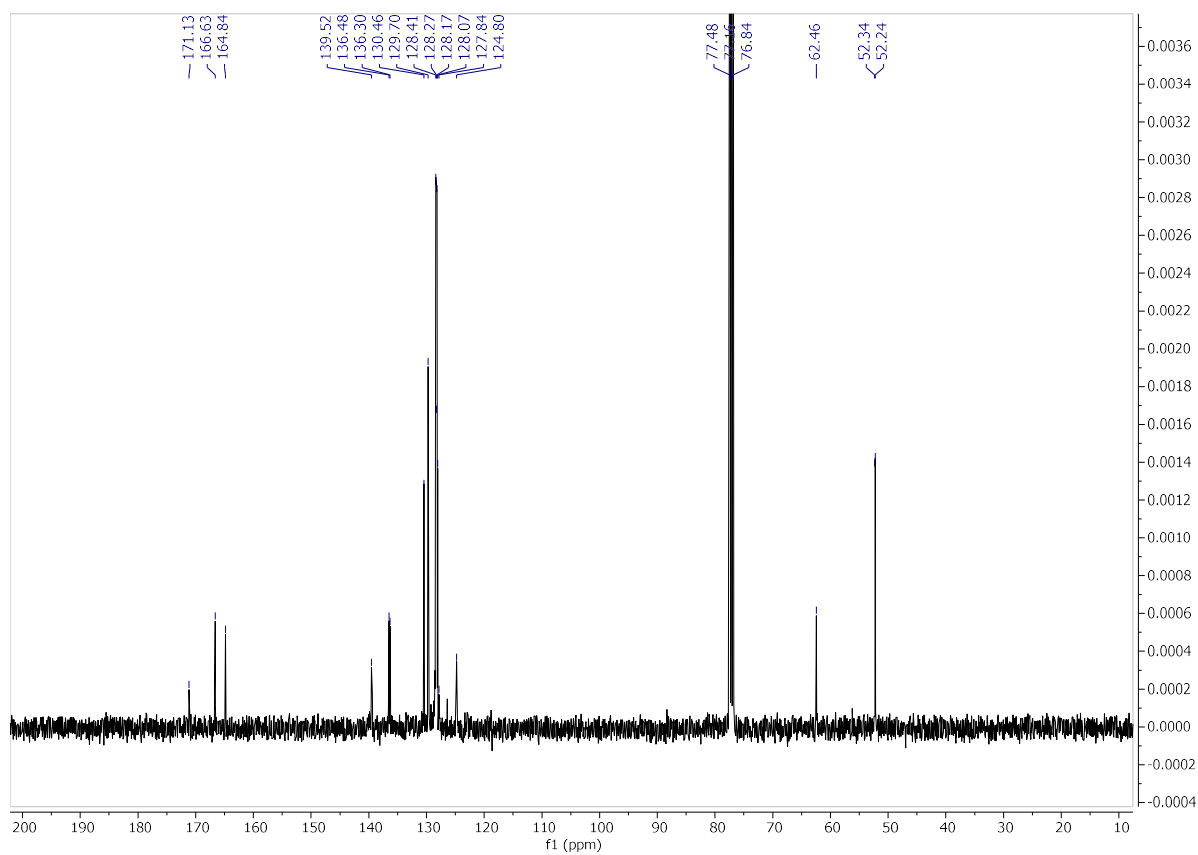

**1H-NMR (400 MHz, CDCl<sub>3</sub>)**



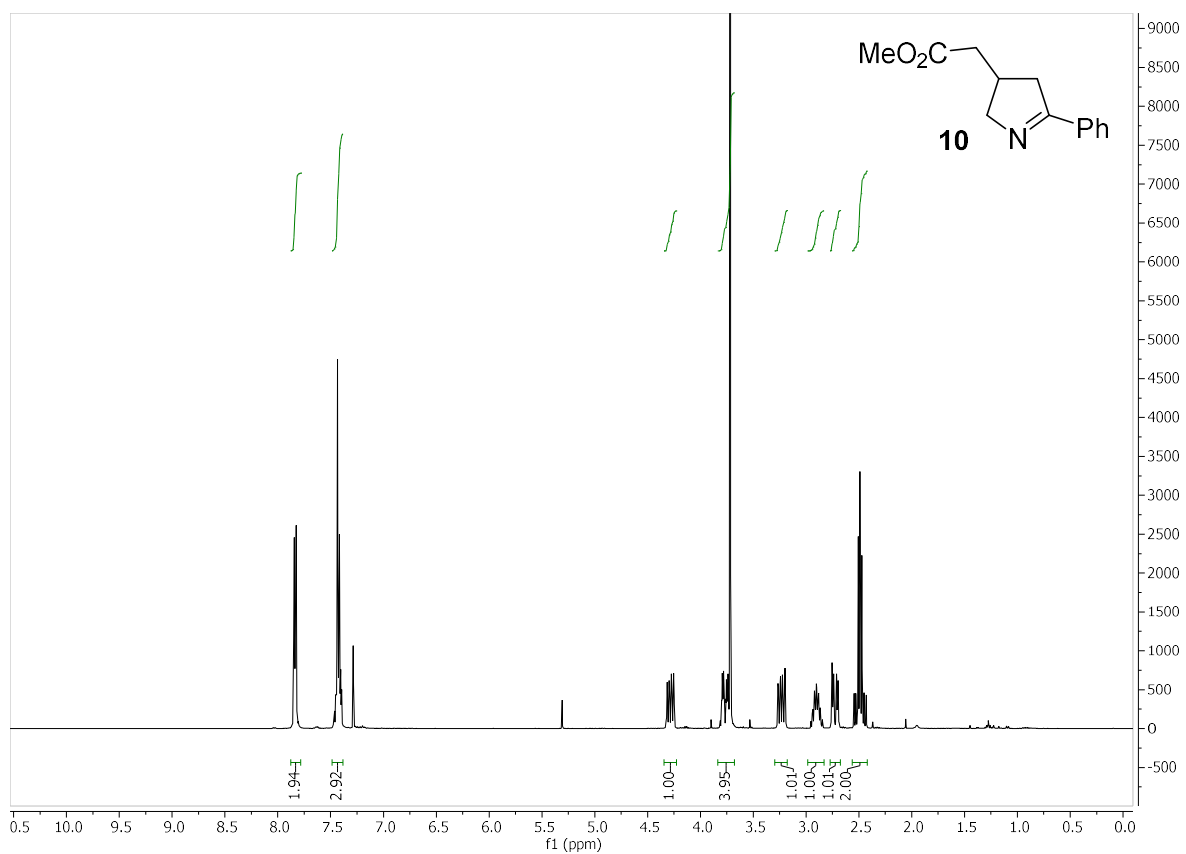

<sup>13</sup>C-NMR (101 MHz, CDCl<sub>3</sub>)

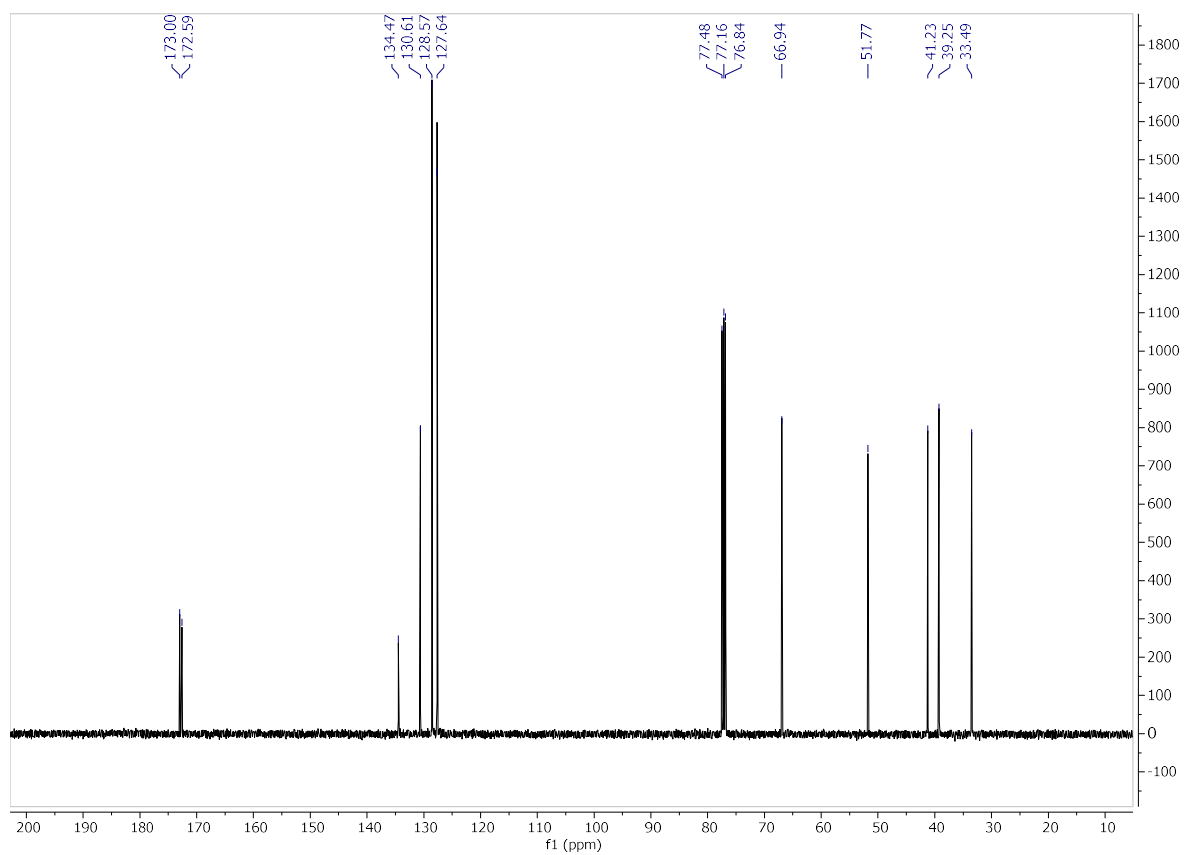

<sup>1</sup>H-NMR (400 MHz, CDCl<sub>3</sub>)

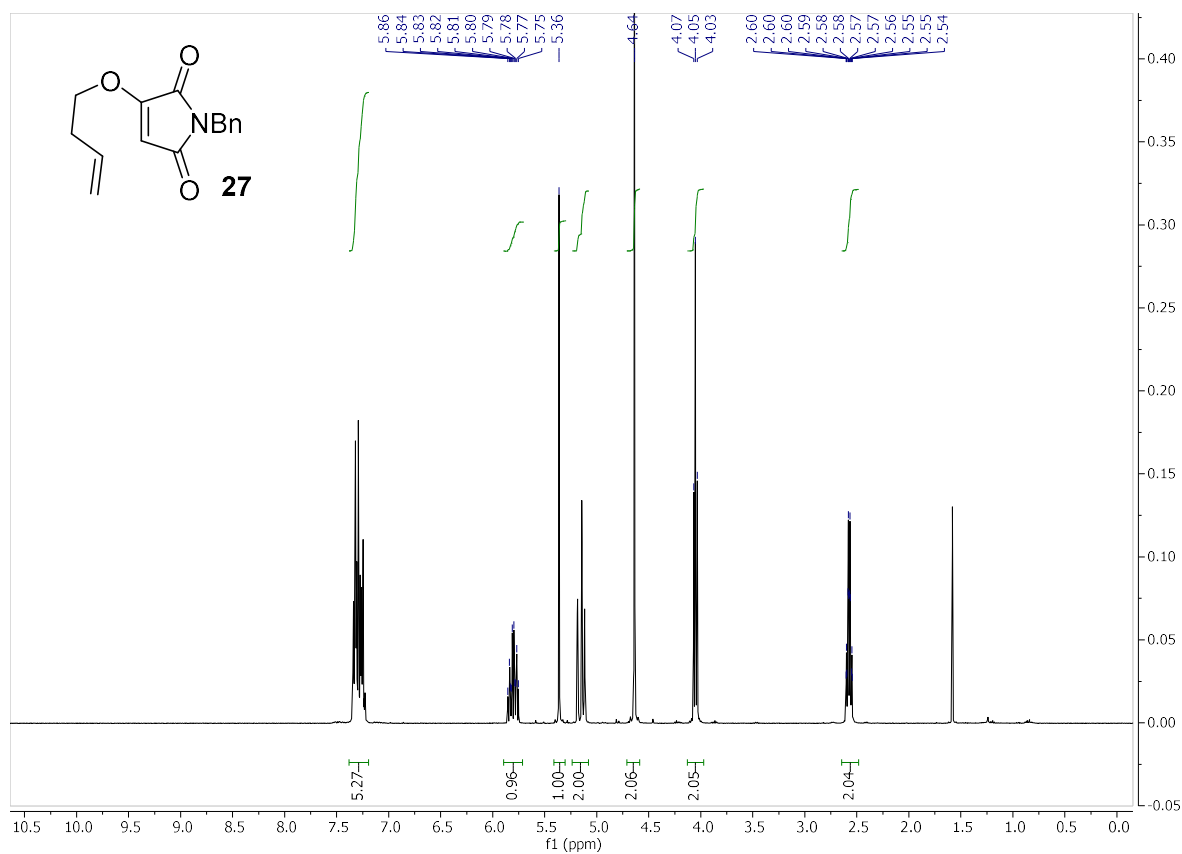

**<sup>13</sup>C-NMR (101 MHz, CDCl<sub>3</sub>)**

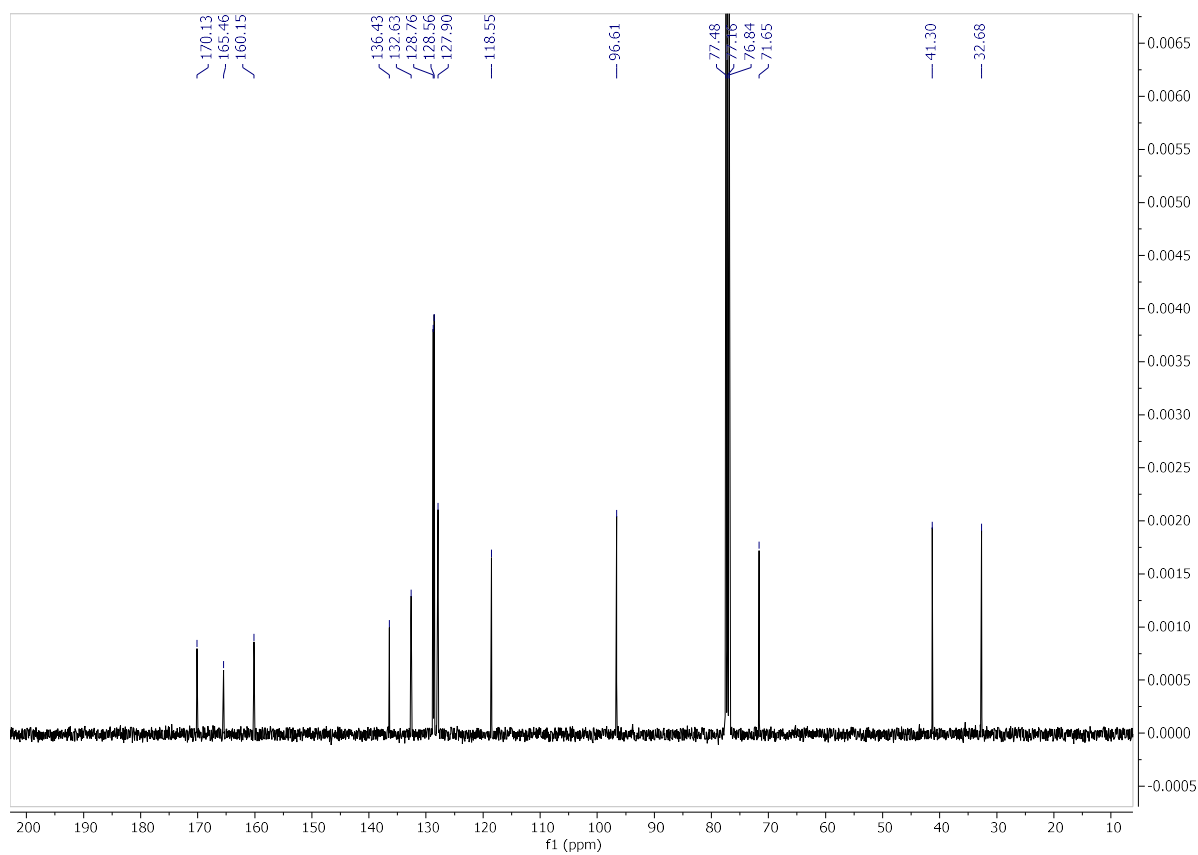

**<sup>1</sup>H-NMR (400 MHz, CDCl<sub>3</sub>)**

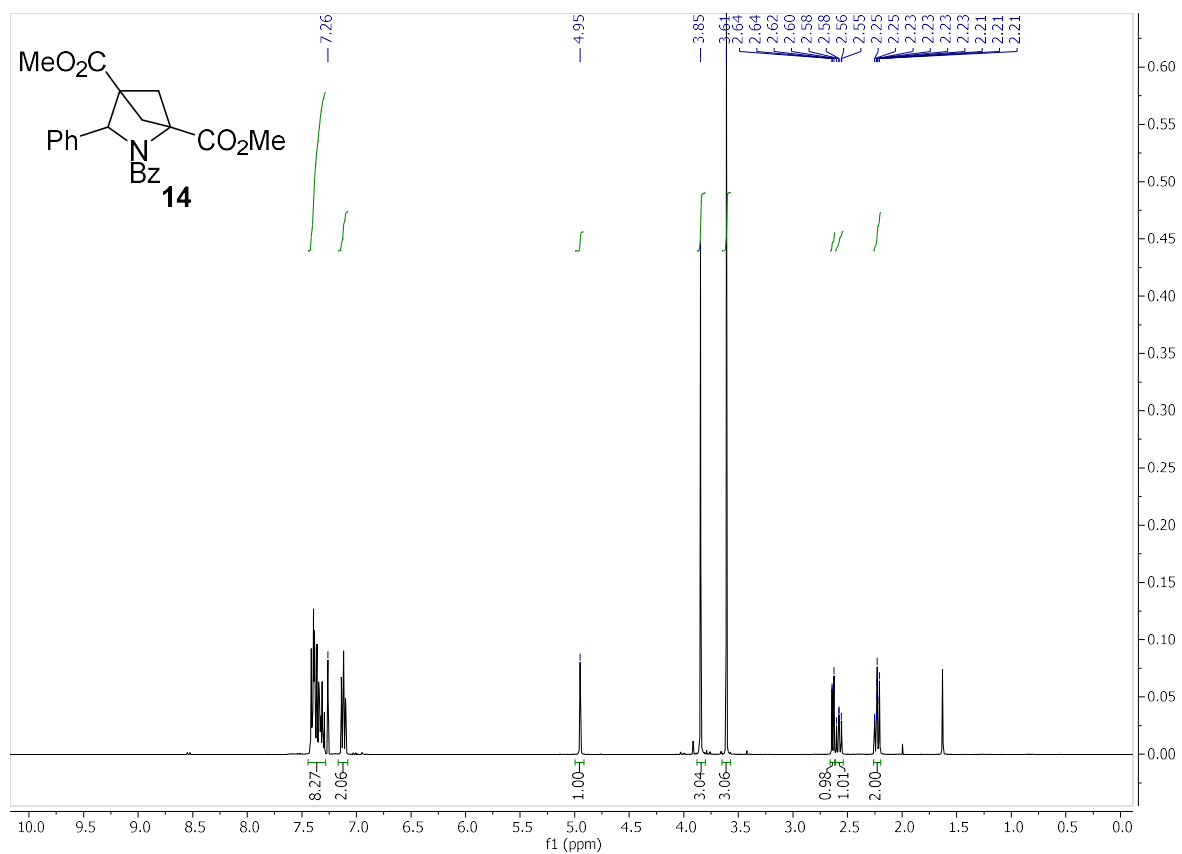

<sup>13</sup>C-NMR (101 MHz, CDCl<sub>3</sub>)

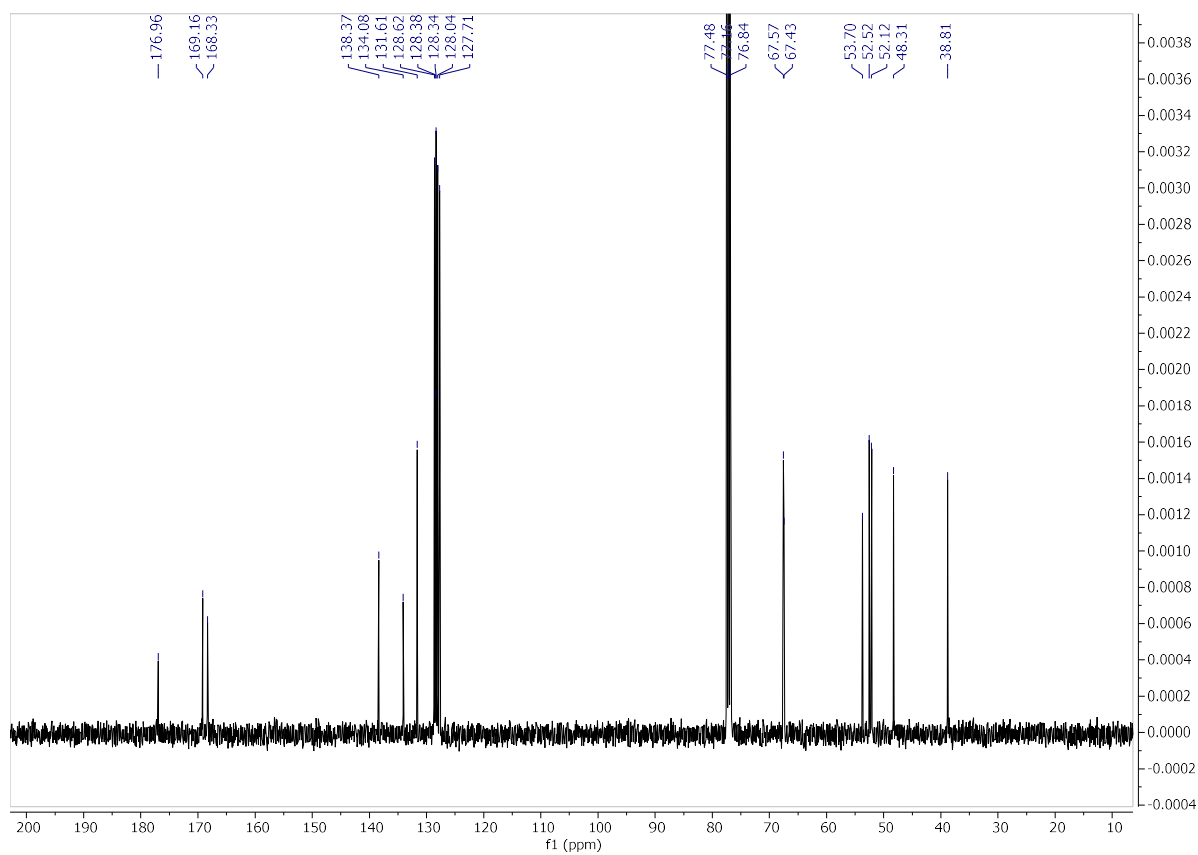

<sup>1</sup>H-NMR (500 MHz, DMSO-d<sub>6</sub>) 80°C

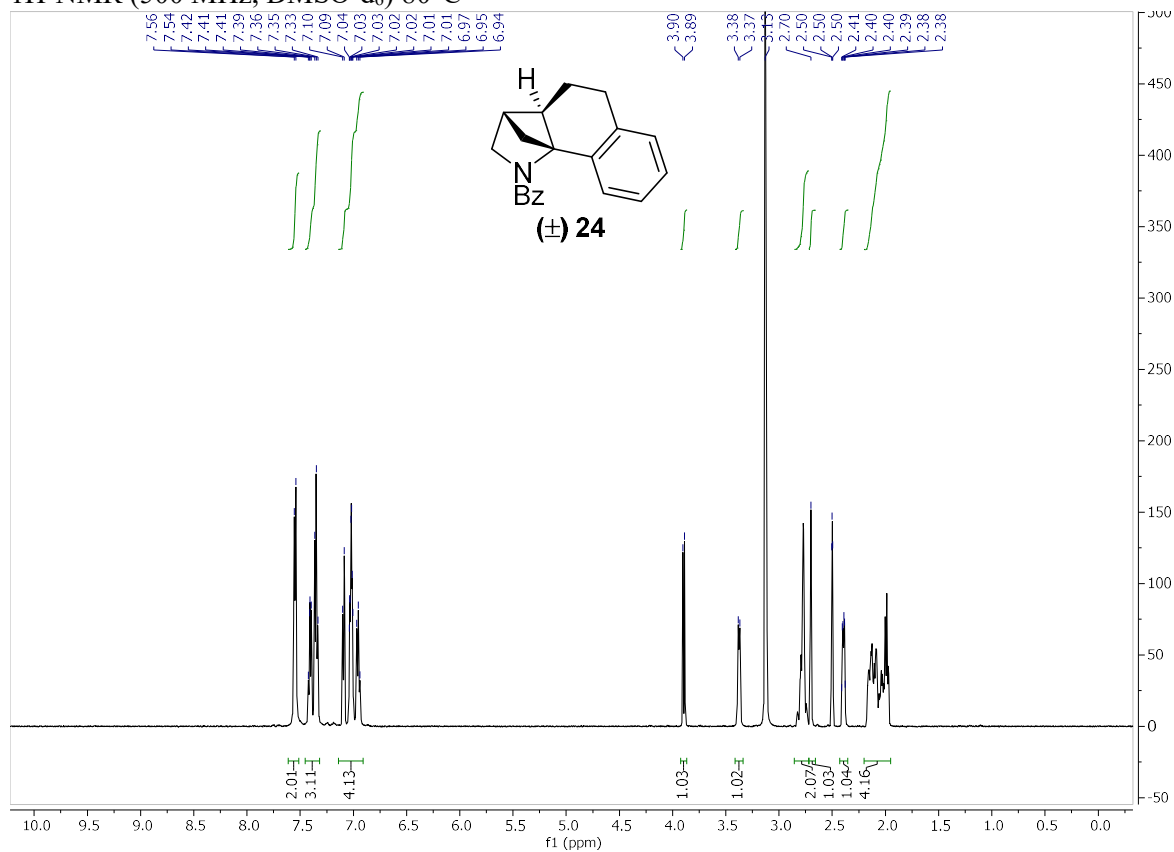

<sup>13</sup>C-NMR (126 MHz, DMSO-d<sub>6</sub>) 80°C

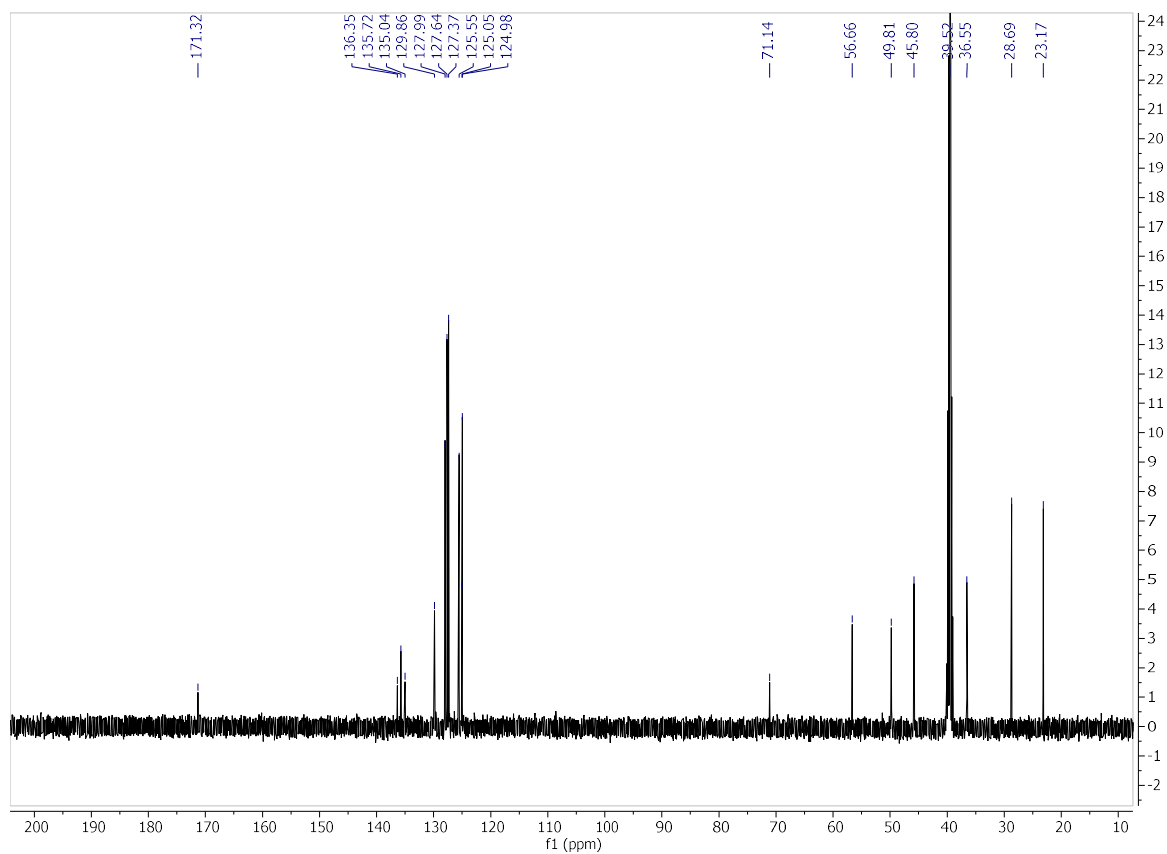

<sup>1</sup>H-NMR (400 MHz, CDCl<sub>3</sub>)

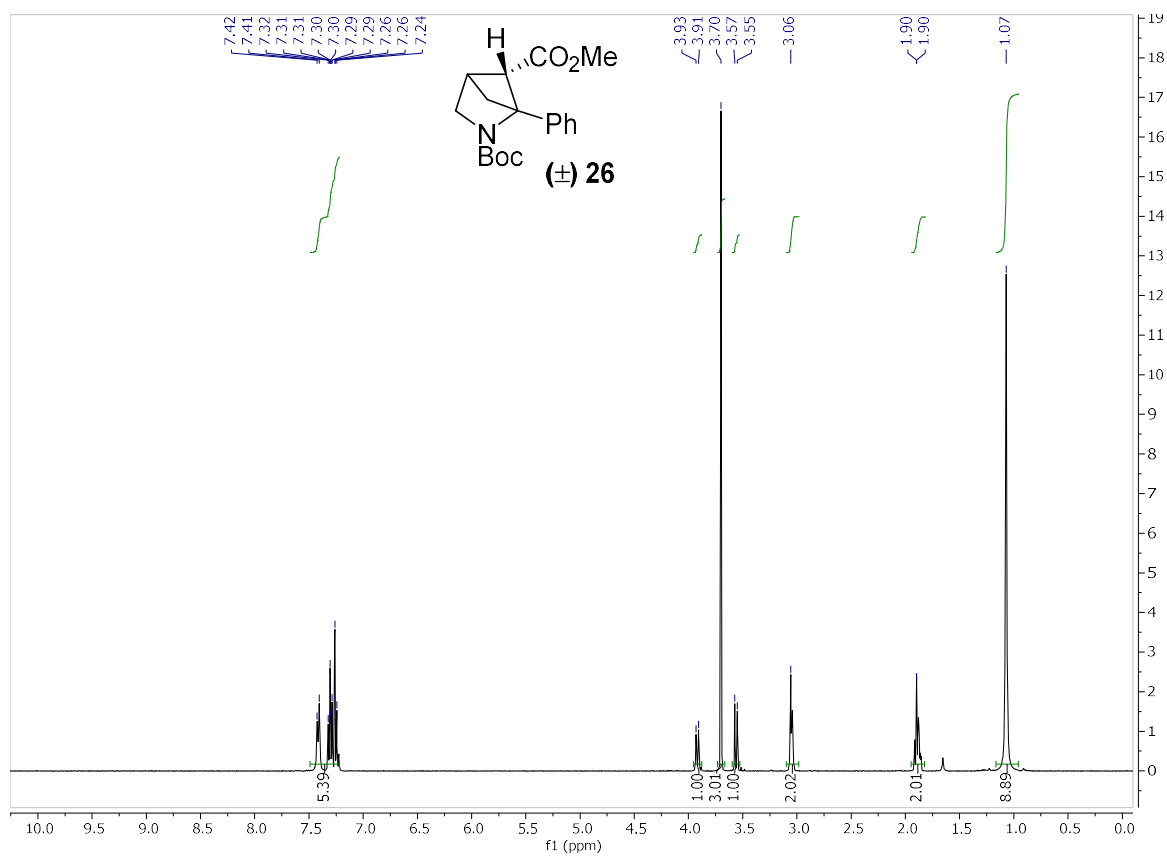

<sup>13</sup>C-NMR (101 MHz, CDCl<sub>3</sub>)

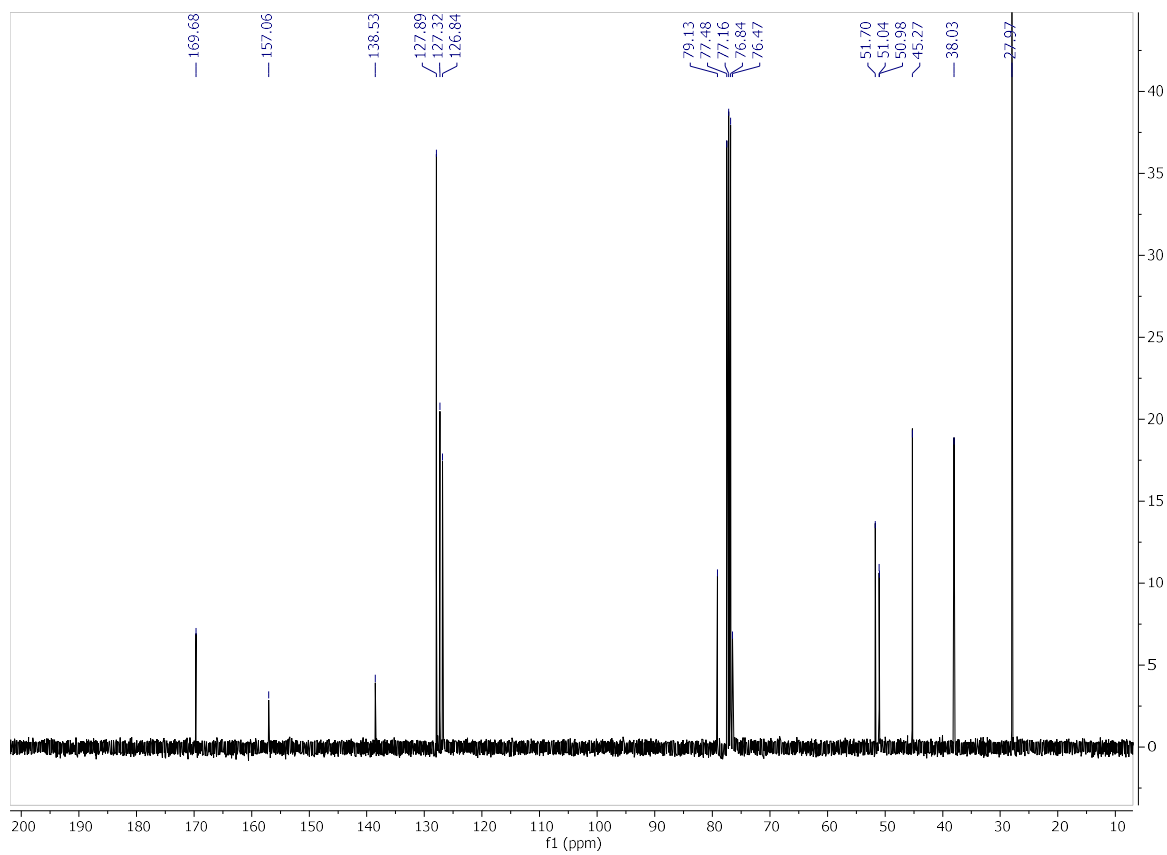

<sup>1</sup>H-NMR (400 MHz, CDCl<sub>3</sub>)

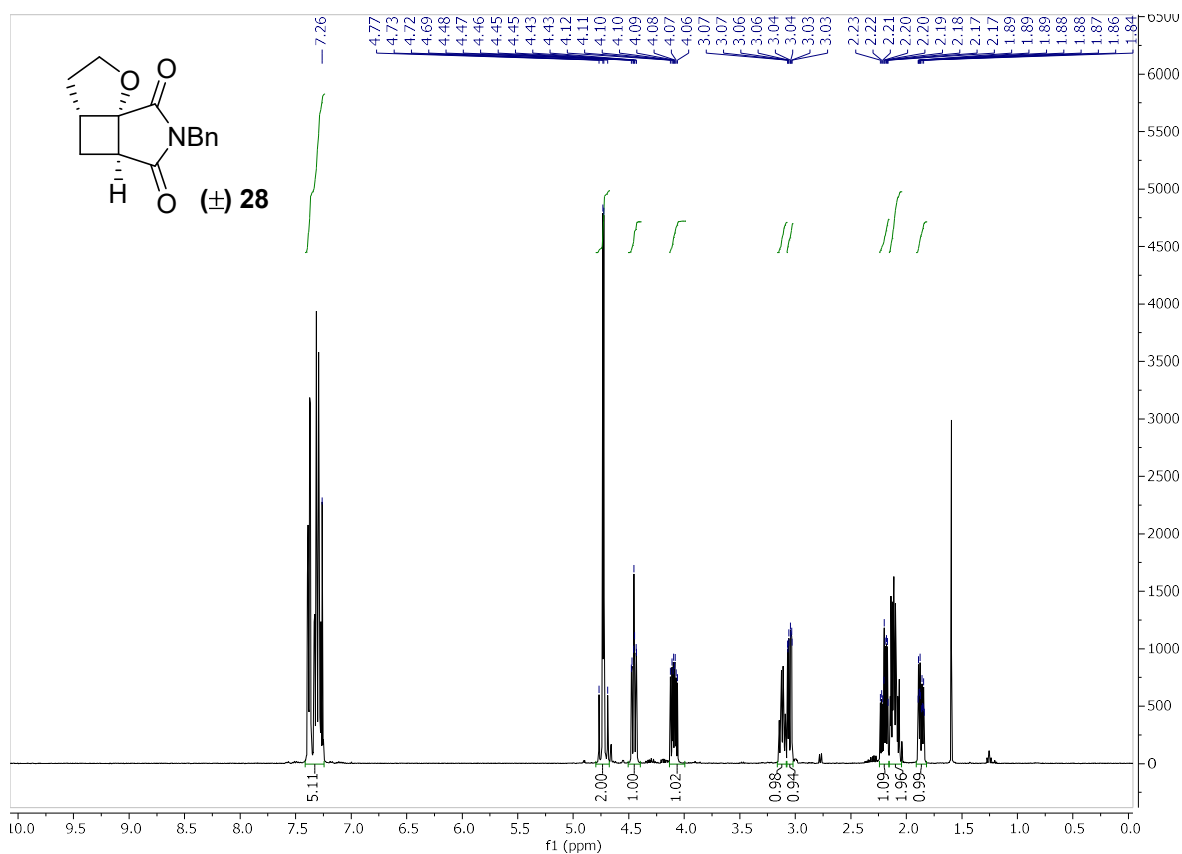

<sup>13</sup>C-NMR (101 MHz, CDCl<sub>3</sub>)

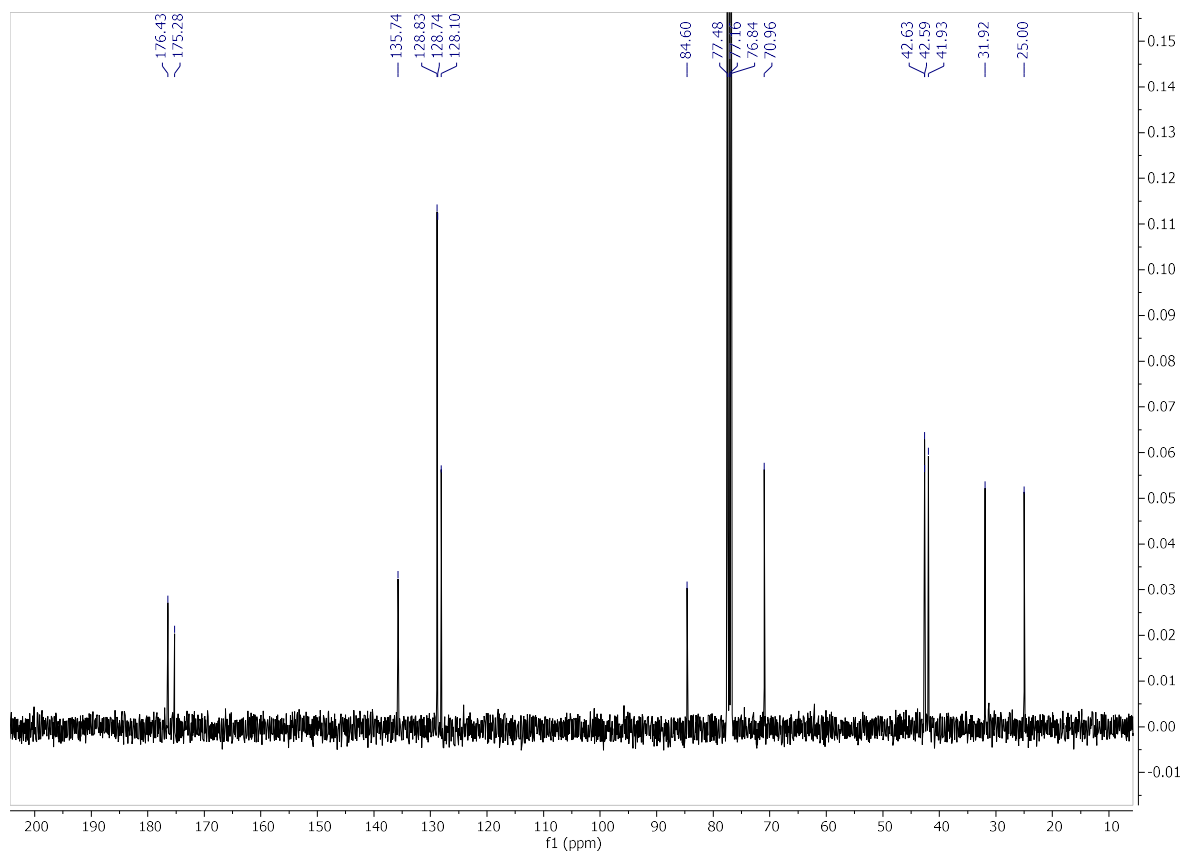

<sup>1</sup>H-NMR (500 MHz, DMSO-d<sub>6</sub>) 100°C

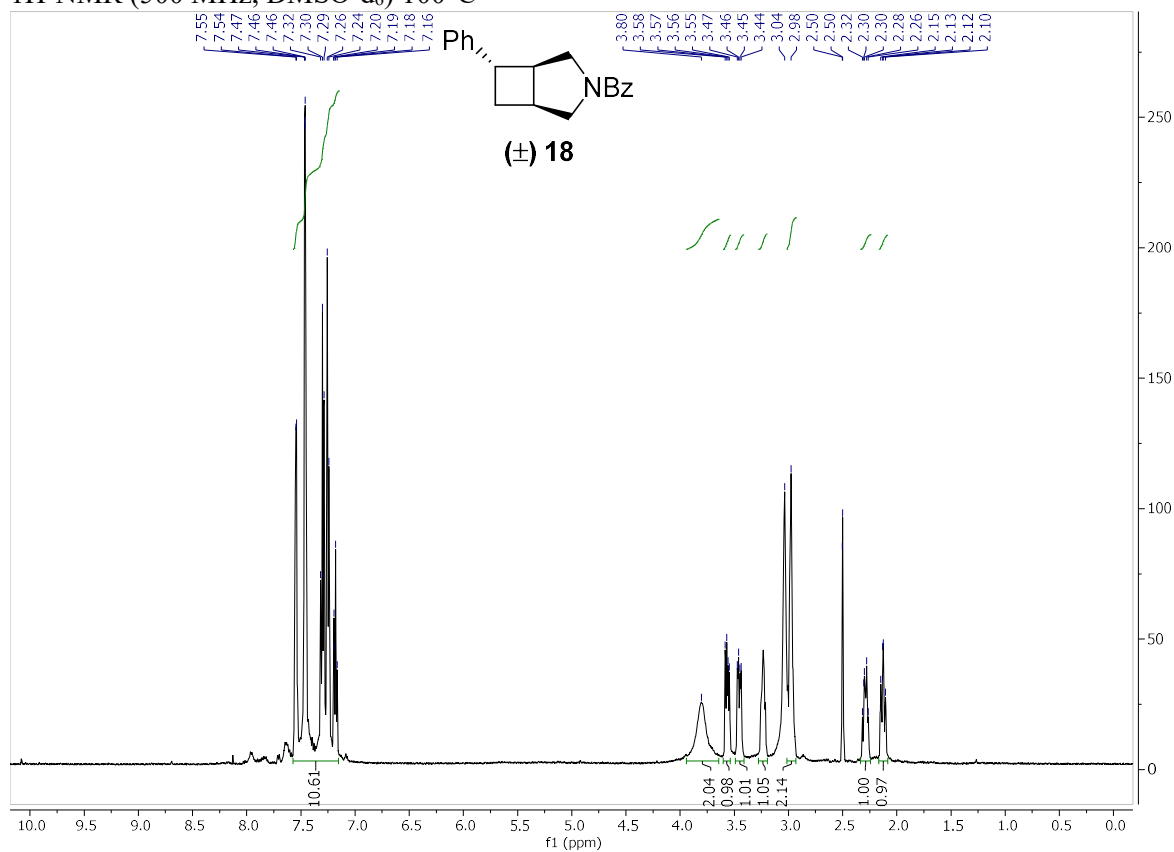

<sup>13</sup>C-NMR (126 MHz, DMSO-d<sub>6</sub>) 120°C

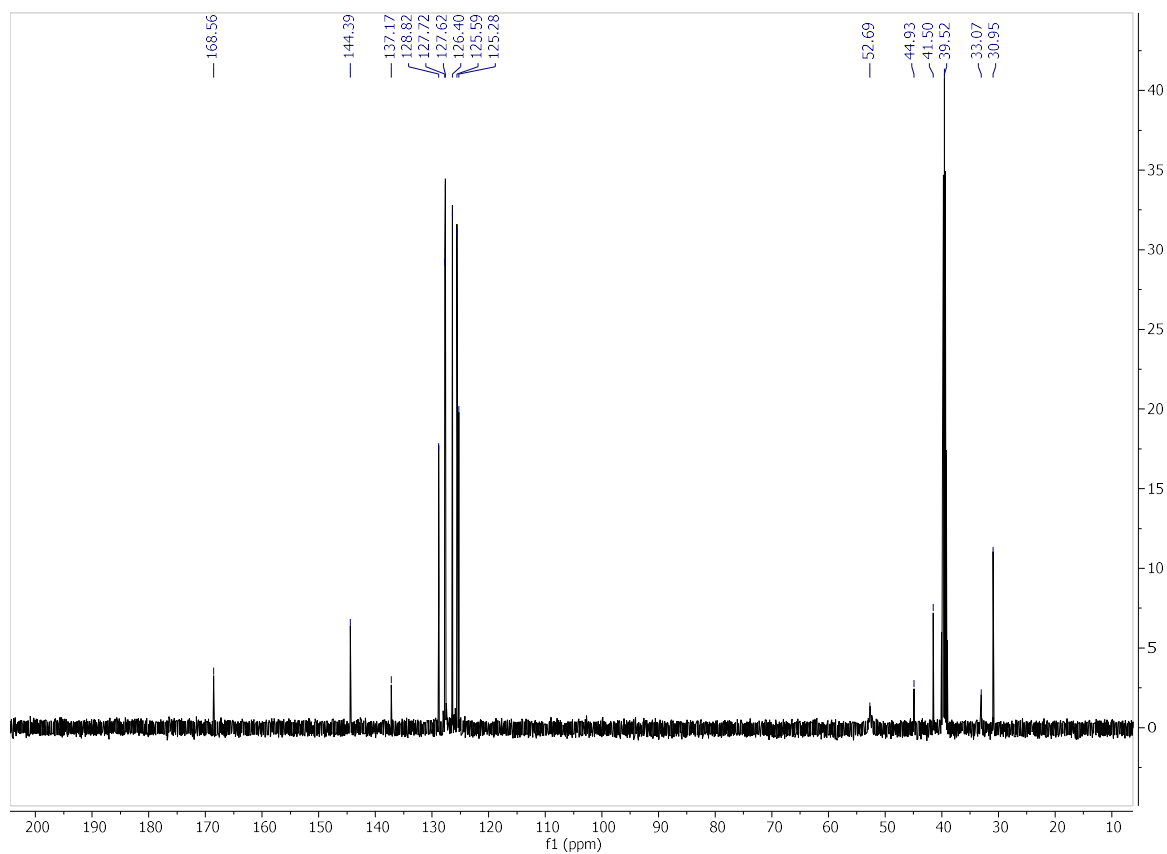

<sup>1</sup>H-NMR (400 MHz, DMSO-d<sub>6</sub>)

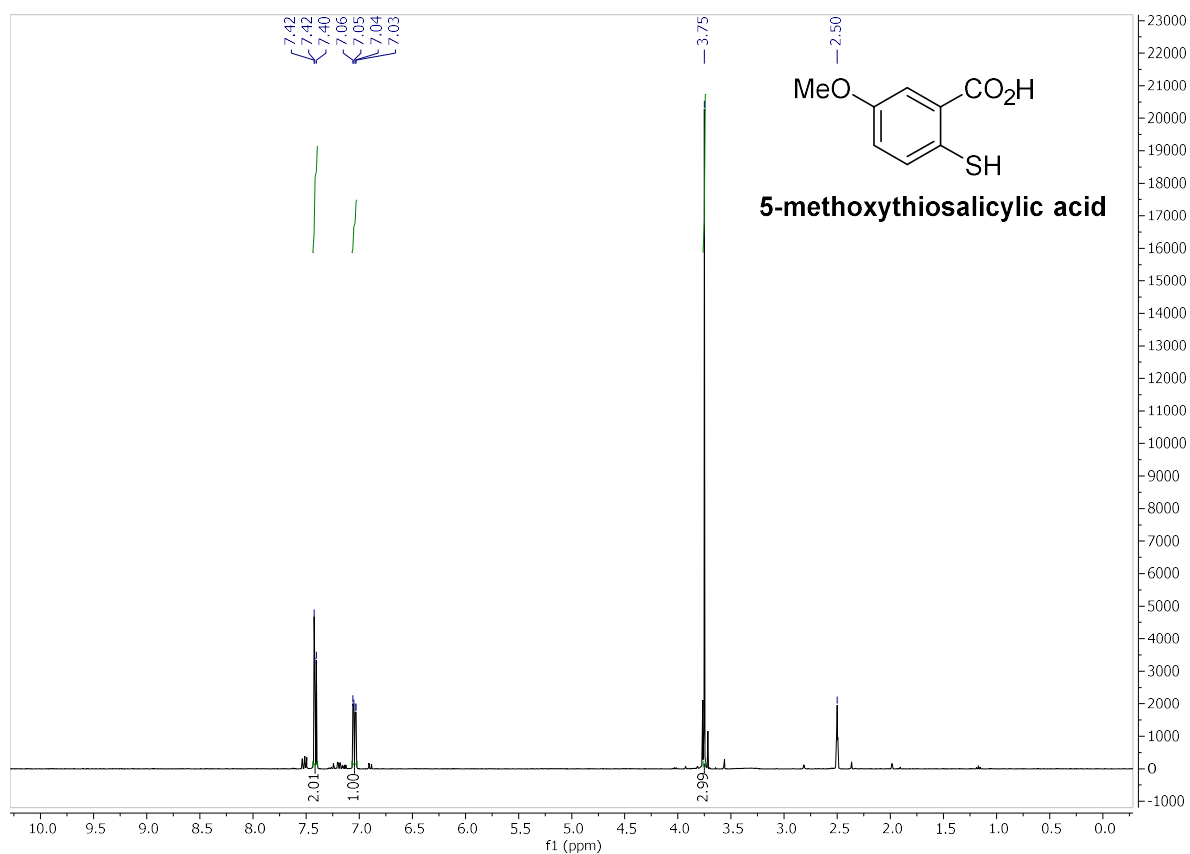

<sup>13</sup>C-NMR (101 MHz, DMSO-d<sub>6</sub>)

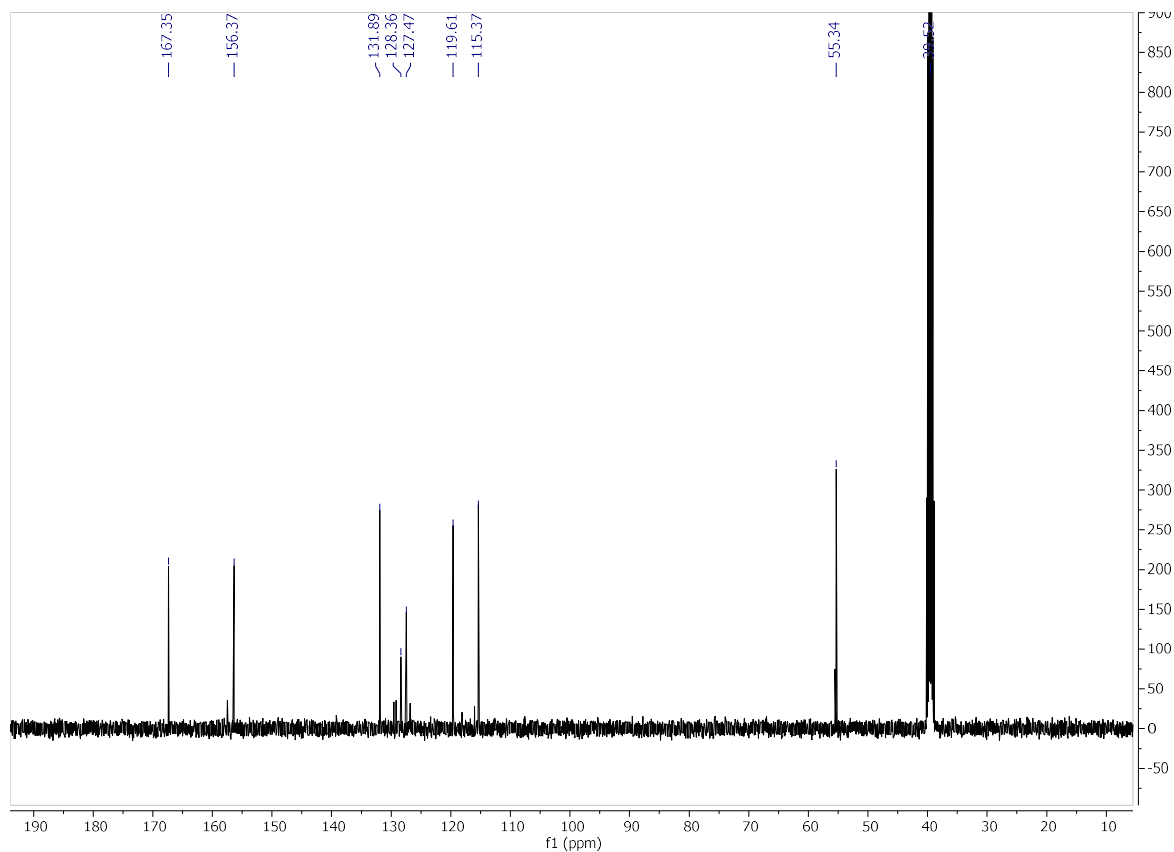



<sup>1</sup>H-NMR (400 MHz, DMSO-d<sub>6</sub>)

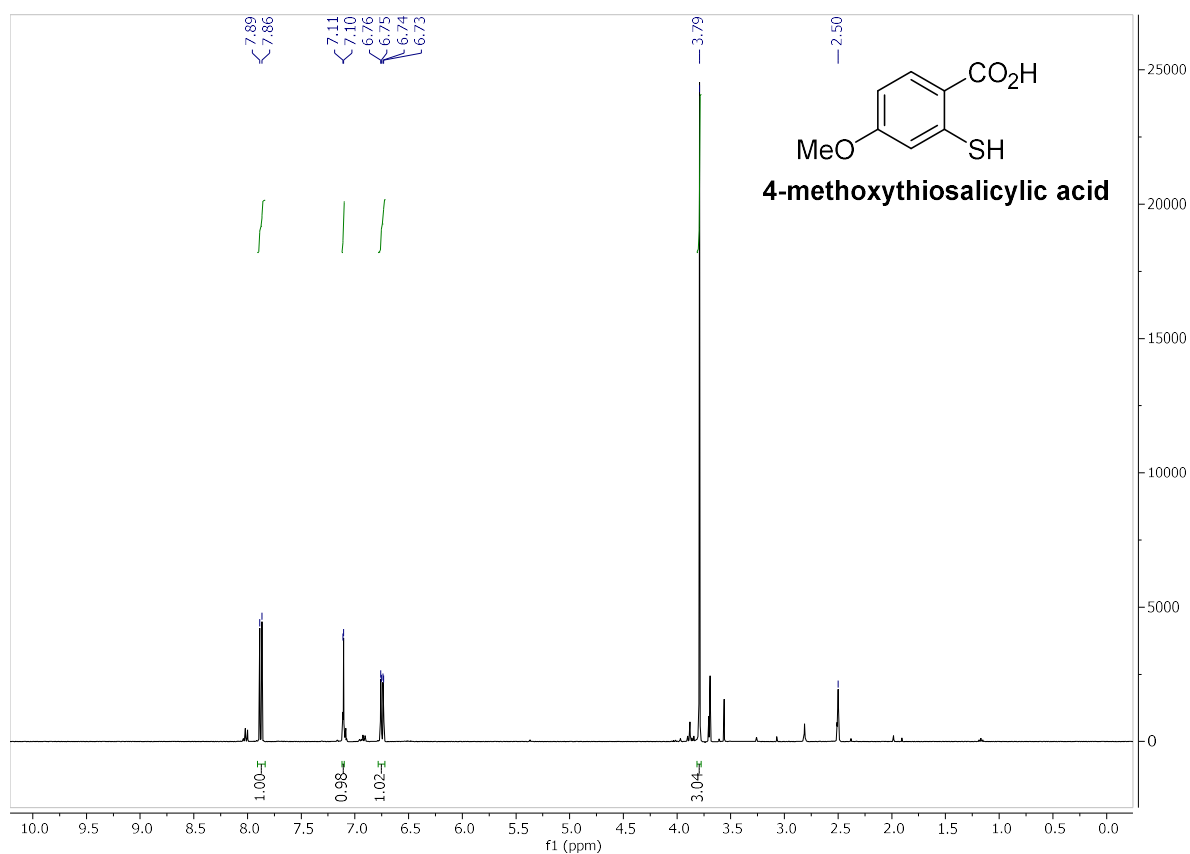

<sup>13</sup>C-NMR (101 MHz, DMSO-d<sub>6</sub>)

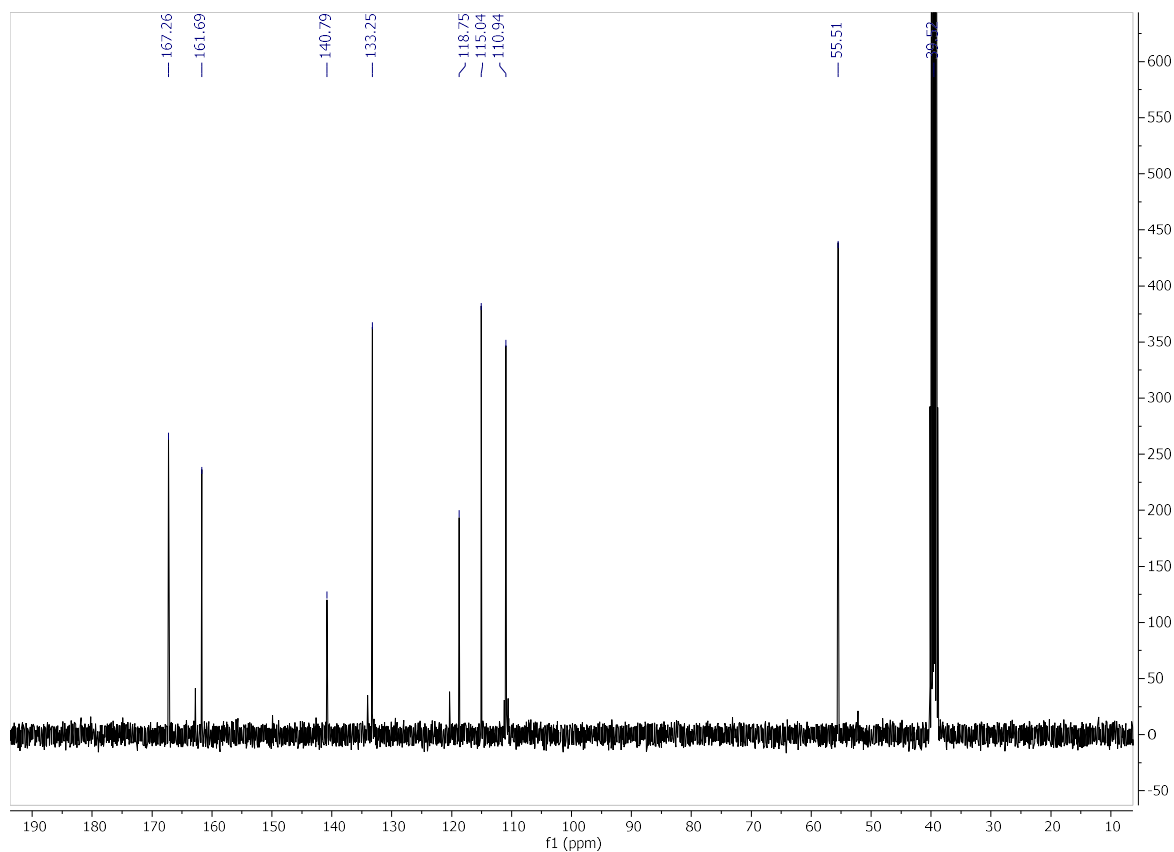

<sup>1</sup>H-NMR (500 MHz, DMSO-d<sub>6</sub>)

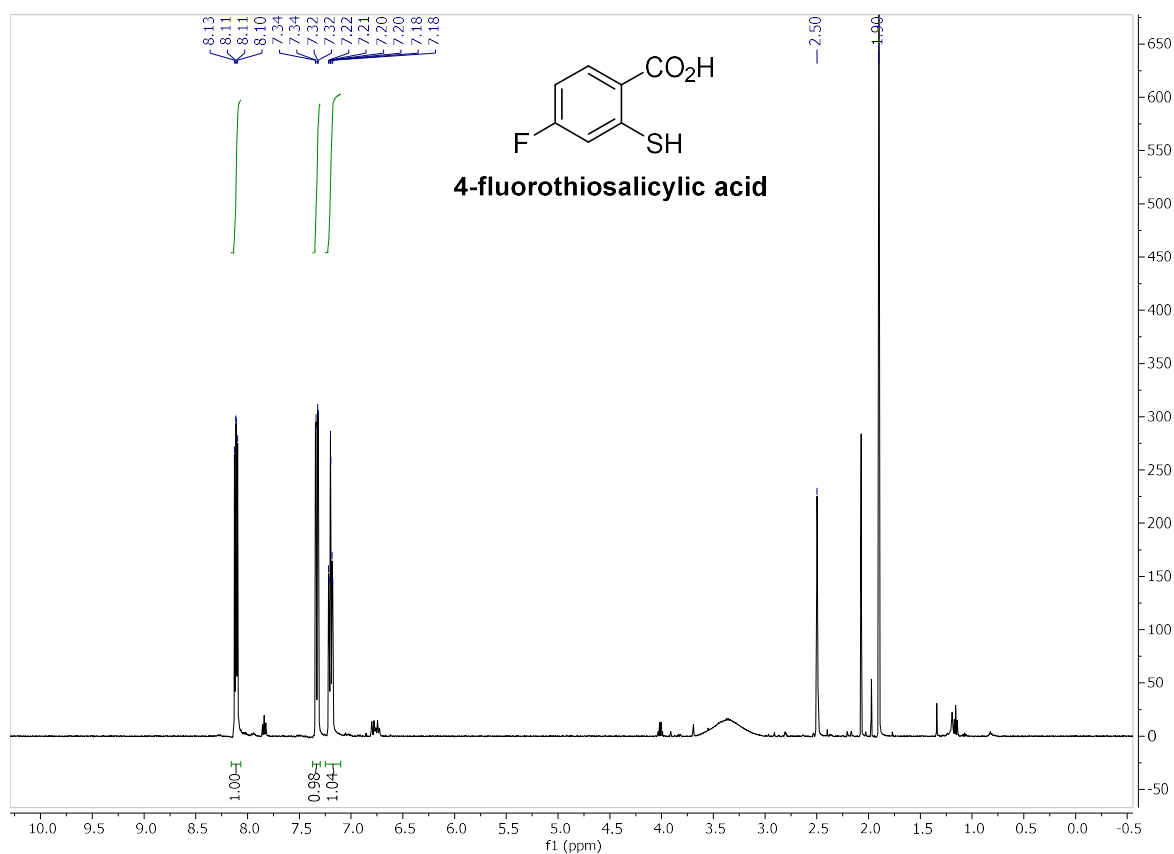

<sup>13</sup>C-NMR (126 MHz, DMSO-d<sub>6</sub>)

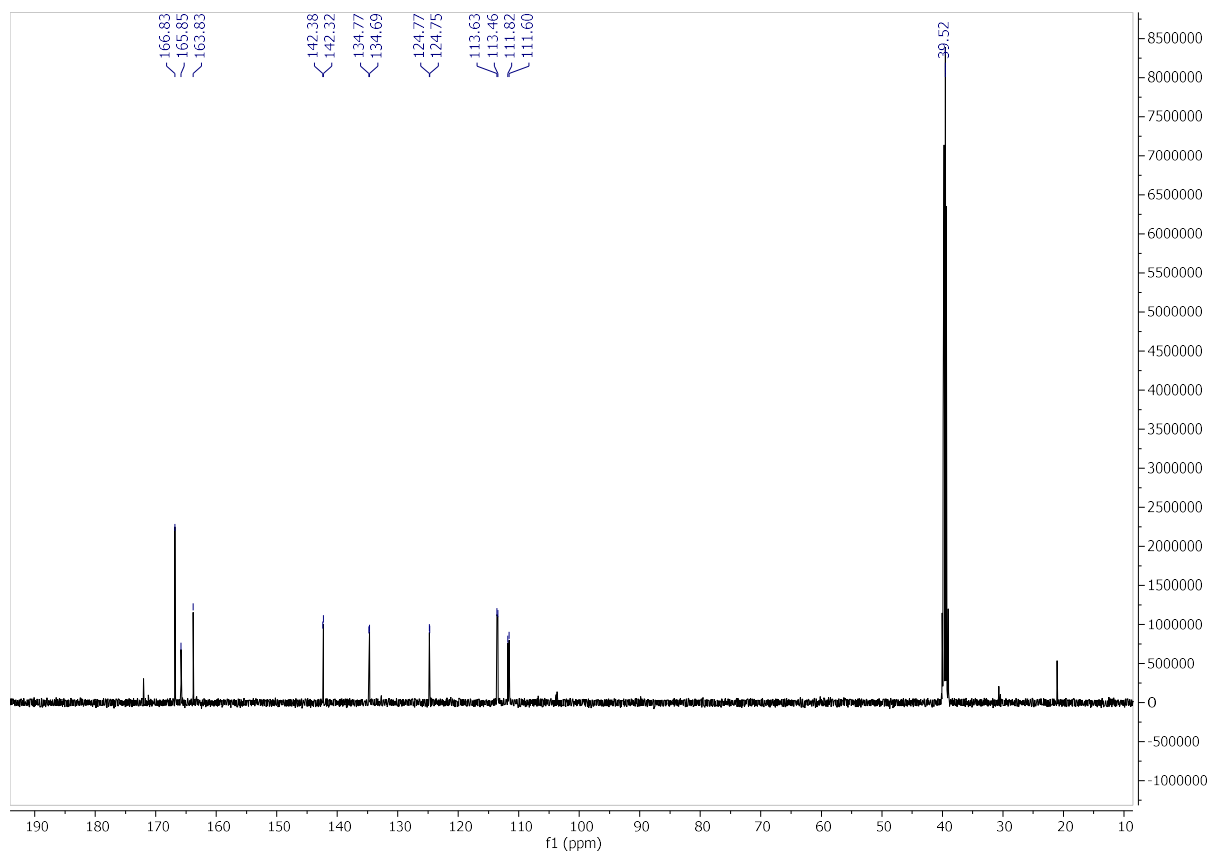

## References

- <sup>1</sup> Perkowski, A. J.; Cruz, C. L.; Nicewicz, D. A. An Ambient Temperature Newman-Kwart Rearrangement Mediated by Organic Photoredox Catalysis. *J. Am. Chem. Soc.* **2015**, *137*, 15684–15687
- <sup>2</sup> Herbicidal sulphonamides, Patent US4632693 (A), 1986
- <sup>3</sup> 1,3-BENZOTHAZINONE DERIVATIVES AND USE THEREOF, Patent EP1424336 (A1), 2004
- <sup>4</sup> 1,4-benzothiazepine derivatives, Patent US5416066 (A), 1995
- <sup>5</sup> Watanabe, M.; Date, M.; Tsukazaki, M.; Furukawa, S. *Chem. Pharm. Bull.* **1989**, *37*, 36–41
- <sup>6</sup> Roberts, K. C.; Smiles, S. CXIII. -Methoxy-derivatives of thioxanthone. *J. Chem. Soc.* **1929**, 863-872
- <sup>7</sup> Novel thioxanthene derivatives and salts thereof and a process for the manufacture of same. Patent GB861521 (A), 1961
- <sup>8</sup> Brennan, Peter, Michael W. George, Omar S. Jina, Conor Long, Jennifer McKenna, Mary T. Pryce, Xue-Zhong Sun, and Khuong Q. Vuong. Photoinduced Se–C Insertion Following Photolysis of ( $\eta^5$ -C<sub>4</sub>H<sub>4</sub>Se)Cr(CO)<sub>3</sub>. A Picosecond and Nanosecond Time-Resolved Infrared, Matrix Isolation, and DFT Investigation. *Organometallics*, **2008**, *27*, 3671-3680
- <sup>9</sup> Gaussian 16, Revision C.01, Frisch, M. J.; Trucks, G. W.; Schlegel, H. B.; Scuseria, G. E.; Robb, M. A.; Cheeseman, J. R.; Scalmani, G.; Barone, V.; Petersson, G. A.; Nakatsuji, H.; Li, X.; Caricato, M.; Marenich, A. V.; Bloino, J.; Janesko, B. G.; Gomperts, R.; Mennucci, B.; Hratchian, H. P.; Ortiz, J. V.; Izmaylov, A. F.; Sonnenberg, J. L.; Williams-Young, D.; Ding, F.; Lipparini, F.; Egidi, F.; Goings, J.; Peng, B.; Petrone, A.; Henderson, T.; Ranasinghe, D.; Zakrzewski, V. G.; Gao, J.; Rega, N.; Zheng, G.; Liang, W.; Hada, M.; Ehara, M.; Toyota, K.; Fukuda, R.; Hasegawa, J.; Ishida, M.; Nakajima, T.; Honda, Y.; Kitao, O.; Nakai, H.; Vreven, T.; Throssell, K.; Montgomery, J. A., Jr.; Peralta, J. E.; Ogliaro, F.; Bearpark, M. J.; Heyd, J. J.; Brothers, E. N.; Kudin, K. N.; Staroverov, V. N.; Keith, T. A.; Kobayashi, R.; Normand, J.; Raghavachari, K.; Rendell, A. P.; Burant, J. C.; Iyengar, S. S.; Tomasi, J.; Cossi, M.; Millam, J. M.; Klene, M.; Adamo, C.; Cammi, R.; Ochterski, J. W.; Martin, R. L.; Morokuma, K.; Farkas, O.; Foresman, J. B.; Fox, D. J. Gaussian, Inc., Wallingford CT, 2016.
- <sup>10</sup> Elliott, L. D.; Berry, M.; Harji, B.; Klauber, D.; Leonard, J.; Booker-Milburn, K. I. *Org. Process Res. Dev.* **2016**, *20*, 1806-1811
- <sup>11</sup> Elliott, L. D.; Booker-Milburn, K. I. Photochemically Produced Aminocyclobutanes as Masked Dienes in Thermal Electrocyclic Cascade Reactions. *Org. Lett.* **2019**, *21*, 1463–1466
- <sup>12</sup> Bruker, SAINT+ v8.38A Integration Engine, Data Reduction Software, Bruker Analytical X-ray Instruments Inc., Madison, WI, USA **2015**.
- <sup>13</sup> Bruker, SADABS 2014/5, Bruker AXS area detector scaling and absorption correction, Bruker Analytical X-ray Instruments Inc., Madison, Wisconsin, USA **2014/5**.
- <sup>14</sup> Sheldrick, G. M., SHELXT - Integrated space-group and crystal-structure determination. *Acta Crystallographica a-Foundation and Advances* **2015**, *71*, 3-8.
- <sup>15</sup> Sheldrick, G. M., A short history of SHELX. *Acta Crystallographica Section A* **2008**, *64*, 112-122.
- <sup>16</sup> Sheldrick, G. M., Crystal structure refinement with SHELXL. *Acta Crystallographica Section C-Structural Chemistry* **2015**, *71*, 3-8.
- <sup>17</sup> Dolomanov, O. V.; Bourhis, L. J.; Gildea, R. J.; Howard, J. A. K.; Puschmann, H., OLEX2: a complete structure solution, refinement and analysis program. *Journal of Applied Crystallography* **2009**, *42*, 339-341.
